# Supplementary material for: Electrophilic bromination of substituted stilbenes and stilbazoles: a quantum-chemical investigation
Source: Royal Society of Chemistry journal article supplement (doi:10.1039/c3cp54612h), 2013-12-02
Supplement: c3cp54612h.pdf [file c3cp54612h.pdf]

## Quantum chemical investigation into the electrophilic bromination of substituted stilbenes and stilbazoles

Supporting Information

**Table S1:** Cartesian coordinates for the optimised geometries of stilbenes and stilbazoles calculated at the MP2/6-31G(d,p) level of theory.

### Stilbene 1

C,0.0191068147,-0.6757871238,0.1264603123  
C,-0.0191177354,0.6757899412,0.1264603123  
C,-2.1763349241,-3.6857814405,0.6768357463  
C,-1.0743183965,-2.8432068989,0.6531629196  
C,-1.1553322527,-1.5474259521,0.1085655696  
C,-2.3809694746,-1.1463107913,-0.4427604285  
C,-3.5013226269,-1.9783253694,-0.4179754131  
C,-3.3996264525,-3.2560890133,0.1447330726  
C,1.155321332,1.5474287695,0.1085655696  
C,1.0743074758,2.8432097163,0.6531629196  
C,2.1763240034,3.6857842579,0.6768357463  
C,3.3996155318,3.2560918307,0.1447330726  
C,3.5013117062,1.9783281868,-0.4179754131  
C,2.3809585539,1.1463136087,-0.4427604285  
O,4.4231539492,4.1646952989,0.2176112074  
C,5.6776119194,3.7536853967,-0.3124721248  
O,-4.4231648699,-4.1646924815,0.2176112074  
C,-5.6776228401,-3.7536825793,-0.3124721248  
H,-0.9849959851,1.1707891966,0.1808354572  
H,0.9849850643,-1.1707863792,0.1808354572  
H,0.1349442065,3.183737816,1.0740804607  
H,2.4593438614,0.1758210097,-0.9178196129  
H,4.4248831794,1.6322872573,-0.8589917198  
H,2.1198752589,4.680314213,1.0995500374  
H,-0.1349551272,-3.1837349986,1.0740804607  
H,-2.4593547821,-0.1758181923,-0.9178196129  
H,-4.4248941001,-1.6322844399,-0.8589917198  
H,-2.1198861796,-4.6803113956,1.0995500374  
H,6.3499223526,4.5908449612,-0.1531358874  
H,6.0597726423,2.8732098624,0.2076404071  
H,5.6077203563,3.5393990161,-1.380684574  
H,-6.3499332733,-4.5908421438,-0.1531358874  
H,-6.059783563,-2.8732070449,0.2076404071  
H,-5.607731277,-3.5393961987,-1.380684574

### Stilbene 3

C,-0.5956491099,-0.5172975489,0.0324585983  
C,0.5374470806,-1.2540080609,0.0552671075  
C,0.5863816914,-2.7165787437,0.0052948544  
C,-0.6459926204,0.9444710787,0.0549610021  
C,-1.7797981156,1.5976941064,0.5742892349  
C,0.4005051689,1.7400810136,-0.4334762017

### Stilbene 2

C,-0.3195961385,-1.5097167547,0.5977391331  
C,0.5614299761,-1.6171293901,-0.4221287145  
C,2.008155759,-1.7719976906,-0.2671864481  
C,-1.7685601618,-1.3822303984,0.4439173718  
C,-2.525057597,-0.74220462,1.4440060662  
C,-2.4531753362,-1.8846823631,-0.6722350107  
C,-3.8316754808,-1.7226501478,-0.8182332019  
C,-3.8972510433,-0.5809871065,1.3177451685  
C,-4.5592708406,-1.0670971345,0.1821025799  
C,2.8670478743,-1.3518292949,-1.2962931411  
C,2.5854866528,-2.3443968663,0.8796577439  
C,3.9682334469,-2.4450248144,1.0055737202  
C,4.8249610695,-2.0114300712,-0.0153054282  
C,4.2493528035,-1.462897641,-1.1679994756  
H,0.0603540621,-1.4760287076,1.6152136188  
H,0.1919873782,-1.5447040966,-1.4414294174  
H,-2.0225516005,-0.3563975338,2.3238596685  
H,-1.9062262427,-2.4295994911,-1.4322253199  
H,-4.3209908601,-2.1304016068,-1.6908797317  
H,-4.4818022815,-0.0846783658,2.0812327361  
H,2.4427805352,-0.9226847407,-2.1973680798  
H,1.9459270876,-2.7302662476,1.6643503231  
H,4.390310826,-2.8963726817,1.8968875516  
H,4.8901048546,-1.1295923059,-1.9769536399  
O,-5.9132210252,-0.8568934345,0.1569240858  
C,-6.6109183989,-1.3384572192,-0.9854996647  
H,-7.65068298,-1.07051179,-0.8264910902  
H,-6.2474813614,-0.8676596357,-1.9009444295  
H,-6.5230107286,-2.4226819737,-1.0780647101  
C,6.3195491387,-2.0975541441,0.1402470028  
H,6.6010804624,-2.9530238538,0.7533287896  
H,6.8092928311,-2.1993373408,-0.827524791  
H,6.7175883189,-1.201764537,0.6201357344

### Stilbene 4

C,-0.8594189567,-1.4345644624,0.5676415454  
C,0.0174948525,-1.3681680471,-0.4591853892  
C,1.4711105245,-1.2914746478,-0.3091268226  
C,-2.3110717558,-1.537280923,0.42682635  
C,-3.1472760959,-1.0644886537,1.4559985707  
C,-2.9183826109,-2.102149808,-0.7040566586

C,0.3493082255,3.1334091902,-0.371885442  
C,-1.8493611332,2.9819994009,0.6346973091  
C,-0.781835442,3.7593797047,0.1652447032  
C,1.67909658,-3.3923019678,0.5744088256  
C,-0.4280575792,-3.4786486246,-0.6004995219  
C,-0.3681760051,-4.8706212538,-0.5993983096  
C,0.7166690507,-5.5296483426,-0.0154539879  
C,1.7433759237,-4.7844365057,0.5679252016  
H,-1.553077499,-1.0312306666,0.0356240272  
H,1.4911077863,-0.7438149928,0.1589476922  
H,-2.608912833,1.0063199617,0.946202763  
H,1.2623932188,1.267001001,-0.8884809219  
H,1.1745410016,3.7092307616,-0.7650823669  
H,-2.7163077841,3.4883840796,1.0382977868  
H,2.4746637209,-2.816594027,1.0340775188  
H,-1.2516422535,-2.9750393283,-1.0917628  
H,-1.1572946642,-5.4418493253,-1.0724864965  
H,0.7654890591,-6.6111072612,-0.0241802949  
H,2.59164719,-5.2866036627,1.016147045  
O,-0.9523830506,5.1149352787,0.2698410307  
C,0.1166340816,5.9290714143,-0.1975361514  
H,-0.1981918842,6.9528253301,-0.0215654711  
H,1.0380633933,5.72971177,0.3528850941  
H,0.2940193802,5.779521346,-1.2642935463

#### Stilbene 5

C,0.183204,0.59845,-0.098072  
C,-0.749474,-0.37895,-0.038922  
C,-2.195067,-0.171363,-0.07732  
C,1.627353,0.369065,-0.077437  
C,2.483441,1.374709,0.405571  
C,2.202412,-0.830216,-0.536774  
C,3.575563,-1.042588,-0.474458  
C,3.861227,1.19082,0.46539  
C,4.382715,-0.023248,0.02613  
C,-3.047701,-1.146561,0.458433  
C,-2.781995,0.979474,-0.639922  
C,-4.156903,1.156065,-0.628909  
C,-4.992947,0.176478,-0.07194  
C,-4.433979,-0.985411,0.471103  
H,-0.138428,1.635369,-0.118035  
H,-0.41891,-1.406812,0.086123  
H,2.058255,2.310337,0.749448  
H,1.568061,-1.596656,-0.963638  
H,4.026322,-1.958837,-0.825906  
H,4.523995,1.956229,0.840825  
H,-2.619546,-2.046272,0.886269  
H,-2.156272,1.729078,-1.108681

C,-4.3063768026,-2.1605512808,-0.83418718  
C,-4.5286655067,-1.122103838,1.3440681494  
C,-5.1177455863,-1.6673389416,0.1948783773  
C,2.2407334396,-0.6824340286,-1.3151757129  
C,2.1357695374,-1.8082063796,0.8175161798  
C,3.5152608947,-1.6893877597,0.9505084904  
C,4.2577691512,-1.0637995766,-0.0551886023  
C,3.6224678101,-0.5682474752,-1.1962622055  
H,-0.4795545064,-1.3691506916,1.5837578738  
H,-0.3645861365,-1.3253145877,-1.4749760834  
H,-2.7026108933,-0.6354241178,2.3468256981  
H,-2.3007131492,-2.5236409278,-1.4879956801  
H,-4.7345642329,-2.6099703502,-1.7183534968  
H,-5.1761562834,-0.7548212896,2.1293415045  
H,1.7444871857,-0.2868403893,-2.193796061  
H,1.5683694729,-2.3250863033,1.581231144  
H,4.0169597266,-2.0858983691,1.823084419  
H,4.2029051921,-0.0876130725,-1.9721096642  
O,-6.4867320738,-1.6776520379,0.1863906985  
C,-7.1138305569,-2.2246287742,-0.9682942438  
H,-8.1806442709,-2.1334839788,-0.7907618952  
H,-6.8433909541,-1.6685770282,-1.8678328156  
H,-6.8537826728,-3.2764006818,-1.1013562115  
C,5.7480784605,-1.011757434,0.0500713788  
F,6.1597052376,-0.9169914713,1.3369282252  
F,6.3261249678,-2.1248910275,-0.4652487524  
F,6.266126592,0.0452893547,-0.61928313

#### Stilbene 6

C,-0.4208626264,-1.5066320158,-0.3954773716  
C,0.5166450565,-1.50973054,0.5792435463  
C,1.9582133528,-1.5801193404,0.3444108401  
C,-1.8631057923,-1.4171309304,-0.1803988742  
C,-2.4232632031,-0.8601535646,0.986431391  
C,-3.7968484755,-0.8219653825,1.1695441055  
C,-4.6577854823,-1.3218228818,0.1807658596  
C,-4.1250551789,-1.8577836107,-0.9966688562  
C,-2.7399504621,-1.8952232644,-1.1640899147  
C,2.7974958308,-2.1171508212,1.3366418371  
C,4.1699594438,-2.2253257713,1.1427459556  
C,4.7342177255,-1.7841588127,-0.063821214  
C,3.916100283,-1.2294866546,-1.0609742377  
C,2.5472842549,-1.1183347074,-0.8470394286  
H,-0.0990130645,-1.6175558348,-1.4276711259  
H,0.1989534703,-1.5045688857,1.6176236476  
H,-1.7766161691,-0.4345650703,1.7439827984  
H,-4.2352982982,-0.3895692336,2.059376222  
H,-4.7636602146,-2.241839432,-1.7786769675  
H,-2.332371525,-2.3174515438,-2.075935229  
H,1.9279844937,-0.6507399621,-1.6021056004  
H,4.361184302,-0.8700907055,-1.9798777239

H,-4.61615,2.033427,-1.065188  
H,-5.053306,-1.760312,0.898678  
N,5.834421,-0.233285,0.083077  
O,6.534285,0.692345,0.527908  
O,6.275788,-1.324502,-0.315637  
O,-6.331842,0.453766,-0.123414  
C,-7.207816,-0.525226,0.425302  
H,-8.208655,-0.127119,0.292589  
H,-7.119189,-1.476833,-0.101943  
H,-7.013177,-0.680451,1.488024

#### Stilbene 7

C,0.4622768227,-1.6440779851,-0.4931039275  
C,-0.4623095697,-1.644070369,0.4931054777  
C,-1.9106088698,-1.6536839259,0.2844394447  
C,1.9105760198,-1.6537060531,-0.2844378508  
C,2.7592143465,-1.1322094988,-1.2748900868  
C,2.500342782,-2.1834462504,0.8764392355  
C,3.8806125718,-2.1463401948,1.0533900506  
C,4.1399995016,-1.1049938711,-1.0952789963  
C,4.7256626981,-1.61161665,0.0714274607  
C,-2.759241576,-1.1321729026,1.2748888777  
C,-2.5003813392,-2.1834239846,-0.8764348054  
C,-3.8806507271,-2.1463039828,-1.0533858306  
C,-4.7256950904,-1.6115660525,-0.0714261149  
C,-4.140026436,-1.1049433372,1.0952776299  
H,0.1261526748,-1.5918808186,-1.5250214186  
H,-0.1261848624,-1.5918713262,1.5250226915  
H,2.3268084956,-0.7337563926,-2.1861129413  
H,1.8749929393,-2.6444752982,1.6314578569  
H,4.3134694557,-2.5674180146,1.954278346  
H,4.7728100921,-0.6954996272,-1.8749462476  
H,-2.3268314324,-0.7337195761,2.1861095988  
H,-1.8750364646,-2.6444638301,-1.6314509484  
H,-4.3135121481,-2.5673819632,-1.954271871  
H,-4.7728326136,-0.695438083,1.87494268  
C,6.2145643709,-1.5490979303,0.282682115  
H,6.7471346773,-1.5840047006,-0.66700526  
H,6.5016611177,-0.6261792029,0.7895831593  
H,6.558891157,-2.3823185624,0.8943341568  
C,-6.2145960868,-1.549032399,-0.2826811167  
H,-6.5589318631,-2.3822526109,-0.8943286697  
H,-6.7471667766,-1.5839283013,0.6670064427  
H,-6.5016828672,-0.6261133048,-0.789587138

#### Stilbene 9

C,-1.62976,0.457291,0.010648  
C,-0.722989,-0.545078,0.02319  
C,0.728197,-0.355108,0.026149  
C,-3.081377,0.276004,0.025329  
C,-3.910433,1.277844,-0.505482

H,4.8057769449,-2.6458430775,1.9110913072  
H,2.3616095777,-2.4642655172,2.2662687108  
C,6.1491173316,-1.8898056309,-0.2754268763  
N,7.316570016,-1.9780204788,-0.4505877011  
O,-5.9926585991,-1.2249722952,0.4656696813  
C,-6.8930429185,-1.7150630566,-0.5221514261  
H,-7.8864541063,-1.5532162985,-0.1162701753  
H,-6.7874934137,-1.1686695443,-1.46116591  
H,-6.7406955535,-2.7804661353,-0.7040762697

#### Stilbene 8

C,0.6043334444,-1.600061396,-0.4263711949  
C,-0.3061016883,-1.8340008632,0.5434602601  
C,-1.7143270831,-2.1675374145,0.3149174028  
C,2.0118462907,-1.2646838396,-0.2020567585  
C,2.9536118024,-1.5318572867,-1.2091578104  
C,2.4698330354,-0.6710882115,0.9869794659  
C,3.8211865898,-0.3911994056,1.1673890403  
C,4.304007828,-1.244682508,-1.0245336392  
C,4.7632395856,-0.6756302203,0.1692259431  
C,-2.6598641394,-1.8791657052,1.3133496418  
C,-2.1593982935,-2.7854038187,-0.8669048949  
C,-3.5105948109,-3.0661115752,-1.0566859685  
C,-4.4424445398,-2.7573748321,-0.0622697539  
C,-4.0110766026,-2.165173737,1.1260682416  
H,0.2964187843,-1.6832922196,-1.4649601052  
H,-0.0002315331,-1.7497473193,1.5824239522  
H,2.6213184038,-1.9813214424,-2.1384973521  
H,1.7622723688,-0.410453474,1.7647554011  
H,4.1509637414,0.0660445454,2.0939422229  
H,5.0117419065,-1.4705556445,-1.8145146609  
H,-2.3287633744,-1.4151940239,2.2357240009  
H,-1.4416461392,-3.063517052,-1.6288337805  
H,-3.8352581246,-3.5445157797,-1.972383694  
H,-5.4908029201,-2.9837904044,-0.2093280625  
H,-4.7245946327,-1.9292907803,1.9057057806  
C,6.2151330151,-0.3247886251,0.3546353854  
H,6.8543214781,-0.9775829718,-0.238601445  
H,6.4148027362,0.7031684306,0.047167191  
H,6.5107998711,-0.4200374254,1.3989091908

#### Stilbene 10

C,0.279511,-0.534729,0.078817  
C,1.189408,0.460557,-0.017537  
C,2.640206,0.276852,0.004724  
C,-1.170116,-0.339538,0.071481  
C,-2.00789

C,-3.691048,-0.868336,0.568033  
C,-5.074503,-1.017984,0.536048  
C,-5.294314,1.124133,-0.528586  
C,-5.901248,-0.025562,-0.008217  
C,1.558781,-1.353403,-0.511115  
C,1.330286,0.802334,0.551218  
C,2.710273,0.971538,0.50935  
C,3.515024,-0.027346,-0.046313  
C,2.941105,-1.197652,-0.548457  
H,-1.275046,1.482148,-0.057919  
H,-1.07355,-1.572337,-0.013869  
H,-3.461222,2.176315,-0.914025  
H,-3.079911,-1.63074,1.035964  
H,-5.524008,-1.905604,0.967452  
H,-5.912761,1.911233,-0.945429  
H,1.110493,-2.255251,-0.911619  
H,0.713033,1.561914,1.014253  
H,3.164149,1.867303,0.911709  
H,3.569551,-1.967937,-0.974532  
C,-7.393998,-0.208448,-0.065314  
H,-7.907768,0.751793,-0.041962  
H,-7.692015,-0.721559,-0.981242  
H,-7.748433,-0.802532,0.776239  
C,5.002518,0.119441,-0.014997  
F,5.383451,1.41489,-0.12011  
F,5.528079,-0.350986,1.142988  
F,5.599404,-0.560875,-1.022202

#### Stilbene 11

C,-0.199652,0.479393,0.199333  
C,0.723635,-0.432264,-0.177523  
C,2.173272,-0.240889,-0.123825  
C,-1.647952,0.279727,0.138356  
C,-2.494981,1.398544,0.051851  
C,-2.236068,-0.997494,0.1856  
C,-3.61416,-1.156395,0.103282  
C,-3.876216,1.257276,-0.023392  
C,-4.441271,-0.026485,-0.000727  
C,3.013731,-1.365407,-0.080614  
C,2.771792,1.030978,-0.137916  
C,4.154934,1.164892,-0.064116  
C,4.993234,0.042968,-0.002914  
C,4.397426,-1.223917,-0.010644  
H,0.131685,1.452004,0.550707  
H,0.387439,-1.402585,-0.532714  
H,-2.059157,2.390644,0.029842  
H,-1.609313,-1.872294,0.303818  
H,-4.058096,-2.142806,0.142043  
H,-4.517911,2.125754,-0.096765  
H,2.573678,-2.356521,-0.087289  
H,2.154438,1.916719,-0.226232

7,-1.378095,-0.371928  
C,-1.76687,0.858615,0.504996  
C,-3.145459,1.036701,0.456501  
C,-3.390372,-1.228116,-0.417859  
C,-3.93451,-0.014877,-0.004714  
C,3.468451,1.234968,-0.602726  
C,3.249678,-0.825827,0.628084  
C,4.632652,-0.980056,0.601476  
C,5.458911,-0.032738,-0.018754  
C,4.85181,1.076519,-0.620381  
H,0.626282,-1.562925,0.121336  
H,0.837493,1.478005,-0.166074  
H,-1.565066,-2.31275,-0.695543  
H,-1.145166,1.651558,0.900934  
H,-3.613248,1.951663,0.788482  
H,-4.039772,-2.018853,-0.762911  
H,3.019152,2.101693,-1.074768  
H,2.639618,-1.550207,1.154238  
H,5.082387,-1.834192,1.095598  
H,5.46986,1.829038,-1.097258  
N,-5.391687,0.159336,-0.046965  
O,-6.074886,-0.794387,-0.456818  
O,-5.853409,1.250339,0.328393  
C,6.950974,-0.222708,-0.068431  
H,7.308103,-0.752477,0.813911  
H,7.243633,-0.804083,-0.944419  
H,7.466621,0.735399,-0.119855

#### Stilbene 12

C,0.4773246324,-1.7942148284,0.478263148  
C,-0.4771961814,-1.7942622162,-0.4782565942  
C,-1.9191536938,-1.8038215831,-0.2224556175  
C,1.9192827084,-1.8036974818,0.2224624738  
C,2.794226179,-1.2569154058,1.1762278182  
C,2.4665056681,-2.3492491876,-0.9520175327  
C,3.8405276643,-2.3115505711,-1.1794099925  
C,4.1693815139,-1.2261407318,0.9520831213  
C,4.6976263455,-1.7498167865,-0.2296302514  
C,-2.7941299987,-1.2571296653,-1.1762425229  
C,-2.4663439107,-2.3493599916,0.9520458225  
C,-3.8403681889,-2.3117351162,1.1794366976  
C,-4.6975006033,-1.7500902628,0.2296348039  
C,-4.1692872001,-1.2264289271,-0.9520991382  
H,0.1741871751,-1.7416922505,1.5202652168  
H,-0.1740618485,-1.7417621367,-1.5202607064  
H,2.3862789749,-0.844141559,2.0920826941  
H,1.8134165552,-2.8231390073,-1.6746207561  
H,4.2457602144,-2.7386596751,-2.0883205139  
H,4.8270625764,-0.7958633989,1.6969825447  
H,5.7657637665,-1.7298498228,-0.4047363436  
H,-2.3862075696,-0.8443673158,-2.0921136154

H,4.595108,2.155765,-0.083884  
H,5.023948,-2.108157,0.024793  
C,-5.864957,-0.185643,-0.075985  
N,-7.03975,-0.317166,-0.138725  
C,6.485972,0.198576,0.107584  
H,6.826708,1.090989,-0.416124  
H,6.795119,0.288742,1.150312  
H,7.002173,-0.661244,-0.317527

#### Stilbene 13

C,-0.2482726865,-1.5973440741,-0.5682072101  
C,-1.1299265452,-1.8423566573,0.4263136529  
C,-2.5393869225,-2.1869427824,0.230766694  
C,1.1642922462,-1.270382591,-0.3670653105  
C,1.8428742455,-0.5071920754,-1.3324591928  
C,1.8758064268,-1.6949930772,0.7692042039  
C,3.208477075,-1.3404604009,0.9510119913  
C,3.1787254556,-0.1556222209,-1.1639839886  
C,3.8578534707,-0.5653044956,-0.014166041  
C,-3.4694068826,-1.8852413733,1.2397696202  
C,-2.9989655943,-2.8178493128,-0.9384824306  
C,-4.3525825288,-3.1015394765,-1.105520044  
C,-5.2697395222,-2.7808510471,-0.1013216029  
C,-4.8224241551,-2.1751610537,1.0745874696  
H,-0.6010174414,-1.5959062867,-1.595412492  
H,-0.7989528389,-1.7401186346,1.4561968171  
H,1.3104866498,-0.1799252707,-2.2179682053  
H,1.3861584338,-2.3248561567,1.5012524374  
H,3.7467399408,-1.6679806249,1.830371505  
H,3.6878081382,0.4416147048,-1.9082599411  
H,-3.1253287687,-1.4099850593,2.1514942848  
H,-2.2894236884,-3.1065789302,-1.7042939308  
H,-4.6904218917,-3.5907390896,-2.0105648716  
H,-6.3198033334,-3.0101349969,-0.2303504407  
H,-5.5255404987,-1.9306082019,1.8608269896  
C,5.3120914443,-0.2554062258,0.1428502813  
F,5.6547609352,0.8946465664,-0.4843231834  
F,5.6620001709,-0.126376422,1.4448128243  
F,6.0918036657,-1.2348897336,-0.377620886

#### Stilbene 15

C,-0.3313766861,-1.6412642648,0.5405702505  
C,0.5681920147,-1.8446007276,-0.4477765088  
C,1.988675722,-2.1316092585,-0.2423222927  
C,-1.74672707,-1.3385239942,0.3285937314  
C,-2.6839930694,-1.6770193096,1.3204092207  
C,-2.2108928702,-0.707147225,-0.8398160898  
C,-3.5653004132,-0.4617055046,-1.032459402  
C,-4.0410988679,-1.429364101,1.1472225757  
C,-4.487049878,-0.8226155621,-0.0367305714  
C,2.6963611852,-2.8449804237,-1.2244413071

H,-1.8132263454,-2.8231820901,1.674667739  
H,-4.2455751003,-2.7388328295,2.0883640023  
H,-5.7656392368,-1.730180692,0.4047400343  
H,-4.8269940964,-0.796220467,-1.6970155315

#### Stilbene 14

C,0.0132714023,-1.6134463631,0.578858766  
C,-0.8771437042,-1.8470975988,-0.4109381693  
C,-2.2948539579,-2.1499355647,-0.2090251485  
C,1.4326169152,-1.3268879616,0.3700055402  
C,2.1374774314,-0.5779241006,1.3287308507  
C,2.1302601779,-1.7852478227,-0.7625276859  
C,3.4710274519,-1.4718807664,-0.9592817842  
C,3.4819271386,-0.2620721356,1.1598212954  
C,4.124435798,-0.7140708577,0.0102068887  
C,-3.2161718996,-1.8409334371,-1.2239205232  
C,-2.7708662972,-2.7469590631,0.9714998085  
C,-4.1315972028,-2.9908976803,1.1426774654  
C,-5.0398719934,-2.6631050092,0.1326537029  
C,-4.576453795,-2.0908460514,-1.0537260286  
H,-0.3367322512,-1.5880834553,1.6065508051  
H,-0.5458168933,-1.7672601609,-1.4428052102  
H,1.6182160329,-0.2297196785,2.2138857322  
H,1.6213998443,-2.4087216027,-1.4866800723  
H,4.0160908638,-1.8202155259,-1.8240096812  
H,4.0285876281,0.3178380398,1.8884549535  
H,-2.8594077574,-1.3916970464,-2.1438988974  
H,-2.0696738722,-3.0415776697,1.742757091  
H,-4.4825585469,-3.4545522636,2.0561014081  
H,-6.0957342527,-2.8614006038,0.2654154406  
H,-5.2728162944,-1.841289132,-1.8443444683  
N,5.5433051157,-0.3894087525,-0.1828115351  
O,6.1060127559,0.2826118651,0.6981058822  
O,6.0947631622,-0.8052286012,-1.2159184262

#### Stilbene 16

C,0.893982,-0.482359,0.096035  
C,0.000791,0.528569,0.00801  
C,-1.452604,0.360815,0.037438  
C,2.346971,-0.313129,0.07986  
C,3.161444,-1.366163,-0.372518  
C,2.966884,0.87335,0.51269  
C,4.348153,1.025655,0.456631  
C,4.545955,-1.240617,-0.427409  
C,5.114394,-0.038747,-0.013696  
C,-2.270884,1.317253,-0.587645

C,2.6767908848,-1.7123918032,0.9098058749  
C,4.0210037682,-2.0317108641,1.0874537826  
C,4.7090338719,-2.7566291797,0.1108925864  
C,4.0426260938,-3.1586988487,-1.0484093683  
H,-0.0119455412,-1.7488292089,1.5729614496  
H,0.2236385668,-1.841138479,-1.4783499059  
H,-2.3407041484,-2.151255889,2.2324868102  
H,-1.5009483624,-0.3889167791,-1.5928213988  
H,-3.9142401205,0.0263318361,-1.9333706711  
H,-4.7551159777,-1.6993283974,1.9144855682  
H,2.1797030674,-3.1628644262,-2.1230474209  
H,2.1622387179,-1.1153034392,1.6527852719  
H,4.5381519659,-1.6987516948,1.9786294102  
H,4.5707214876,-3.7138448622,-1.8134009388  
C,-5.8847172117,-0.5606748965,-0.2263370683  
N,-7.0381765242,-0.3454287004,-0.3832104145  
H,5.7557553948,-2.9961489965,0.248037826

#### Stilbene 17

C,0.929628,0.489626,-0.011135  
C,0.026244,-0.512713,0.077831  
C,-1.42465,-0.328647,0.070657  
C,2.380518,0.3082,0.010108  
C,3.205111,1.264324,-0.608788  
C,2.988383,-0.793993,0.638828  
C,4.367906,-0.95941,0.615107  
C,4.58712,1.116396,-0.633676  
C,5.173718,-0.002674,-0.023105  
C,-2.252075,-1.373188,-0.378253  
C,-2.029962,0.863581,0.508705  
C,-3.409893,1.029434,0.461176  
C,-4.189415,-0.026686,-0.006169  
C,-3.635474,-1.233638,-0.424842  
H,0.574939,1.506327,-0.154069  
H,0.380194,-1.538957,0.11285  
H,2.751993,2.125915,-1.085103  
H,2.376382,-1.513583,1.168011  
H,4.829456,-1.8081,1.103105  
H,5.213656,1.854183,-1.1178  
H,-1.801304,-2.302812,-0.705237  
H,-1.415543,1.660211,0.908717  
H,-3.885979,1.938725,0.796881  
H,-4.278503,-2.027805,-0.773898  
C,6.598896,-0.164841,-0.040757  
N,7.775069,-0.299403,-0.056188  
N,-5.648649,0.135837,-0.048587  
O,-6.118204,1.221809,0.331136

C,-2.066666,-0.725184,0.686546  
C,-3.449223,-0.875659,0.669791  
C,-4.243405,0.079665,0.028728  
C,-3.655279,1.178338,-0.602393  
H,0.529286,-1.504527,0.13797  
H,0.365108,1.54107,-0.140823  
H,2.699483,-2.291633,-0.695654  
H,2.362534,1.676489,0.914989  
H,4.835106,1.930686,0.788228  
H,5.178884,-2.041651,-0.779215  
H,-1.812414,2.169203,-1.076049  
H,-1.458404,-1.441636,1.224262  
H,-3.914926,-1.70891,1.178519  
H,-4.276355,1.919717,-1.086417  
N,6.574802,0.10913,-0.06492  
O,7.236967,-0.85596,-0.482162  
O,7.057724,1.190637,0.310824  
C,-5.725165,-0.114386,-0.040494  
F,-6.080483,-0.849676,-1.121974  
F,-6.199326,-0.762735,1.049347  
F,-6.384805,1.064129,-0.130717

#### Stilbene 18

C,-0.447557,0.524305,-0.041203  
C,0.443895,-0.49155,-0.042589  
C,1.897985,-0.324527,-0.037071  
C,-1.901411,0.356226,-0.061528  
C,-2.721107,1.358595,0.484418  
C,-2.514707,-0.776385,-0.625886  
C,-3.897492,-0.924803,-0.601501  
C,-4.105778,1.222342,0.505654  
C,-4.692841,0.07814,-0.039652  
C,2.707383,-1.33394,0.511289  
C,2.520676,0.820905,-0.564082  
C,3.902921,0.967232,-0.514627  
C,4.687354,-0.041588,0.052121  
C,4.091642,-1.199568,0.55739  
H,-0.081914,1.544982,0.024536  
H,0.077098,-1.513156,-0.001848  
H,-2.263439,2.245755,0.906405  
H,-1.904983,-1.532774,-1.103903  
H,-4.362212,-1.795024,-1.045072  
H,-4.727673,1.999639,0.928424  
H,2.241899,-2.226324,0.913251  
H,1.919085,1.588088,-1.035199  
H,4.37416,1.853107,-0.918776  
H,4.704943,-1.977249,0.991867  
C,-6.174712,-0.108999,0.040137  
F,-6.834151,1.07326,0.034902  
F,-6.646652,-0.841243,-0.996387  
F,-6.534495,-0.756261,1.175291

O,-6.322616,-0.822281,-0.462908

C,6.177858,0.081473,0.030401  
F,6.577304,1.371209,0.132309  
F,6.755833,-0.603606,1.044806  
F,6.70198,-0.402714,-1.121957

### Stilbene 19

C,-1.371188,-0.474438,-0.047089  
C,-0.475197,0.537918,-0.049511  
C,0.977674,0.364024,-0.06642  
C,-2.82366,-0.301628,-0.04396  
C,-3.63912,-1.312449,0.494474  
C,-3.442011,0.846627,-0.571497  
C,-4.822384,1.001199,-0.525542  
C,-5.02195,-1.176182,0.539861  
C,-5.61861,-0.01223,0.031795  
C,1.799994,1.368302,0.472239  
C,1.587446,-0.775842,-0.620114  
C,2.969599,-0.928772,-0.592487  
C,3.767704,0.076022,-0.037785  
C,3.184054,1.227007,0.496829  
H,-1.008851,-1.497272,0.000403  
H,-0.836401,1.560598,0.010544  
H,-3.178105,-2.209107,0.892008  
H,-2.837011,1.612943,-1.039577  
H,-5.291742,1.886092,-0.935589  
H,-5.641199,-1.957028,0.96187  
H,1.344956,2.260729,0.885868  
H,0.975954,-1.534152,-1.092824  
H,3.431906,-1.804345,-1.027951  
H,3.80819,2.005559,0.913917  
C,-7.044673,0.138791,0.071431  
N,-8.221408,0.263985,0.10503  
C,5.24896,-0.115903,0.045722  
F,5.719358,-0.857735,-0.984517  
F,5.912358,1.063911,0.032463  
F,5.604098,-0.755797,1.186328

### Stilbene 21

C,0.5433631058,0.4023712015,0.0088983102  
C,-0.5434272021,-0.4024065578,0.0088983102  
C,-0.4977840716,-1.8640434152,0.0162295004  
C,0.4977199753,1.8640080589,0.0162295004  
C,1.5759695466,2.5916135693,-0.5175331737  
C,-0.5921700809,2.5764095015,0.5491988794  
C,-0.6253133848,3.9652159671,0.5131034186  
C,1.5608237871,3.9812683142,-0.5532492374  
C,0.4535949989,4.6737544694,-0.0398641083  
C,-1.5760336429,-2.5916489256,-0.5175331737  
C,0.5921059846,-2.5764448578,0.5491988794  
C,0.6252492885,-3.9652513234,0.5131034186  
C,-0.4536590952,-4.6737898257,-0.0398641083

### Stilbene 20

C,0.4504091642,-1.4533558658,-0.5043215702  
C,-0.4503832007,-1.4533529881,0.5043265868  
C,-1.9017155533,-1.4602929361,0.3245406197  
C,1.901741561,-1.4602845149,-0.324535524  
C,2.7253413741,-0.9235791812,-1.3301142736  
C,2.5113236199,-1.996913867,0.8245687856  
C,3.8916784562,-1.9620777779,0.9892391913  
C,4.1090409012,-0.8873719183,-1.1914404156  
C,4.6674275556,-1.4060399496,-0.0259961887  
C,-2.725318787,-0.9235813902,1.330113252  
C,-2.5112941921,-1.9969392703,-0.8245575735  
C,-3.8916492504,-1.9621138554,-0.9892283763  
C,-4.6674018936,-1.4060693999,0.0260006662  
C,-4.1090185448,-0.8873845264,1.1914389813  
H,0.0934360594,-1.3992699132,-1.5287254533  
H,-0.0934104407,-1.3992530846,1.5287298534  
H,2.2711932095,-0.5197061042,-2.2272931394  
H,1.9000538691,-2.4636721782,1.5865597071  
H,4.3710740695,-2.3729438953,1.8653335203  
H,4.7491746173,-0.4716313244,-1.9552623879  
H,-2.2711731964,-0.519695193,2.2272875145  
H,-1.9000214665,-2.4637023707,-1.586543175  
H,-4.3710422451,-2.3729930136,-1.8653180222  
H,-4.7491549105,-0.4716393065,1.9552562151  
N,6.1270662799,-1.3758221543,0.1348922186  
O,6.7975104759,-0.8809383952,-0.7868543259  
O,6.6004846818,-1.8457087183,1.1833381645  
N,-6.1270408105,-1.3758627409,-0.1348880854  
O,-6.6004562176,-1.845764272,-1.1833286756  
O,-6.7974881605,-0.8809727489,0.7868528185

### Stilbazole 22

C,-0.5638017781,-0.4937464829,0.  
C,0.5446817729,-1.2674651073,0.  
C,0.5704897607,-2.7296253023,0.  
C,-0.610968593,0.9669523762,0.  
C,-1.8678018292,1.6028753096,0.  
C,0.530071792,1.7846829738,0.  
C,0.4319210943,3.1752922079,0.  
C,-1.9819368833,2.9852569186,0.  
C,-0.8304770262,3.7828148151,0.  
C,1.8049029231,-3.3966696081,0.  
C,-0.5749248554,-3.5429312183,0.  
C,-0.4335734498,-4.9271329462,0.  
N,0.75038,-5.5696987792,0.

C,-1.5608878834,-3.9813036705,-0.5532492374  
H,1.5308323144,-0.04684077,-0.0453836035  
H,-1.5308964107,0.0468054137,-0.0453836035  
H,2.4288327065,2.056867882,-0.9190640899  
H,-1.4082803761,2.0376770684,1.0140790871  
H,-1.4655709665,4.5072611,0.9273455433  
H,2.3925866782,4.5329123708,-0.9717093072  
H,-2.4288968028,-2.0569032383,-0.9190640899  
H,1.4082162798,-2.0377124247,1.0140790871  
H,1.4655068702,-4.5072964563,0.9273455433  
H,-2.3926507745,-4.5329477271,-0.9717093072  
C,0.4276517416,6.1077557392,-0.0694925009  
N,0.4056164985,7.291162981,-0.0948617849  
C,-0.4277158379,-6.1077910955,-0.0694925009  
N,-0.4056805948,-7.2911983373,-0.0948617849

### Stilbazole 23

C,-0.2977594579,0.375146321,0.  
C,-0.4825133281,-0.9637660031,0.  
C,-1.7731204418,-1.6521076396,0.  
C,0.9842248208,1.0785988729,0.  
C,0.9806663219,2.482992933,0.  
C,2.2317319213,0.4260980776,0.  
C,3.4143487877,1.1561322912,0.  
C,2.1703345212,3.2088381435,0.  
C,3.4086823653,2.5596517528,0.  
C,-1.8050754198,-3.0547517197,0.  
C,-3.0181071018,-1.0016022616,0.  
C,-4.1865207097,-1.7571809082,0.  
N,-4.2199024887,-3.1038254699,0.  
C,-3.0269782068,-3.7237127963,0.  
H,-1.1703640191,1.0219580606,0.  
H,0.3838295213,-1.6177581847,0.  
H,0.0320057772,3.0085433534,0.  
H,2.2817376235,-0.6556752093,0.  
H,4.3626389277,0.6295625339,0.  
H,2.1353070836,4.2923929974,0.  
H,-0.8807402791,-3.6201640536,0.  
H,-3.0882279673,0.0780938256,0.  
H,-5.1514482677,-1.2624178861,0.  
H,-3.0556770047,-4.8077446895,0.  
C,4.701767147,3.3295512369,0.  
H,4.5184350245,4.4028793673,0.  
H,5.3008499247,3.0904135274,0.8793790012  
H,5.3008499247,3.0904135274,-0.8793790012

C,1.8449071465,-4.7890712672,0.  
H,-1.5361218921,-0.9779837818,0.  
H,1.5213698227,-0.7935524764,0.  
H,-2.7668992799,0.9968531563,0.  
H,1.5178102183,1.3406119483,0.  
H,1.3366158389,3.7657447626,0.  
H,-2.9475723441,3.4733883443,0.  
H,2.729032344,-2.8308726992,0.  
H,-1.5684597024,-3.1144814703,0.  
H,-1.3132643267,-5.5612217797,0.  
H,2.7973700018,-5.3075668281,0.  
O,-1.0496780201,5.1336745766,0.  
C,0.1032784167,5.9686446565,0.  
H,-0.274566294,6.9860386966,0.  
H,0.7124800688,5.8044904988,0.8906991876  
H,0.7124800688,5.8044904988,-0.8906991876

### Stilbene 24

C,-0.2921500277,-0.6107770443,0.  
C,0.2912270334,0.6103549713,0.  
C,-0.3880627375,1.9030692166,0.  
C,0.3871408037,-1.9034910371,0.  
C,-0.3840232628,-3.0791108421,0.  
C,1.7863633913,-2.0573130386,0.  
C,2.3774642,-3.3136380587,0.  
C,0.1970878705,-4.34197569,0.  
C,1.5938765631,-4.4818715411,0.  
C,0.3831007392,3.0786886506,0.  
C,-1.7872859852,2.0568906605,0.  
C,-2.3783866305,3.3132151613,0.  
C,-1.5947988567,4.4814493735,0.  
C,-0.1980107756,4.34155391,0.  
H,-1.3769894635,-0.6699789511,0.  
H,1.3760665666,0.6695558427,0.  
H,-1.465772747,-2.9985722743,0.  
H,2.4287897024,-1.1852628182,0.  
H,3.4586659764,-3.3995140851,0.  
H,-0.4292664023,-5.2272033757,0.  
H,1.4648503107,2.9981509974,0.  
H,-2.4297111601,1.1848396394,0.  
H,-3.4595883468,3.3990922892,0.  
H,0.4283443821,5.2267809446,0.  
N,2.184669613,-5.7270146041,0.  
H,1.6296462584,-6.5606310333,0.  
H,3.1813734255,-5.8244285989,0.  
N,-2.185594048,5.7265914153,0.  
H,-3.1822971593,5.8240029727,0.  
H,-1.6305722331,6.5602099477,0.



**Table S2:** Cartesian coordinates for the optimised geometries of the cationic intermediates of the electrophilic bromination of substituted stilbenes and stilbazole calculated at the MP2/6-31G(d,p) level of theory.

**Stilbene 1**

C,-0.5384809018,1.3388380429,0.4884749325  
C,0.4502400982,0.8464090429,-0.4826020675  
C,1.6939490982,0.2899190429,-0.2186940675  
C,2.2720000982,0.2330710429,1.0905439325  
C,3.5180420982,-0.3059349571,1.2676239325  
C,4.2443220982,-0.8138799571,0.1542649325  
C,3.6931240982,-0.7676519571,-1.1510680675  
C,2.4403140982,-0.2286869571,-1.3224820675  
C,-1.5666819018,0.2420950429,0.4058819325  
C,-2.4885139018,0.1669020429,-0.6495700675  
C,-3.3851599018,-0.8940209571,-0.7331190675  
C,-3.3335179018,-1.9236349571,0.2215379325  
C,-2.3962869018,-1.8611819571,1.2712969325  
C,-1.5094579018,-0.8026609571,1.3494049325  
H,-0.1593289018,1.4588220429,1.4993549325  
H,0.1170130982,0.8820340429,-1.5168750675  
H,2.0029230982,-0.1874649571,-2.3130470675  
H,4.2398330982,-1.1487789571,-2.0001860675  
H,3.9870040982,-0.3578029571,2.2406689325  
H,1.7361270982,0.6254910429,1.9438179325  
H,-0.7979849018,-0.7602729571,2.1666249325  
H,-2.3895499018,-2.6607059571,1.9998219325  
H,-4.1054409018,-0.9137869571,-1.5373260675  
H,-2.5530249018,0.9784660429,-1.3637700675  
O,5.4344780982,-1.3064679571,0.4513529325  
C,6.2673980982,-1.8445589571,-0.6050240675  
H,5.7696350982,-2.6874269571,-1.0791820675  
H,6.4984250982,-1.0669979571,-1.3295950675  
H,7.1683360982,-2.1719919571,-0.1018880675  
O,-4.1439059018,-3.0033699571,0.2414309325  
C,-5.1458949018,-3.1008609571,-0.7789620675  
H,-5.8326259018,-2.2560699571,-0.7291410675  
H,-5.6774169018,-4.0214929571,-0.5676940675  
H,-4.6899189018,-3.1547689571,-1.7675800675  
Br,-1.1694559018,3.0993280429,-0.0837520675

**Stilbene 3**

C,-0.7538829218,-0.5232872415,0.802109523  
C,0.3093257656,-1.3578310703,1.3953271652  
C,0.4460110779,-2.6407086877,0.6297155114  
C,-0.6850138243,0.8046073768,0.4287505712  
C,-1.8531618079,1.4105893513,-0.1487446697  
C,0.492172644,1.6046208511,0.5992822238  
C,0.5040340024,2.9246427269,0.2277142076  
C,-1.8448756851,2.7242912523,-0.5266245596

**Stilbene 2**

C,-0.189196,0.423784,0.594483  
C,0.780452,0.751833,-0.467629  
C,1.98127,-0.132382,-0.301395  
C,-1.507698,0.034521,0.455119  
C,-2.256172,-0.270972,1.642779  
C,-2.16321,-0.064034,-0.815335  
C,-3.481258,-0.434746,-0.898866  
C,-3.569086,-0.644617,1.564964  
C,-4.200483,-0.730744,0.293843  
C,2.148899,-1.202124,-1.190487  
C,2.870403,0.02597,0.771116  
C,3.927519,-0.865195,0.927317  
C,4.111186,-1.939916,0.043878  
C,3.211619,-2.086509,-1.020846  
H,0.217907,0.481608,1.60109  
H,0.374638,0.684041,-1.473302  
H,-1.764872,-0.19864,2.605389  
H,-1.623115,0.164168,-1.724061  
H,-3.962983,-0.498722,-1.862791  
H,-4.157054,-0.878434,2.441621  
H,1.466187,-1.330793,-2.023275  
H,2.76801,0.872006,1.440265  
H,4.620124,-0.728359,1.749279  
H,3.341276,-2.903902,-1.720093  
O,-5.466263,-1.095074,0.327395  
C,-6.219678,-1.213032,-0.907555  
H,-7.209187,-1.518498,-0.59246  
H,-6.260758,-0.24965,-1.410004  
H,-5.771713,-1.972276,-1.544067  
C,5.281712,-2.870627,0.199208  
H,5.547105,-2.993911,1.247765  
H,5.060142,-3.852229,-0.215743  
H,6.156119,-2.477827,-0.321203  
Br,1.15916,2.670707,-0.176032

**Stilbene 4**

C,-1.077492,0.437673,0.589954  
C,-0.208467,0.999243,-0.46532  
C,1.190213,0.46928,-0.34402  
C,-2.333993,-0.115543,0.449138  
C,-2.995083,-0.610874,1.626199  
C,-3.009781,-0.212962,-0.812396  
C,-4.264279,-0.759125,-0.896413  
C,-4.242278,-1.163729,1.547015

C,-0.6671739081,3.5002624521,-0.3430678569  
C,1.5748161983,-2.8103513218,-0.1823021081  
C,-0.5606215569,-3.6163250585,0.6495338824  
C,-0.4264386661,-4.7605035888,-0.1334599975  
C,0.6993407147,-4.9305364488,-0.9448464187  
C,1.7015809624,-3.9586610638,-0.9635180905  
H,-1.6935478346,-1.0463174189,0.641237814  
H,1.2654211986,-0.850683164,1.4919865474  
H,-2.7450440929,0.8100891401,-0.2797872174  
H,1.3825780541,1.1743839718,1.037085167  
H,1.3960398643,3.516175084,0.3681330219  
H,-2.7086171278,3.2065059524,-0.9628724773  
H,2.3564032532,-2.0589810743,-0.1916025039  
H,-1.4112949575,-3.5044157218,1.3110772783  
H,-1.1950458294,-5.5215791133,-0.1068449061  
H,0.8012753047,-5.8236666534,-1.54690249  
H,2.5797164074,-4.0950240465,-1.580697799  
O,-0.7631718702,4.7537200589,-0.735086085  
C,0.3719853892,5.6479636987,-0.5940750325  
H,0.0206548122,6.5940664488,-0.9853726028  
H,0.6383111798,5.7452549097,0.4555595951  
H,1.2088096658,5.2796797135,-1.1824984  
Br,-0.3426014291,-1.6123182868,3.2501707067

#### Stilbene 5

C,0.208922,0.918353,0.491297  
C,-0.764304,0.349333,-0.465233  
C,-2.046454,-0.087973,-0.202468  
C,1.565399,0.29919,0.32219  
C,2.029563,-0.57244,1.316353  
C,2.333256,0.520033,-0.830619  
C,3.554946,-0.124892,-0.993222  
C,3.251527,-1.224519,1.168941  
C,3.985407,-0.991127,0.009954  
C,-2.811297,-0.611403,-1.299142  
C,-2.649546,-0.044992,1.101227  
C,-3.929091,-0.49026,1.278295  
C,-4.667184,-1.010851,0.173535  
C,-4.092617,-1.067028,-1.125901  
H,-0.118626,0.872192,1.526402  
H,-0.403555,0.281823,-1.488896  
H,1.444053,-0.736734,2.213486  
H,1.998423,1.228948,-1.578056  
H,4.172011,0.034408,-1.865199  
H,3.636721,-1.894322,1.923529  
H,-2.356698,-0.642493,-2.282287  
H,-2.104434,0.354607,1.945111  
H,-4.417581,-0.467329,2.242761

C,-4.895344,-1.245606,0.28541  
C,1.643373,-0.439662,-1.308187  
C,2.010974,0.810183,0.740303  
C,3.274537,0.240732,0.859214  
C,3.71777,-0.670037,-0.104957  
C,2.908822,-1.010494,-1.19047  
H,-0.650722,0.476676,1.589414  
H,-0.595228,0.862787,-1.471589  
H,-2.489121,-0.539235,2.581248  
H,-2.539084,0.160795,-1.711536  
H,-4.763497,-0.819332,-1.851672  
H,-4.762818,-1.544728,2.41466  
H,1.01627,-0.693805,-2.154958  
H,1.681751,1.550653,1.459135  
H,3.921327,0.512466,1.682192  
H,3.270796,-1.701216,-1.939357  
O,-6.092243,-1.790038,0.316426  
C,-6.863988,-1.926179,-0.90716  
H,-7.787305,-2.39518,-0.592425  
H,-7.060012,-0.944447,-1.33103  
H,-6.332771,-2.563358,-1.60981  
C,5.054961,-1.333458,0.066019  
F,5.937341,-0.512244,0.671893  
F,4.942275,-2.443531,0.829034  
F,5.577692,-1.706468,-1.120497  
Br,-0.335631,2.945765,-0.109301

#### Stilbene 6

C,-0.411325,0.306758,-0.473683  
C,0.599099,0.817069,0.473376  
C,1.898715,0.089668,0.304645  
C,-1.709438,-0.067078,-0.200528  
C,-2.29674,0.001444,1.107347  
C,-3.593997,-0.378716,1.295006  
C,-4.368193,-0.854394,0.19694  
C,-3.809601,-0.934447,-1.106326  
C,-2.509555,-0.545501,-1.290196  
C,2.277127,-0.831695,1.287697  
C,3.436986,-1.58279,1.135335  
C,4.220668,-1.417392,-0.014634  
C,3.847815,-0.490764,-1.000384  
C,2.688444,0.256212,-0.840067  
H,-0.063259,0.223924,-1.499572  
H,0.272863,0.806866,1.508726  
H,-1.723779,0.367,1.946911  
H,-4.070688,-0.335043,2.263526  
H,-4.392836,-1.291973,-1.93995  
H,-2.066781,-0.596143,-2.276815  
H,2.420921,0.999975,-1.579177  
H,4.469628,-0.359689,-1.874851  
H,3.740234,-2.289076,1.895332

H,-4.64932,-1.457904,-1.964003  
N,5.278496,-1.679451,-0.157927  
O,5.642728,-2.431605,0.75921  
O,5.90456,-1.45951,-1.206381  
O,-5.883143,-1.41269,0.469813  
C,-6.741424,-1.959872,-0.568117  
H,-7.662864,-2.203365,-0.055186  
H,-6.917146,-1.208648,-1.334008  
H,-6.28839,-2.855305,-0.986184  
Br,0.172633,2.84204,0.01041

#### Stilbene 7

C,-0.542471,0.056631,0.494829  
C,0.441919,0.496181,-0.503382  
C,1.79278,-0.101959,-0.297664  
C,-1.87419,-0.295181,0.284925  
C,-2.636603,-0.70061,1.420906  
C,-2.489987,-0.274796,-1.001709  
C,-3.812498,-0.643311,-1.124788  
C,-3.956886,-1.074367,1.271041  
C,-4.567935,-1.04882,0.000939  
C,2.285328,-0.978097,-1.272513  
C,2.532364,0.128224,0.870937  
C,3.75446,-0.51181,1.04921  
C,4.259799,-1.398679,0.085486  
C,3.510181,-1.6136,-1.078299  
H,-0.157516,0.00078,1.510495  
H,0.106097,0.413024,-1.533115  
H,-2.165867,-0.711482,2.396824  
H,-1.93465,0.042954,-1.873688  
H,-4.28893,-0.621375,-2.09671  
H,-4.534961,-1.381036,2.133065  
H,1.72125,-1.156896,-2.181067  
H,2.182048,0.84244,1.607318  
H,4.327668,-0.321042,1.948632  
H,3.886552,-2.286885,-1.838949  
C,-5.989436,-1.479542,-0.169853  
H,-6.54384,-1.401665,0.762327  
H,-6.489011,-0.884924,-0.932595  
H,-6.01813,-2.522643,-0.49377  
C,5.601259,-2.051419,0.272205  
H,6.397535,-1.403863,-0.096884  
H,5.796191,-2.250767,1.324498  
H,5.658138,-2.992808,-0.271023  
Br,0.348826,2.445232,-0.062257

#### Stilbene 9

C,0.528345,0.768335,0.51398  
C,1.408215,0.132433,-0.480472  
C,-0.908952,0.383531,0.359786  
C,-1.502983,-0.374176,1.376628

H,1.674294,-0.955638,2.178734  
C,5.414784,-2.19142,-0.180319  
N,6.396351,-2.83599,-0.3199  
O,-5.599415,-1.193763,0.502261  
C,-6.492709,-1.689935,-0.528556  
H,-7.420702,-1.887667,-0.010012  
H,-6.635923,-0.928275,-1.28939  
H,-6.091518,-2.604909,-0.954459  
Br,0.707313,2.72373,-0.03262

#### Stilbene 8

C,-0.3467935938,0.4526977987,0.6617293716  
C,-0.5866631892,-0.9003041864,1.1841789645  
C,-1.7522191454,-1.5850102992,0.5491611132  
C,0.8772961068,1.053214323,0.3767383474  
C,0.85526497,2.3850785313,-0.1355126555  
C,2.1288650745,0.3936643109,0.5617766403  
C,3.2956301268,1.0557132983,0.2456667843  
C,2.0365566806,3.0235712678,-0.4547885847  
C,3.2739486597,2.3746875233,-0.2670391879  
C,-1.5041673093,-2.7274066715,-0.2221266644  
C,-3.0522750422,-1.0703250202,0.6527622146  
C,-4.0971662245,-1.7023396599,-0.0166025842  
C,-3.8505169587,-2.8390860008,-0.7928260858  
C,-2.5564507673,-3.3532253648,-0.8905020883  
H,-1.2497896545,1.0311623243,0.480035545  
H,0.2960912746,-1.5325952357,1.2151236481  
H,-0.0972308299,2.883614172,-0.2709872856  
H,2.1693770973,-0.6093379409,0.964414245  
H,4.2494472641,0.5650185575,0.3924452481  
H,2.0193839943,4.03354989,-0.8432791215  
H,-0.5000466471,-3.1295664852,-0.2935160973  
H,-3.2521500852,-0.2178520517,1.2913938364  
H,-5.103571273,-1.315548274,0.0732903088  
H,-4.6668188192,-3.3291392597,-1.3065670864  
H,-2.3666343348,-4.2400950248,-1.480241089  
C,4.5539834711,3.0524181851,-0.6372882906  
H,4.4414804472,4.1337896187,-0.6552668513  
H,5.3507674412,2.7880480155,0.0556712421  
H,4.8630305326,2.7282718428,-1.633933793  
Br,-0.9175862482,-0.3436316051,3.0754751981

#### Stilbene 10

C,0.16297,0.664503,-0.522966  
C,1.077817,0.108596,0.48929  
C,2.370567,-0.36739,0.297652  
C,-1.255872,0.223701,-0.342882

C,-2.817267,-0.816207,1.239287  
C,-3.533227,-0.495056,0.08501  
C,-2.948952,0.268845,-0.930559  
C,-1.636884,0.709253,-0.7935  
C,2.678471,-0.39796,-0.278331  
C,3.32874,-0.399589,0.992774  
C,4.584548,-0.954408,1.109082  
C,5.237527,-1.530692,-0.007318  
C,4.592596,-1.533744,-1.261538  
C,3.339646,-0.974235,-1.405673  
H,0.869639,0.669245,1.540547  
H,0.992595,0.084106,-1.484579  
H,-0.946499,-0.613609,2.275285  
H,-3.286961,-1.391238,2.025129  
H,-3.52466,0.530504,-1.807786  
H,-1.1977,1.341491,-1.555904  
H,2.844144,-0.967648,-2.369315  
H,5.093206,-1.970772,-2.115718  
H,5.088117,-0.950608,2.067441  
H,2.854097,0.04716,1.855874  
C,6.582666,-2.159966,0.15895  
H,6.463496,-3.175303,0.54516  
H,7.114337,-2.220605,-0.787574  
H,7.187783,-1.605909,0.874356  
C,-4.927945,-1.023941,-0.100905  
F,-5.537562,-1.237052,1.082982  
F,-4.905406,-2.198982,-0.767464  
F,-5.685956,-0.165808,-0.814121  
Br,0.902327,2.657864,-0.001105

#### Stilbene 11

C,-0.219773,0.586380,-0.505453  
C,0.725847,0.061666,0.491176  
C,2.038041,-0.346248,0.285951  
C,-1.608963,0.066590,-0.326068  
C,-2.125526,-0.790707,-1.303984  
C,-2.361521,0.362084,0.817848  
C,-3.619838,-0.199713,0.985582  
C,-3.385096,-1.356957,-1.142910  
C,-4.131352,-1.066108,0.006889  
C,2.761983,-0.831065,1.415871  
C,2.673242,-0.310777,-0.990584  
C,3.974527,-0.742396,-1.109710  
C,4.690262,-1.228334,0.009409  
C,4.060720,-1.268037,1.269169  
H,0.119319,0.498166,-1.532645  
H,0.326052,-0.005321,1.499597  
H,-1.550628,-1.011735,-2.194550  
H,-1.985078,1.063639,1.551107  
H,-4.212918,0.031289,1.859262  
H,-3.793731,-2.014848,-1.896880

C,-1.820503,-0.60845,-1.318734  
C,-1.994273,0.571373,0.798026  
C,-3.286512,0.08647,0.969266  
C,-3.114015,-1.100823,-1.161239  
C,-3.817124,-0.74664,-0.014014  
C,3.065654,-0.866979,1.441622  
C,3.012862,-0.387314,-0.977751  
C,4.293219,-0.885226,-1.082151  
C,4.979737,-1.385764,0.050863  
C,4.343084,-1.370976,1.309488  
H,0.501512,0.536403,-1.547285  
H,0.672028,0.081026,1.498241  
H,-1.256511,-0.868796,-2.206775  
H,-1.57914,1.254912,1.528903  
H,-3.882858,0.344977,1.831862  
H,-3.576577,-1.738434,-1.900125  
H,2.57624,-0.846527,2.408193  
H,2.512641,0.002629,-1.853861  
H,4.790566,-0.89446,-2.043715  
H,4.869265,-1.749876,2.175967  
N,-5.186901,-1.264318,0.163216  
O,-5.638175,-1.988491,-0.737238  
O,-5.783048,-0.939943,1.201738  
C,6.352403,-1.955552,-0.101403  
H,6.925959,-1.401259,-0.842194  
H,6.891811,-1.954757,0.842662  
H,6.279547,-2.989492,-0.44802  
Br,0.449529,2.589262,-0.09465

#### Stilbene 12

C,-0.4902521128,0.14558199,-0.5112250711  
C,0.545968117,-0.1664295369,0.474631103  
C,1.8992662507,-0.4590899764,0.2347345149  
C,-1.8658228413,-0.3293449659,-0.2187515881  
C,-2.4939434718,-1.1362862868,-1.1759336322  
C,-2.5059013547,-0.0399108976,0.9952226606  
C,-3.7670647166,-0.5715948291,1.2492517398  
C,-3.75605466,-1.6677121136,-0.9105892968  
C,-4.3903029381,-1.3897698866,0.3011220658  
C,2.696456882,-0.8011085215,1.3618163374  
C,2.464166351,-0.476077753,-1.0700103988  
C,3.7931761039,-0.8270808335,-1.2258972163  
C,4.5677133509,-1.1754177054,-0.1054565373  
C,4.022296496,-1.1632936968,1.1848190296  
H,-0.1978597297,0.0126203373,-1.5484507074  
H,0.1927526693,-0.2184090918,1.5017749013  
H,-2.002374335,-1.3481746096,-2.1184040218  
H,-2.0482052189,0.6336947369,1.7105907896  
H,-4.2691486848,-0.3408081382,2.1793099679  
H,-4.2429361416,-2.2898765039,-1.6494908941

H,2.277648,-0.852638,2.383852  
H,2.150042,0.069299,-1.856316  
H,4.466199,-0.709453,-2.072556  
H,4.608883,-1.636015,2.125425  
C,-5.429099,-1.647688,0.180198  
N,-6.497775,-2.132492,0.326042  
C,6.087167,-1.725523,-0.159298  
H,6.629261,-1.128275,-0.888682  
H,6.629601,-1.718883,0.781700  
H,6.064259,-2.752830,-0.528147  
Br,-0.029377,2.506173,-0.030228

#### Stilbene 13

C,4.8607148409,-1.9367872965,-1.2222733248  
C,3.6332220708,-1.3118705053,-1.3635506159  
C,3.0061987873,-0.7158715385,-0.2308918023  
C,3.6455550415,-0.7528834231,1.0415429913  
C,4.8770082227,-1.3699686972,1.1595524953  
C,5.4790433972,-1.9644496106,0.0355406507  
C,1.7423614173,-0.147830468,-0.4278369282  
C,0.8779808609,0.4891032331,0.572727587  
Br,1.4773256255,2.3254713614,0.0257112724  
C,-0.5844150507,0.2623048074,0.393360765  
C,-1.2785718154,-0.3890648992,1.4203903994  
C,-2.6304090378,-0.6894212055,1.2647862993  
C,-3.2831614549,-0.328910216,0.0851642975  
C,-2.5982834452,0.3335545085,-0.9390905919  
C,-1.2488895842,0.6316363736,-0.7851131427  
C,-4.7246305886,-0.7058116336,-0.1181037929  
F,-4.8185915093,-1.8910289828,-0.7587891385  
F,-5.3748364264,-0.8219348559,1.0572017591  
F,-5.3687997157,0.214117516,-0.8651804824  
H,1.2011462048,0.3637665843,1.6019542729  
H,1.3207801643,-0.1869989247,-1.429819909  
H,-0.7696976193,-0.6596729114,2.3381220455  
H,-0.7298316988,1.1890095481,-1.5559138627  
H,-3.1246586755,0.6295504873,-1.8361543491  
H,-3.1761303255,-1.1840719176,2.0561341096  
H,3.1375225176,-1.2727247128,-2.3261380777  
H,3.1899417799,-0.2840171094,1.9031487472  
H,5.379165524,-1.4020337592,2.1166181265  
H,6.4414498624,-2.4487175357,0.144716726  
H,5.34179663,-2.3974002167,-2.0738535265

#### Stilbene 15

C,-0.4444533489,-0.3454565551,1.0876910221  
C,0.6034960647,-1.2133740813,0.5419429312  
C,0.4979022589,-2.5609552854,0.1858437779  
C,-0.4016784421,1.072016401,0.6345457897  
C,-1.4971805278,1.566100426,-0.082294989  
C,0.7195901279,1.8826557691,0.854794029

H,-5.3723352958,-1.7964809104,0.5025183186  
H,2.2551344689,-0.7795560141,2.3510707886  
H,1.8748876899,-0.1937728373,-1.9320361558  
H,4.2388010856,-0.8393879982,-2.2110504167  
H,5.6051496963,-1.4530171368,-0.243263272  
H,4.6335530029,-1.4315256143,2.0352891127  
Br,-0.2053136633,2.1088117935,-0.1055451213

#### Stilbene 14

C,0.52185,0.436509,-0.553032  
C,1.412792,-0.150984,0.456599  
C,2.690432,-0.685129,0.263374  
C,-0.931184,0.159512,-0.355336  
C,-1.60474,-0.56566,-1.347417  
C,-1.605213,0.553739,0.810262  
C,-2.941764,0.21569,0.991968  
C,-2.943695,-0.910898,-1.178493  
C,-3.581658,-0.516596,-0.006664  
C,3.346815,-1.227852,1.407213  
C,3.320128,-0.737659,-1.014138  
C,4.57016,-1.316959,-1.125931  
C,5.200851,-1.858637,0.009326  
C,4.592934,-1.815518,1.272106  
H,0.839837,0.288793,-1.580985  
H,1.003059,-0.171584,1.46413  
H,-1.089436,-0.859696,-2.254255  
H,-1.103453,1.161083,1.554179  
H,-3.49034,0.512764,1.87365  
H,-3.489421,-1.465361,-1.92767  
H,2.85823,-1.177316,2.372914  
H,2.84191,-0.309279,-1.884509  
H,5.06537,-1.360083,-2.086174  
H,6.177914,-2.313847,-0.095117  
H,5.096655,-2.235377,2.131625  
N,-4.999709,-0.877506,0.181947  
O,-5.546831,-1.512482,-0.732377  
O,-5.535744,-0.521581,1.242573  
Br,1.047486,2.310503,-0.0772

#### Stilbene 16

C,-0.847696,0.570537,-0.585815  
C,0.145621,0.380677,0.469553  
C,1.530114,0.121297,0.305307  
C,-2.239801,0.124257,-0.364858  
C,-2.84011,-0.650535,-1.368069  
C,-2.937697,0.414049,0.818961

C,0.7502576725,3.1753926631,0.3506221064  
C,-1.4724114668,2.8599002694,-0.5910169336  
C,-0.3448329359,3.6642215841,-0.3792530484  
C,1.6556221063,-3.1778686275,-0.3670221474  
C,-0.7111285837,-3.2997502404,0.3160145182  
C,-0.7436889963,-4.6165524634,-0.0984940659  
C,0.4032236879,-5.2093670855,-0.653709964  
C,1.5993988367,-4.4939275216,-0.7886687229  
H,-1.4443502996,-0.7659924198,1.0642849094  
H,1.5603532078,-0.7223608092,0.3854959405  
H,-2.3699908832,0.9457239082,-0.2423487707  
H,1.5451737413,1.5232616229,1.4557919548  
H,1.6058844139,3.8127590989,0.5238871922  
H,-2.3156282207,3.2504777279,-1.1429457798  
H,2.5701033577,-2.6055742909,-0.4558692942  
H,-1.5891968697,-2.8493448497,0.7562577172  
H,-1.6516010703,-5.193878802,-0.0013798445  
H,2.4703993956,-4.9690942093,-1.2155711859  
C,-0.3125968176,4.9982678561,-0.9003592903  
N,-0.2833716025,6.0978258029,-1.3345809767  
H,0.3609522576,-6.240457421,-0.9786671824  
Br,0.2269993929,-0.6060071053,2.9543953073

#### Stilbene 17

C,-0.873114,0.198255,0.460871  
C,0.11165,0.407716,-0.595803  
C,1.528902,0.08171,-0.37062  
C,-2.240241,-0.15899,0.290573  
C,-2.947704,-0.557373,1.448038  
C,-2.877169,-0.184027,-0.972014  
C,-4.187582,-0.61086,-1.069026  
C,-4.255757,-1.000185,1.347396  
C,-4.877905,-1.027572,0.087904  
C,2.199951,-0.618681,-1.382264  
C,2.191134,0.408173,0.823025  
C,3.506388,0.011679,1.017387  
C,4.140522,-0.703744,0.003379  
C,3.516872,-1.026118,-1.195822  
H,-0.464263,0.134378,1.464875  
H,-0.238724,0.246601,-1.60953  
H,-2.458907,-0.526857,2.413475  
H,-2.365443,0.157243,-1.861445  
H,-4.691506,-0.631675,-2.024999  
H,-4.80249,-1.318394,2.223646  
H,1.694904,-0.855175,-2.310136  
H,1.701481,1.005841,1.581585  
H,4.046955,0.252537,1.919759

C,-4.218316,-0.089304,1.012103  
C,-4.121656,-1.164101,-1.184066  
C,-4.781514,-0.87405,0.005836  
C,2.264975,-0.199035,1.474003  
C,2.168267,0.112696,-0.960934  
C,3.508461,-0.220442,-1.043746  
C,4.218481,-0.556296,0.12179  
C,3.604343,-0.548435,1.378454  
H,-0.489044,0.434145,-1.60138  
H,-0.26105,0.308039,1.475154  
H,-2.308316,-0.860571,-2.288508  
H,-2.505414,1.064449,1.570379  
H,-4.78508,0.121067,1.907169  
H,-4.608954,-1.766308,-1.936735  
H,1.772548,-0.179686,2.438973  
H,1.631444,0.392069,-1.857984  
H,4.016237,-0.220726,-1.998683  
H,4.174823,-0.800668,2.261128  
N,-6.141875,-1.409776,0.208795  
O,-6.621435,-2.090581,-0.710154  
O,-6.69794,-1.139005,1.284031  
C,5.661289,-0.982835,-0.01227  
F,6.291397,-0.230211,-0.933427  
F,6.31606,-0.866388,1.155934  
F,5.721165,-2.268219,-0.407756  
Br,-0.535292,2.539023,-0.135781

#### Stilbene 18

C,0.5983553681,-0.4926952528,0.8348231587  
C,-0.4761585049,0.4921550906,0.90468535  
C,-0.3211301826,1.8929569489,0.5609128656  
C,0.3999853906,-1.8937172582,0.5150655821  
C,1.4767423771,-2.5700110992,-0.0867278593  
C,-0.818257344,-2.562488008,0.7468662118  
C,-0.9607208221,-3.8824064407,0.3459224009  
C,1.3234839893,-3.8896124031,-0.5012880545  
C,0.1075493724,-4.5392066525,-0.2817011995  
C,-1.4670508901,2.5688987741,0.1038543672  
C,0.9168856437,2.5618283438,0.6318273262  
C,1.0059251273,3.8814749841,0.2148845884  
C,-0.1349401452,4.5379057885,-0.2688757384  
C,-1.3690795315,3.8882188336,-0.3279930386  
H,1.5905386256,-0.0928596332,0.6471287611  
H,-1.4843102258,0.092238814,0.8479193578  
H,2.4187403298,-2.05857574,-0.245416115  
H,-1.6311840937,-2.0748899423,1.2713001438  
H,-1.8847340963,-4.4134706603,0.5295185137  
H,2.1416494704,-4.4159087271,-0.9723641362  
H,-2.4216653611,2.0573992287,0.0693919342  
H,1.7911464494,2.0745423985,1.0463791349  
H,1.9459469728,4.4126206865,0.2763698757

H,4.058185,-1.571086,-1.953783  
C,-6.231164,-1.47494,-0.024929  
N,-7.351509,-1.845472,-0.119809  
N,5.538069,-1.126119,0.208903  
O,6.061476,-0.82535,1.291362  
O,6.077824,-1.750054,-0.715601  
Br,-0.37512,2.34402,-0.122336

#### Stilbene 19

C,-1.226812,0.30904,-0.520317  
C,-0.23311,0.388513,0.544006  
C,1.182287,0.154244,0.355711  
C,-2.598713,-0.115877,-0.31445  
C,-3.244158,-0.743586,-1.393481  
C,-3.265281,0.039956,0.914931  
C,-4.548923,-0.455199,1.068937  
C,-4.526168,-1.253139,-1.237379  
C,-5.179797,-1.110131,-0.005104  
C,1.906614,-0.304291,1.469317  
C,1.823012,0.324921,-0.886173  
C,3.164926,0.00646,-1.01109  
C,3.871357,-0.480063,0.09671  
C,3.249421,-0.637635,1.334372  
H,-0.831549,0.183408,-1.522965  
H,-0.613674,0.259041,1.551963  
H,-2.73641,-0.847488,-2.343933  
H,-2.805447,0.580216,1.732466  
H,-5.075672,-0.336719,2.005258  
H,-5.026052,-1.749061,-2.057225  
H,1.415338,-0.415426,2.427576  
H,1.294132,0.742729,-1.733035  
H,3.674573,0.145553,-1.95372  
H,3.813207,-0.999496,2.181243  
C,-6.50517,-1.624105,0.162108  
N,-7.600227,-2.049472,0.302262  
C,5.311442,-0.878824,-0.085074  
F,5.950253,-0.003276,-0.883672  
F,5.960436,-0.931271,1.090981  
F,5.385976,-2.093745,-0.660663  
Br,-0.876069,2.351899,-0.036612

#### Stilbene 21

C,0.5695460879,0.4553183574,0.7418319868  
C,-0.5696102257,-0.4553537174,0.7418319868  
C,-0.4833037411,-1.8631044043,0.41193467  
C,0.4832396033,1.8630690443,0.41193467  
C,1.6331855895,2.4664197029,-0.1270032572  
C,-0.6991097739,2.6102807883,0.5711819301

H,-2.2415953397,4.4142385762,-0.6889842394  
C,-0.0931801113,-5.9506492533,-0.7699782862  
F,1.081184584,-6.5937340945,-0.9098022144  
F,-0.8598145561,-6.6501408447,0.0900499039  
F,-0.7131747052,-5.9455337296,-1.9669454949  
C,0.000505487,5.9490161896,-0.7800497529  
F,0.8724720437,6.6490436242,-0.0275198288  
F,0.4595251036,5.9430816754,-2.0474943279  
F,-1.1820972121,6.5920592553,-0.7663443268  
Br,0.19266828,0.0003986951,2.8839703715

#### Stilbene 20

C,0.097976137,0.7234757134,0.7974354269  
C,-0.0980047358,-0.7235150936,0.7974335581  
C,-1.3504265811,-1.3768929711,0.4649444376  
C,1.3503978556,1.3768544669,0.4649475506  
C,1.2722186267,2.6780440009,-0.0681748894  
C,2.602587512,0.7474870948,0.618165884  
C,3.7580876351,1.3983589952,0.2122840762  
C,2.4246146735,3.3326830016,-0.4899259554  
C,3.6436283064,2.6769069416,-0.3396853746  
C,-1.2722475553,-2.6780811006,-0.0681814603  
C,-2.6026161791,-0.7475260027,0.6181649062  
C,-3.7581164569,-1.3983968338,0.2122818238  
C,-3.6436573384,-2.676943326,-0.339691039  
C,-2.4246437628,-3.3327189901,-0.4899338119  
H,-0.8017281056,1.3191900729,0.6736726331  
H,0.8016994596,-1.319229127,0.6736688521  
H,0.3103718616,3.1666334752,-0.1694281485  
H,2.683695362,-0.22629527,1.0859873656  
H,4.734556756,0.9490407147,0.3193956814  
H,2.3964564594,4.3257267528,-0.914093293  
H,-0.3104008288,-3.1666703081,-0.169436373  
H,-2.6837238509,0.2262551296,1.0859889842  
H,-4.7345855369,-0.9490788355,0.3193949848  
H,-2.3964857103,-4.3257616238,-0.9141037765  
N,4.8749896387,3.3663446198,-0.7752820656  
O,4.7419782666,4.5045652941,-1.2491961244  
O,5.9419931757,2.7500216144,-0.6323669568  
N,-4.8750188367,-3.3663798566,-0.7752890773  
O,-5.9420223193,-2.7500572277,-0.6323719382  
O,-4.7420076452,-4.5045992823,-1.2492061855  
Br,-0.0000139157,-0.0000223439,2.811985329

#### Stilbazole 22

C,0.121631,0.074962,0.612012  
C,1.127206,0.324894,-0.44283  
C,2.336749,-0.544514,-0.253969  
C,-1.238193,-0.101578,0.460615  
C,-2.028915,-0.338681,1.638506  
C,-1.897009,-0.054983,-0.813199

C,-0.7359517654,3.9334058349,0.1663222459  
C,1.5942519541,3.7889360224,-0.5467924395  
C,0.4088258637,4.5239938387,-0.4011285102  
C,-1.6332497273,-2.4664550629,-0.1270032572  
C,0.6990456361,-2.6103161483,0.5711819301  
C,0.7358876276,-3.9334411949,0.1663222459  
C,-0.4088900015,-4.5240291987,-0.4011285102  
C,-1.5943160919,-3.7889713824,-0.5467924395  
H,1.5419420924,-0.0090600295,0.6143765657  
H,-1.5420062302,0.0090246695,0.6143765657  
H,2.5467359306,1.8952791179,-0.2328950162  
H,-1.5709269699,2.1784353183,1.0455462521  
H,-1.634582723,4.5214024483,0.2885215026  
H,2.4688881989,4.2578054777,-0.9747526891  
H,-2.5468000684,-1.8953144779,-0.2328950163  
H,1.5708628321,-2.1784706783,1.0455462521  
H,1.6345185852,-4.5214378083,0.2885215026  
H,-2.4689523366,-4.2578408377,-0.9747526891  
C,0.3621547847,5.8909763101,-0.8223913714  
N,0.3216330422,7.0208339099,-1.1712220811  
C,-0.3622189224,-5.8910116701,-0.8223913714  
N,-0.3216971799,-7.0208692699,-1.1712220811  
Br,-0.0000320689,-0.00001768,2.7523254214

#### Stilbazole 23

C,-0.225551,-0.055985,0.514531  
C,0.815288,0.254111,-0.480741  
C,2.097837,-0.479919,-0.237583  
C,-1.586216,-0.238781,0.293029  
C,-2.404001,-0.540546,1.425053  
C,-2.183653,-0.152233,-1.001269  
C,-3.539029,-0.35918,-1.135318  
C,-3.757153,-0.755153,1.263389  
C,-4.348304,-0.664861,-0.014072  
C,2.488853,-1.470645,-1.14192  
C,2.883265,-0.25826,0.898197  
C,4.021146,-1.043356,1.077524  
N,4.408724,-2.005214,0.220436  
C,3.647822,-2.2001,-0.868624  
H,0.139237,-0.143934,1.535678  
H,0.487142,0.170138,-1.513015  
H,-1.947337,-0.601316,2.405837  
H,-1.586828,0.094002,-1.86903  
H,-4.000985,-0.285555,-2.111638  
H,-4.37639,-0.98482,2.120707  
H,1.917888,-1.671414,-2.040322  
H,2.645497,0.52842,1.603209  
H,4.657097,-0.894143,1.94162  
H,3.982843,-2.970767,-1.552259  
C,-5.808468,-0.923271,-0.197411

C,-3.253566,-0.225513,-0.908373  
C,-3.380366,-0.518477,1.548416  
C,-4.012754,-0.464228,0.27454  
C,2.546646,-1.613837,-1.128583  
C,3.224089,-0.367949,0.812378  
C,4.277399,-1.270222,0.953341  
N,4.491366,-2.306758,0.12276  
C,3.634017,-2.45895,-0.899675  
H,0.529404,0.033809,1.619371  
H,0.736023,0.239859,-1.453132  
H,-1.536341,-0.373704,2.602552  
H,-1.327614,0.133876,-1.713121  
H,-3.736648,-0.180579,-1.872728  
H,-3.99946,-0.699902,2.416018  
H,1.891953,-1.786268,-1.974368  
H,3.126295,0.469931,1.490949  
H,4.987633,-1.158055,1.763598  
H,3.829143,-3.291676,-1.564712  
O,-5.314772,-0.645481,0.295464  
C,-6.077792,-0.608412,-0.940976  
H,-7.100087,-0.783662,-0.631639  
H,-5.981747,0.370296,-1.404353  
H,-5.739847,-1.398475,-1.60687  
Br,1.517859,2.249732,-0.181937

#### Stilbene 24

C,-0.1040413823,-0.5628104719,1.8111952482  
C,0.4480774988,0.6514616838,1.1804297724  
C,-0.2420356325,1.6742894059,0.5636744957  
C,0.4165713245,-1.7156538427,1.0089156453  
C,-0.4438860804,-2.3544045286,0.1031298538  
C,1.7645650484,-2.1060995212,1.0610224431  
C,2.2321264552,-3.1241515899,0.243858626  
C,0.0226800661,-3.371794553,-0.7175043929  
C,1.3694214553,-3.7785631978,-0.6577777415  
C,0.5118592488,2.7310940341,-0.0527333364  
C,-1.6755681197,1.7494555884,0.5195404224  
C,-2.3011711394,2.8024077774,-0.0841645476  
C,-1.5330845357,3.8478499096,-0.6878997138  
C,-0.1068845381,3.7867870165,-0.6582725187  
H,-1.1893975903,-0.5767599055,1.8653531372  
H,1.5340731125,0.6981339506,1.1779547358  
H,-1.4884983114,-2.0672088341,0.0515573558  
H,2.4308309822,-1.6489061878,1.7828017375  
H,3.2690862935,-3.4318679708,0.3069811743  
H,-0.6549735195,-3.8677897747,-1.402083287  
H,1.5937227393,2.6814527971,-0.0270771813  
H,-2.274183076,0.9725145712,0.9747488566  
H,-3.3820607208,2.8600027564,-0.110219976  
H,0.4693890575,4.5802456416,-1.1167553596  
N,1.8526381117,-4.7427450115,-1.5181240412



H,-6.358797,-0.77775,0.728969  
H,-6.226247,-0.277095,-0.967397  
H,-5.956377,-1.957084,-0.519482  
Br,0.947176,2.203911,-0.104989

H,1.1745612956,-5.37985541,-1.9057153514  
H,2.7074377699,-5.200990682,-1.2436958109  
N,-2.1495738975,4.8732329159,-1.2729216463  
H,-3.1558022513,4.9361650337,-1.3002681461  
H,-1.6294740346,5.6237623674,-1.7013884233  
Br,0.5192899393,-0.5458021171,3.6848232122

**Table S3:** Cartesian coordinates for the optimised geometries of the cationic intermediates of the electrophilic bromination of substituted stilbenes and stilbazoles calculated at the M06-2X/6-31G(d,p) level of theory.

#### Stilbene 1

C,1.3990148403,-0.5344617215,1.5918862449  
C,0.2819184326,0.4284151222,1.4934237892  
C,0.2549889494,1.6296519625,0.8157117265  
C,0.9289564518,-1.7646458199,0.8560794399  
C,1.288721078,-1.9068609529,-0.4935808852  
C,0.0816920413,-2.7092826923,1.4380552659  
C,-0.385277294,-3.7925197205,0.7054888051  
C,0.8300846053,-2.9770224993,-1.2326956366  
C,-0.0126262526,-3.9318671875,-0.6381943009  
C,-0.9706829468,2.3723066052,0.8004470336  
C,1.3942621918,2.1877204154,0.1401337304  
C,1.3050990478,3.3890341419,-0.4906770267  
C,0.0725020112,4.1058749677,-0.4846449844  
C,-1.0721091333,3.5816887751,0.1711969181  
H,2.3366930944,-0.162688154,1.1840439377  
H,-0.6318474851,0.0977724876,1.9868666067  
H,1.9448299159,-1.1772259057,-0.9617976801  
H,-0.1829765167,-2.619899595,2.487459537  
H,-1.0213532912,-4.5247581945,1.1862245597  
H,1.1107232345,-3.1150708743,-2.2704354794  
H,-1.8359983011,1.9560306734,1.3080819686  
H,2.3378875364,1.6538171735,0.1347939576  
H,2.1462871369,3.8389746943,-1.0047167325  
H,-2.006943454,4.1267777173,0.1754835878  
O,-0.4008859609,-4.9375362094,-1.434076281  
C,-1.233441666,-5.9497568581,-0.8882596006  
H,-1.4127145115,-6.6556021486,-1.6965131669  
H,-0.7345699812,-6.4607352076,-0.0584403061  
H,-2.1865329013,-5.5318898967,-0.5477591434  
O,0.0944794959,5.2511380684,-1.1159725114  
C,-1.0805219553,6.0731302135,-1.1778846246  
H,-0.7862121769,6.9505493884,-1.747387561  
H,-1.8839337564,5.5422103613,-1.6935063169  
H,-1.3887814086,6.3642467814,-0.1712121832  
Br,1.7073048727,-0.7991642551,3.5017548845

#### Stilbene 3

C,-0.6595299348,-0.4951248954,0.557585698

#### Stilbene 2

C,-0.7476203566,-0.0266272813,0.7801560065  
C,0.3253384238,-0.8280747034,1.4109064848  
C,0.4095219694,-2.2153232062,0.8433253922  
C,-0.7014640228,1.2931997078,0.3898610974  
C,-1.8636293417,1.8727532544,-0.2279398255  
C,0.448358643,2.1274823252,0.5876430586  
C,0.4477962231,3.435665039,0.1986772618  
C,-1.8730608006,3.1727314712,-0.6278161101  
C,-0.7164357013,3.9753694946,-0.4202127557  
C,1.5141336795,-2.5510649405,0.0615209764  
C,-0.6196969843,-3.1457183222,1.0184603749  
C,-0.5370251261,-4.389866521,0.413354663  
C,0.5666597553,-4.7401975904,-0.3760226264  
C,1.5873301733,-3.8023692605,-0.5413834747  
H,-1.6755388799,-0.5749482185,0.6162948748  
H,1.2970590431,-0.3385472865,1.4084035731  
H,-2.7410742553,1.2504071378,-0.3760395592  
H,1.331652835,1.723419647,1.0702129413  
H,1.3200590897,4.0550682073,0.3623476324  
H,-2.7331516894,3.6329979778,-1.0993171053  
H,2.3217046072,-1.837459373,-0.0788071728  
H,-1.4652777182,-2.9061093184,1.6582205717  
H,-1.3352115907,-5.1112850845,0.5616297158  
H,2.4535399913,-4.0556906869,-1.1449229884  
O,-0.8136588768,5.2118988439,-0.8303340145  
C,0.2819279365,6.1275031377,-0.6757515982  
H,-0.0694099174,7.0658992978,-1.0961055441  
H,0.5182921681,6.2550279309,0.3829160364  
H,1.1518624686,5.7693248938,-1.2305712519  
C,0.6572862794,-6.1072804502,-0.9976048771  
H,-0.3136794205,-6.4322355491,-1.3783089277  
H,1.3746551997,-6.1239924035,-1.8198529576  
H,0.9820794145,-6.8425524609,-0.2547726585  
Br,-0.2892754722,-0.7860384085,3.2912180287

#### Stilbene 4

C,-1.0638800399,0.1857928824,0.5816555386

C,0.4303716556,-1.3189638702,1.1308671188  
C,0.5028897764,-2.6929051495,0.5261587209  
C,-0.6390864644,0.8521765026,0.2773106792  
C,-1.8045270168,1.4558887404,-0.3111866714  
C,0.4878408142,1.6919750424,0.5664200022  
C,0.4642687585,3.0269964536,0.2861039729  
C,-1.8352982724,2.7830651886,-0.6062252464  
C,-0.7004389746,3.5902826649,-0.3119534915  
C,1.6006057596,-3.0096328036,-0.2741294927  
C,-0.5291739019,-3.6197392947,0.6979167147  
C,-0.461106065,-4.8534971054,0.0647672128  
C,0.6345394157,-5.1679518233,-0.7395173945  
C,1.6650058504,-4.2482774136,-0.9063772455  
H,-1.5753485787,-1.047532745,0.34573143  
H,1.401335539,-0.8278722256,1.1161403024  
H,-2.66532956,0.8294491058,-0.5251189453  
H,1.3680323247,1.2689420071,1.0386204625  
H,1.3175211354,3.6502423203,0.5202052599  
H,-2.6969012592,3.2622311621,-1.0556206992  
H,2.4073941467,-2.2931960672,-0.4024863684  
H,-1.3624286892,-3.3882484465,1.3563552214  
H,-1.2565815402,-5.5765771494,0.2073854054  
H,0.6870994526,-6.134924406,-1.2278349734  
H,2.5225393087,-4.4944747795,-1.5227076607  
O,-0.8179760996,4.8530324075,-0.6228111247  
C,0.2526450515,5.7775230823,-0.3722792205  
H,-0.1120240807,6.7380876891,-0.7258219667  
H,0.4633642011,5.8261104263,0.6982681111  
H,1.1419657556,5.4830411635,-0.9336788679  
Br,-0.1336835253,-1.3344627536,3.0272930566

#### Stilbene 5

C,-0.4131466117,-0.0643729415,1.2127964584  
C,0.710181995,0.7348191592,0.6614426771  
C,0.7060099176,2.069023032,0.336284834  
C,-0.4381534811,-1.4767449022,0.6899126256  
C,-1.4658921323,-1.8431331121,-0.1799871843  
C,0.572181485,-2.3881152784,1.0124199372  
C,0.5629577987,-3.6601750352,0.4591126646  
C,-1.4883950567,-3.1163004911,-0.7392845771  
C,-0.4686671077,-3.9934437838,-0.4086804402  
C,1.901362972,2.6528824061,-0.2165298479  
C,-0.4331423396,2.9206710661,0.5433531347  
C,-0.3936966056,4.2435119765,0.2179484923  
C,0.8006148055,4.7853376693,-0.3453258045  
C,1.9482805516,3.9675403803,-0.5565170467  
H,-1.3830648881,0.4140755643,1.0914364659  
H,1.6353340657,0.1758395787,0.5181399513

C,-0.1958477285,0.7984223659,-0.4535214111  
C,1.2415470014,0.367905391,-0.3374065889  
C,-2.3585481256,-0.2534430736,0.4392713593  
C,-3.0179458804,-0.8477748069,1.5727148847  
C,-3.095940785,-0.128631818,-0.7868741425  
C,-4.3832416563,-0.5674029719,-0.88432863  
C,-4.2968202879,-1.2995824585,1.4841293453  
C,-5.0008213905,-1.1669345606,0.253135968  
C,1.7685835057,-0.4596026016,-1.3281868822  
C,2.0235717852,0.7306623598,0.7630006503  
C,3.3222276983,0.2565615556,0.8737808589  
C,3.8388485107,-0.5783116953,-0.1160681748  
C,3.0717950629,-0.934362719,-1.2186872364  
H,-0.5968134245,0.0916742571,1.5623863142  
H,-0.5665110671,0.6606194494,-1.4673506622  
H,-2.47110739,-0.9377764639,2.5065783744  
H,-2.6349109712,0.3443963812,-1.6473958442  
H,-4.9305864907,-0.4569777636,-1.8114876475  
H,-4.8146090959,-1.7571711363,2.3186961588  
H,1.1678607308,-0.7318832088,-2.1911272606  
H,1.6288867874,1.4142410053,1.5095802883  
H,3.944213743,0.5450366321,1.7140143636  
H,3.4945231601,-1.5679930074,-1.990176669  
O,-6.2230788969,-1.6218694919,0.2580644161  
C,-7.0472093602,-1.544672039,-0.9171804639  
H,-7.9947899177,-1.9918325578,-0.6296393708  
H,-7.1946710957,-0.5010325891,-1.2029507528  
H,-6.5934126998,-2.114443775,-1.7308051174  
C,5.2330512681,-1.1317743159,0.0396516656  
F,6.0345055635,-0.2550738043,0.6523894631  
F,5.219479854,-2.2484302092,0.777608267  
F,5.7712921574,-1.4361242552,-1.1448713675  
Br,-0.4604905244,2.7106740431,-0.0389006944

#### Stilbene 6

C,0.0419081351,0.5190631519,0.8003374795  
C,0.2034639611,-0.8749995955,1.2811292981  
C,1.3946943061,-1.5646055902,0.6711994834  
C,-1.1310252935,1.1686659972,0.5001012207  
C,-2.4320433762,0.5679659997,0.644850499  
C,-3.553372258,1.266743947,0.3327782057  
C,3.445881849,2.6083786761,-0.147940936  
C,-2.1770733189,3.2334616531,-0.2959312498  
C,-1.0573748624,2.5239458591,0.029219021  
C,1.1680081882,-2.582489036,-0.2556890978  
C,2.2380077208,-3.196200919,-0.8951754852  
C,3.5408994835,-2.7853975367,-0.603819045  
C,3.7732120832,-1.7693029796,0.3314077551  
C,2.7006383445,1.1629608703,0.9662784365  
H,0.9768967843,1.0688377644,0.689893774  
H,-0.6965332137,-1.477042305,1.1734618112

H,-2.2557778325,-1.1389435159,-0.4232980566  
H,1.346117799,-2.1147479668,1.723853888  
H,1.3244867299,-4.3944740068,0.690911444  
H,-2.2728618444,-3.4359097612,-1.4140161318  
H,2.7703042225,2.0191485886,-0.3667888861  
H,-1.3343573858,2.5157175222,0.9914773006  
H,-1.25491422,4.8760336216,0.3902395012  
H,2.8308756367,4.4310629106,-0.9810284984  
N,-0.48203996,-5.3474054224,-1.0021574577  
O,-1.3997586011,-5.6113884923,-1.7517897105  
O,0.4279991249,-6.0910189507,-0.6977839772  
O,0.9343049827,6.0336483618,-0.6942348332  
C,-0.1437330477,6.9711823371,-0.5291539654  
H,-1.0055593175,6.6581065217,-1.1221502213  
H,-0.4039961313,7.0587406967,0.5277543523  
H,0.2430974661,7.9164670327,-0.8996523395  
Br,-0.0054769897,0.0256757348,3.1406804933

### Stilbene 7

C,-0.3055024398,0.6287881348,1.1827461066  
C,0.3003907689,-0.6246383138,0.701062672  
C,-0.3482416515,-1.8134492723,0.3745506902  
C,0.3537060209,1.8844305955,0.7140456522  
C,-0.395426935,2.786141457,-0.040077749  
C,1.7062089788,2.1446778364,0.9605700995  
C,2.2934822101,3.2883571037,0.4455528785  
C,0.2051270317,3.9310845469,-0.5539290284  
C,1.5542986936,4.2006247776,-0.3212221409  
C,0.4391892483,-2.8906730483,-0.1231668434  
C,-1.7572276283,-1.9935535,0.5088889423  
C,-2.3308642296,-3.1853938496,0.1500192789  
C,-1.543362073,-4.246123498,-0.3589915759  
C,-0.1530580039,-4.0774031109,-0.4900196924  
H,-1.3890133754,0.6680624196,1.0949163152  
H,1.383261244,-0.585292137,0.5802117947  
H,-1.4482476965,2.5975613514,-0.2316596403  
H,2.2866882045,1.4725464177,1.5880807445  
H,3.3411652041,3.4903052024,0.6480306757  
H,-0.386368138,4.6275769421,-1.1399180219  
H,1.5133557869,-2.7600999009,-0.2182668477  
H,-2.3746588021,-1.1983780234,0.9129415908  
H,-3.4013786266,-3.3293772494,0.2555638185  
H,0.448456399,-4.8921906646,-0.8779373054  
C,2.2030564131,5.4512218749,-0.8483032046  
H,1.5842410329,5.9316240776,-1.60770769  
H,2.360399124,6.1695854116,-0.0379074736  
H,3.179918043,5.2318306662,-1.285943968  
C,-2.2002260991,-5.5344036401,-0.735193066  
H,-2.6246805537,-6.0065582221,0.1577838925  
H,-3.0310511413,-5.351640916,-1.4233045443  
H,-1.5013044226,-6.2307811668,-1.1976616217

H,-2.5239868235,-0.4434806039,1.0249173294  
H,-4.547759659,0.8487159337,0.4368693176  
H,-2.0993265745,4.251509029,-0.6546129826  
H,-0.0792557326,2.9851402585,-0.0731942343  
H,2.8784086265,-0.4009711069,1.7197752039  
H,4.7904693396,-1.4720222436,0.5591519834  
H,2.0714841929,-3.9914209179,-1.6126903978  
H,0.1551533672,-2.9034847625,-0.4803498949  
C,4.6540949901,-3.413966259,-1.265514366  
N,5.5483501407,-3.9144682808,-1.8011183236  
O,-4.5805537127,3.1874287072,-0.4239124761  
C,-4.6198367789,4.5404009607,-0.9095315048  
H,-5.6740269905,4.7602921711,-1.0537955196  
H,-4.1915717366,5.2161035706,-0.1662110758  
H,-4.0858574598,4.6119793979,-1.8594190583  
Br,0.4089347878,-0.5557432639,3.2169198291.

### Stilbene 8

C,-0.3229124018,0.4366778535,0.5867535845  
C,-0.5518156573,-0.9396653632,1.0638169252  
C,-1.75959566,-1.6157098513,0.4917856879  
C,0.8964417063,1.0587777153,0.3393887889  
C,0.8779269722,2.3916193352,-0.1654398045  
C,2.155277574,0.4216066148,0.5585867162  
C,3.3172893524,1.0886426455,0.2724293782  
C,2.0530711538,3.0438480713,-0.4582719673  
C,3.2894849437,2.4066260206,-0.245436582  
C,-1.5681353695,-2.7628265483,-0.278614103  
C,-3.0440662016,-1.0913106229,0.6643102766  
C,-4.1277422337,-1.7106111024,0.0569647032  
C,-3.9352615968,-2.8530982799,-0.7205428912  
C,-2.6582741451,-3.3798103896,-0.8856274536  
H,-1.2335146882,1.0082413047,0.4047820968  
H,0.3301758304,-1.5756945819,1.035921874  
H,-0.0777900603,2.8829874405,-0.3237956582  
H,2.1968444749,-0.5809950329,0.9706115146  
H,4.2769582415,0.6116094457,0.4436129961  
H,2.0351390023,4.0550242522,-0.8498114541  
H,-0.5714585472,-3.1762788531,-0.4052240394  
H,-3.1987565424,-0.2264674937,1.3046646132  
H,-5.1257095637,-1.3111232256,0.1992242857  
H,-4.7853540488,-3.3371904448,-1.1887279684  
H,-2.5084561219,-4.2737143084,-1.4806924144  
C,4.5751582397,3.0995390341,-0.5588619776  
H,4.4187341827,4.1292821975,-0.8787045525  
H,5.2321581506,3.0930936726,0.3163903379  
H,5.1013459554,2.5608786517,-1.3546751041  
Br,-0.776119923,-0.3949215782,2.9645674334

Br,0.0752766914,0.1979933971,3.0956305035

### Stilbene 9

C,0.5173091575,-1.6647922708,0.6751524411  
C,-0.4197114947,-0.7021829453,1.2893317348  
C,-0.2722441814,0.7071169515,0.7933257471  
C,0.2761392849,-2.9924254757,0.3502164844  
C,1.3239331131,-3.7293419805,-0.2794121989  
C,-0.9675001461,-3.6471224799,0.6111814917  
C,-1.1396805161,-4.9557006195,0.2464501354  
C,1.130975543,-5.0387109694,-0.6501000604  
C,-0.0993326947,-5.6742444396,-0.3936945913  
C,-1.3283545259,1.2657124337,0.0748654129  
C,0.9086276557,1.4309352872,0.9868598728  
C,1.0322658201,2.7031626536,0.4502080389  
C,-0.0237355852,3.2510378342,-0.2778445144  
C,-1.2040470684,2.5428284548,-0.4640830146  
H,1.5062727941,-1.2579990329,0.4609988916  
H,-1.4572378346,-1.0294554663,1.2881366012  
H,2.2732408524,-3.2374530342,-0.4713826095  
H,-1.7689704358,-3.1180361746,1.1156953251  
H,-2.0796957053,-5.4595791307,0.4470190037  
H,1.9251512571,-5.5928089371,-1.1383472479  
H,-2.2514862412,0.7107874186,-0.0643981601  
H,1.7115083799,1.0160575665,1.5901431715  
H,1.9357518867,3.2822406794,0.6078302974  
H,-2.0225308354,2.9906188195,-1.0159598693  
C,-0.3164565627,-7.1028732389,-0.7684362526  
H,0.4909813559,-7.4917254457,-1.3881928635  
H,-0.3799582507,-7.7117840745,0.1411535541  
H,-1.2669375409,-7.2217274151,-1.2964266695  
C,0.1472073329,4.6167317592,-0.8956903735  
F,0.8209331002,5.4312613516,-0.0779537809  
F,0.8379489865,4.5336990399,-2.0386814819  
F,-1.0323417264,5.1789699213,-1.171451812  
Br,0.235991924,-0.9526681289,3.1428725383

### Stilbene 11

C,0.5153641731,0.1755407043,1.158649712  
C,-0.5642326503,-0.705499095,0.6660508139  
C,-0.4812044282,-2.0565647899,0.3643897326  
C,0.4551773213,1.5795115162,0.6280231665  
C,1.4768368379,2.0074723051,-0.2203341561  
C,-0.6191448593,2.4259003968,0.9179341833  
C,-0.677190788,3.6898788093,0.3526672502  
C,1.4255241168,3.2737253299,-0.7899563681  
C,0.3453971122,4.1126339939,-0.5059234248  
C,-1.6507539611,-2.7056052305,-0.1359657252  
C,0.7154523132,-2.8223039101,0.5296916607  
C,0.7266649306,-4.1507010447,0.1996461626  
C,-0.4348339214,-4.7819941988,-0.3126332478

### Stilbene 10

C,-0.5312877949,0.0756856318,1.2184368535  
C,0.0578776888,1.3222639442,0.6843418394  
C,-0.5996750148,2.5022854962,0.3737678915  
C,0.1129439998,-1.1794201319,0.6987351227  
C,-0.6459069834,-2.0171539097,-0.1198742566  
C,1.4518207398,-1.4781028512,0.9705930398  
C,2.0370685937,-2.606588223,0.4153704877  
C,-0.0708119755,-3.1524931463,-0.6807316922  
C,1.2600378713,-3.4166038579,-0.4021887375  
C,0.1701012113,3.5756061675,-0.1705511783  
C,-2.0043176874,2.6903314575,0.5692804243  
C,-2.5878049295,3.8797594851,0.2254168833  
C,-1.8182865378,4.9324922337,-0.3315314946  
C,-0.4333104332,4.7588073214,-0.5221771508  
H,-1.6161454169,0.0336803511,1.1480769662  
H,1.1365261889,1.2818622801,0.5281147571  
H,-1.6882346187,-1.7904773501,-0.3225413823  
H,2.0266683277,-0.8499120332,1.6450922734  
H,3.0685003012,-2.874647435,0.6082795245  
H,-0.6296275478,-3.8273279188,-1.3173032679  
H,1.2387452797,3.4400604959,-0.3106887987  
H,-2.6054297962,1.9027732398,1.011217202  
H,-3.6512472849,4.031632619,0.3795880298  
H,0.1520835773,5.5690348806,-0.9427908706  
N,1.8805529406,-4.619949375,-0.9975721133  
O,1.1740238911,-5.3123751791,-1.7006827607  
O,3.0497127036,-4.8199245347,-0.7400613698  
C,-2.4903379676,6.2090806201,-0.7129763145  
H,-3.0991309645,6.5825215921,0.1159265823  
H,-1.7765665907,6.9770500797,-1.0092159878  
H,-3.1739952793,6.0259216032,-1.5502490145  
Br,-0.1138513417,0.4333364469,3.1182837545

### Stilbene 12

C,-0.5729605184,-0.4534779897,0.6172525408  
C,0.5731559407,0.4534747903,0.6172555578  
C,0.5048897299,1.8702049131,0.2990749804  
C,-0.5046896695,-1.8702092027,0.2990740073  
C,-1.6724703839,-2.4771704666,-0.1849274203  
C,0.6792674445,-2.6176279969,0.4207032841  
C,0.6919400861,-3.946697853,0.0371187582  
C,-1.6491288643,-3.8088476431,-0.5796518429  
C,-0.46967542,-4.5398935483,-0.4691906421  
C,1.672678275,2.4771662153,-0.184908186  
C,-0.6790696164,2.6176237469,0.4206846012  
C,-0.6917362199,3.9466932609,0.0370990098  
C,0.4698874797,4.5398887345,-0.4691920553

C,-1.6193455731,-4.0372875717,-0.473965656  
H,1.5118048269,-0.251130964,1.0655565496  
H,-1.527185414,-0.210652173,0.5344996201  
H,2.3176475604,1.3560339552,-0.4392410158  
H,-1.3907681986,2.1110253401,1.6149653424  
H,-1.5005295211,4.3584213311,0.5766342842  
H,2.2161314869,3.6166258068,-1.4473913619  
H,-2.5641513833,-2.1295083821,-0.2536018987  
H,1.6085397935,-2.3607064747,0.9372627377  
H,1.6293277081,-4.7388358693,0.3304662513  
H,-2.5067486499,-4.5255936229,-0.8614128727  
C,0.2848857937,5.4247448027,-1.0947989031  
N,0.2333048039,6.4768414978,-1.5716110618  
C,-0.3831277128,-6.2294929913,-0.6727154779  
H,-0.0373341137,-6.8187349679,0.1826839342  
H,-1.3517968156,-6.6075981388,-0.9976066907  
H,0.3441158984,-6.384581967,-1.4775253336  
Br,0.0356707626,0.0441873982,3.0749467928

### Stilbene 13

C,-1.2786092253,-0.2361187745,0.9288436567  
C,-1.4733754442,-1.640782583,0.5575858329  
C,-2.6963981513,-2.2746340702,0.2081429524  
C,-0.0057322128,0.4514701292,0.5985694407  
C,-0.0855167232,1.7206970798,0.0269810556  
C,1.2401670633,-0.1571250018,0.7999627485  
C,2.3937898322,0.4981684109,0.4070328435  
C,1.0760336003,2.3765591006,-0.3735003184  
C,2.3047022377,1.7606544173,-0.1846919308  
C,-2.6197526433,-3.5867750051,-0.3110554591  
C,-3.9533183533,-1.6344494368,0.321284606  
C,-5.0928776062,-2.2906629328,-0.0950339599  
C,-4.9984156424,-3.5844407043,-0.6281776137  
C,-3.7673954609,-4.2324029029,-0.7376805509  
H,-2.1605931983,0.3966302833,0.8658063128  
H,-0.5557111897,-2.2075307909,0.4032927842  
H,-1.0498534656,2.1992627831,-0.1150863662  
H,1.3115423844,-1.1194773271,1.3001021828  
H,3.3665498701,0.0450996419,0.5670686344  
H,1.0269277528,3.3619038943,-0.8217878583  
H,-1.6540318503,-4.0783424633,-0.3851465002  
H,-4.0328696845,-0.6418406462,0.7531743456  
H,-6.0605807122,-1.8104115362,-0.0087357662  
H,-5.9004340199,-4.0911296923,-0.9559726397  
H,-3.710819564,-5.2337130821,-1.1480769722  
C,3.5839645405,2.4358034961,-0.6176932562  
F,3.3630164557,3.6795878629,-1.0462451117  
F,4.4541635842,2.4871050401,0.3949586719  
F,4.1614209308,1.7486209853,-1.6084809126  
Br,-1.2940593325,-1.0587930203,2.7839443901

C,1.649342926,3.8088430086,-0.5796338823  
H,-1.5473390251,0.0162163261,0.5005911767  
H,1.5475355236,-0.0162206387,0.5006073112  
H,-2.5901497421,-1.9014661678,-0.2642000406  
H,1.5746690049,-2.1742113902,0.847518504  
H,1.6003583357,-4.5298718151,0.1354067885  
H,-2.5483337804,-4.275157259,-0.9653441883  
H,-0.4517417796,-5.5821232986,-0.769483568  
H,2.590358941,1.9014619082,-0.2641656007  
H,-1.5744781828,2.1742072712,0.8474851681  
H,-1.6001561273,4.5298672017,0.1353717796  
H,0.4519584812,5.5821182738,-0.769486029  
H,2.5485538825,4.2751525705,-0.9653121917  
Br,0.0000852791,-0.0000009513,2.6292521793

### Stilbene 14

C,0.733802762,-0.5303229112,1.0229483518  
C,0.1430331823,-1.7794700584,0.5183365378  
C,0.8098556767,-2.9681771315,0.1822207345  
C,0.0705246892,0.7495103334,0.6225607048  
C,0.8416399874,1.699706682,-0.0486466407  
C,-1.2899044366,0.975924595,0.8574632287  
C,-1.8848819431,2.1441371409,0.4057348553  
C,0.2551723673,2.8749375756,-0.5065963865  
C,-1.0960840902,3.0654015747,-0.2713103886  
C,0.0324452994,-4.0197886803,-0.3730884352  
C,2.2119183674,-3.1393854884,0.3458041238  
C,2.8048168459,-4.3169491697,-0.0505638262  
C,2.0207609665,-5.3366931523,-0.6152518082  
C,0.639862907,-5.1920241653,-0.7780997883  
H,1.819281978,-0.4819747338,0.9787318169  
H,-0.9336180336,-1.7382782944,0.3511344219  
H,1.9000255984,1.5285735773,-0.2196611536  
H,-1.8776696175,0.2604419906,1.4259729036  
H,-2.9329789323,2.3596123083,0.5734294244  
H,0.821273921,3.6349541662,-1.0309830277  
H,-1.0396705908,-3.8869535562,-0.4855238175  
H,2.8135604673,-2.3585108167,0.7991316472  
H,3.8716665315,-4.461648098,0.0729007831  
H,2.499304555,-6.2598073219,-0.9274637919  
H,0.0539749767,-5.9933369241,-1.2124739183  
N,-1.7285440935,4.3126366992,-0.755387286  
O,-1.0130071442,5.1008508185,-1.3373542935  
O,-2.9142278727,4.4473308056,-0.5347563366  
Br,0.2630213065,-1.1217574831,2.870176607

### Stilbene 15

C,-0.4924025221,-0.3356346169,0.9245924558  
C,0.5974758854,-1.228154007,0.5115490952  
C,0.5087084482,-2.6019185056,0.1928205057  
C,-0.4293906109,1.1020660375,0.5412353364  
C,-1.5443891568,1.6569959512,-0.0883788888  
C,0.7196989373,1.8725900136,0.7501290003  
C,0.7601774156,3.1854001108,0.3116051702  
C,-1.5085457104,2.9727568432,-0.5338598024  
C,-0.354572732,3.7340638294,-0.3368261739  
C,1.672042718,-3.2266084005,-0.3202223188  
C,-0.6889913521,-3.3486872444,0.3305758047  
C,-0.7149378492,-4.6720696824,-0.0531515664  
C,0.4415866514,-5.269247325,-0.5782103497  
C,1.6320696903,-4.5517281883,-0.7132819296  
H,-1.4917641725,-0.761301554,0.875014196  
H,1.5555738604,-0.7352358855,0.3474834668  
H,-2.4419763182,1.0649652945,-0.2392421327  
H,1.5688517604,1.462671354,1.2905720686  
H,1.6409601901,3.7959509916,0.4737680793  
H,-2.3677448393,3.412610305,-1.026846977  
H,2.5896995042,-2.6530233781,-0.4132160925  
H,-1.5785090063,-2.8942790212,0.754771661  
H,-1.623577249,-5.2533514005,0.0513980699  
H,2.5162144252,-5.0305591603,-1.1171936004  
C,-0.3110572042,5.0982366117,-0.7937980847  
N,-0.2735020099,6.1931160115,-1.1633364908  
H,0.4096308523,-6.3113365152,-0.8802303417  
Br,0.1959168509,-0.6996471072,2.7816648393

### Stilbene 17

C,-0.6005059392,0.9326806683,0.6477753804  
C,0.5305398996,0.0254582466,0.8487507723  
C,0.4581364901,-1.407508597,0.5039129405  
C,-0.5164373248,2.3394394774,0.3423517724  
C,-1.6713031605,2.9547291684,-0.1724103078  
C,0.6689546248,3.0843562084,0.5021310913  
C,0.7010549856,4.4126084248,0.1305510495  
C,-1.6394101947,4.2848844528,-0.5582883281  
C,-0.4530005177,5.0105059705,-0.4063354828  
C,1.6008718769,-1.9916943732,-0.050374219  
C,-0.7151463222,-2.1560956708,0.6726692741  
C,-0.7535195581,-3.478483243,0.2639382713  
C,0.3914679721,-4.0248503531,-0.3055628947  
C,1.5696468265,-3.3170556125,-0.4708155404  
H,-1.5614794463,0.4506735193,0.4744606634  
H,1.5199209366,0.4713261465,0.7764072347

### Stilbene 16

C,-0.5298784667,-0.9277025243,0.9141988957  
C,0.5575820297,0.0241904294,0.6803560917  
C,0.412460935,1.4304320477,0.4099417215  
C,-0.4164795824,-2.3505359368,0.5321745972  
C,-1.5496874685,-2.9606566253,-0.0127899127  
C,0.7846431804,-3.0616247716,0.6588998437  
C,0.8595845475,-4.3722753789,0.218001768  
C,-1.482316172,-4.2742926407,-0.4649161785  
C,-0.2776426166,-4.9448482877,-0.340655571  
C,1.5241374748,2.0949997776,-0.1359870457  
C,-0.7938874368,2.1288509929,0.6264246622  
C,-0.8818073328,3.4608349274,0.2791296043  
C,0.2283420457,4.1030210804,-0.2847498695  
C,1.4272811268,3.4322689624,-0.4959931403  
H,-1.5369978135,-0.5184614234,0.8821481766  
H,1.5291333905,-0.4196391913,0.4675841037  
H,-2.4831708754,-2.4127262272,-0.0961639831  
H,1.6503273499,-2.6115698852,1.1372567862  
H,1.765828525,-4.959258918,0.3030234968  
H,-2.3363513476,-4.7792347506,-0.8995366624  
H,2.4550876497,1.5579343726,-0.2915178991  
H,-1.646516602,1.6405394094,1.088354092  
H,-1.800629089,4.0153580663,0.4367981209  
H,2.2705912073,3.9528810866,-0.9341532949  
N,-0.1976240655,-6.3461444147,-0.8153408406  
O,-1.2075088184,-6.8209311041,-1.2896218963  
O,0.8727239415,-6.9035808929,-0.6925304725  
C,0.1013306384,5.5732299068,-0.625175077  
F,-1.0341553275,5.7966582552,-1.2893738975  
F,0.0722158263,6.299007003,0.4938134986  
F,1.1221808721,5.9887487445,-1.3725585137  
Br,0.1974657744,-0.5242360899,2.7923440377

### Stilbene 18

C,-0.4979301834,0.4756357574,0.5440555162  
C,0.4954899745,0.4747967733,-0.5288198722  
C,1.9053745779,0.1514683746,-0.3456158749  
C,-1.9099343939,0.1623332695,0.3587005428  
C,-2.5995312094,-0.3572090412,1.4602702021  
C,-2.5644904373,0.3234326288,-0.8752161754  
C,-3.8857752742,-0.0582685857,-1.0016778365  
C,-3.9262125715,-0.7526715732,1.3264415856  
C,-4.55700038,-0.6026643287,0.0989812722  
C,2.5912833952,-0.3667489149,-1.4501717288  
C,2.5605724918,0.2993743621,0.8896526218  
C,3.8790239984,-0.0925403949,1.0139166803  
C,4.5476669933,-0.6314470565,-0.0909999982  
C,3.9156298442,-0.770872859,-1.3190476502  
H,-0.1074811028,0.346134209,1.5514314378  
H,0.1039427647,0.3541034105,-1.5368823556

H,-2.5883092358,2.3837113753,-0.282451293  
H,1.5548984572,2.6372088091,0.9424858129  
H,1.6024101056,5.0022438118,0.2508554532  
H,-2.5191052111,4.766820352,-0.9684737552  
H,2.5129622535,-1.4143845319,-0.1661300723  
H,-1.5861714246,-1.724836345,1.1586307767  
H,-1.6368701688,-4.0941528266,0.3813738158  
H,2.4314436878,-3.8027814933,-0.9119796859  
C,-0.4115420003,6.3936054449,-0.7961874651  
N,-0.3756175683,7.5061388023,-1.1094518703  
N,0.3501083545,-5.4391707662,-0.7461862501  
O,-0.6984072644,-6.0285185234,-0.5896426995  
O,1.366595773,-5.8907576119,-1.2286666418  
Br,-0.1535834691,0.4501788293,2.7460471976

### Stilbene 19

C,0.6796111211,1.3787781829,0.7481198156  
C,-0.4650432969,0.4688348916,0.7758017151  
C,-0.4058232508,-0.9532033312,0.4907839097  
C,0.5817013454,2.7966479164,0.3950795371  
C,1.6937932114,3.3831783031,-0.2202839561  
C,-0.5830028984,3.5484760414,0.6147720987  
C,-0.6411432571,4.8650444361,0.1983895126  
C,1.6365976707,4.7019408343,-0.6497539966  
C,0.4685416393,5.4395968367,-0.4416378016  
C,-1.5935494622,-1.5731250597,0.0781977526  
C,0.7876116126,-1.6942284538,0.574076977  
C,0.7880800917,-3.0292463873,0.2214721651  
C,-0.3980201477,-3.6287769207,-0.2174226246  
C,-1.5867051473,-2.913436824,-0.288846281  
H,1.6499383796,0.9162729217,0.5808492308  
H,-1.4439625096,0.9375706476,0.6938918195  
H,2.600424206,2.8065179197,-0.3766583722  
H,-1.4306738751,3.122288206,1.1440988289  
H,-1.5306083303,5.4611084807,0.366522682  
H,2.487534664,5.1631472982,-1.1372946345  
H,-2.5174577409,-1.0043833012,0.0316143396  
H,1.7011713334,-1.2410625382,0.9479072973  
H,1.694911621,-3.6201105143,0.2921074411  
H,-2.4958710504,-3.4029176989,-0.6177650262  
C,0.4025496638,6.8090741897,-0.8772782663  
N,0.3469459493,7.9094489953,-1.2278162179  
C,-0.3511344982,-5.0804039783,-0.642298782  
F,0.3576236458,-5.7989380781,0.2311328312  
F,-1.574515723,-5.6013924527,-0.7290809844  
F,0.2381257581,-5.1892654169,-1.8350362783  
Br,0.2102027643,0.9818459212,2.7557402677

H,-2.0976734511,-0.4654739681,2.4171597313  
H,-2.0574768318,0.7805620532,-1.7203115625  
H,-4.4103451334,0.0696092304,-1.9426181344  
H,-4.4689700048,-1.1652782767,2.1686295566  
H,2.087878874,-0.4684041499,-2.4069808769  
H,2.0555758052,0.7512136813,1.7387712067  
H,4.4013666911,0.0165566064,1.9584626402  
H,4.4540700759,-1.1869130855,-2.162327314  
C,-5.9940725383,-1.0349898347,-0.0884789495  
F,-6.5591119523,-1.3698733926,1.0710403586  
F,-6.7072077986,-0.0502064191,-0.6401634668  
F,-6.0547436683,-2.0883033924,-0.9069996699  
C,5.997267926,-1.0269786202,0.0806501228  
F,6.1392056881,-1.8167859227,1.1480264514  
F,6.4577671861,-1.6736152672,-0.9897320438  
F,6.7508907828,0.0578034134,0.2749636642  
Br,0.0054558618,2.4709183135,0.0136459187

### Stilbene 20

C,0.0950491493,0.7252349243,0.766998945  
C,-0.0950788904,-0.7252718336,0.7669999189  
C,-1.3579096012,-1.3889535222,0.4473152743  
C,1.3578802154,1.3889163312,0.4473155099  
C,1.2809941113,2.6776368553,-0.0967602786  
C,2.6027519456,0.7629578802,0.6253305828  
C,3.760921902,1.4123976749,0.2373370012  
C,2.438818507,3.3327733367,-0.4993977143  
C,3.6478750704,2.6812126197,-0.3232750941  
C,-1.2810227665,-2.6776743132,-0.0967597221  
C,-2.602781553,-0.7629950242,0.625328479  
C,-3.7609510127,-1.4124350851,0.2373338086  
C,-3.6479034386,-2.6812503281,-0.3232774748  
C,-2.4388466323,-3.3328110632,-0.4993982479  
H,-0.8057605689,1.3218164146,0.6365913918  
H,0.8057309353,-1.3218535558,0.6365942327  
H,0.3184247713,3.1646686113,-0.2191533789  
H,2.6760752098,-0.2116611264,1.0994478068  
H,4.7416079696,0.9696698705,0.3615476025  
H,2.4203734942,4.3247843397,-0.9339962373  
H,-0.3184532639,-3.1647060992,-0.2191513759  
H,-2.6761054271,0.2116242226,1.0994451322  
H,-4.7416372643,-0.9697072497,0.3615429793  
H,-2.4204010288,-4.3248222789,-0.9339962218  
N,4.8900187608,3.3750626369,-0.7429879117  
O,4.7606500481,4.4809386844,-1.2218389983  
O,5.9309280122,2.7768285208,-0.5727980426  
N,-4.8900465692,-3.3751006267,-0.7429914552  
O,-5.9309560272,-2.7768663978,-0.5728030599  
O,-4.7606773421,-4.4809768719,-1.2218418928  
Br,-0.0000163488,-0.0000174379,2.7506836831

### Stilbene 21

C,0.5703482253,0.4575419764,0.7065529967  
C,-0.5704123631,-0.4575773364,0.7065529967  
C,-0.4867677601,-1.8782806094,0.3888210699  
C,0.4867036224,1.8782452493,0.3888210699  
C,1.6385855168,2.4902105562,-0.1236218761  
C,-0.6982443308,2.6177055657,0.5408526668  
C,-0.7347377398,3.9448451005,0.1593872373  
C,1.6033798009,3.8197354405,-0.5189634077  
C,0.4164074369,4.5437731555,-0.3783391097  
C,-1.6386496546,-2.4902459163,-0.1236218761  
C,0.698180193,-2.6177409257,0.5408526668  
C,0.734673602,-3.9448804606,0.1593872373  
C,-0.4164715746,-4.5438085156,-0.3783391097  
C,-1.6034439386,-3.8197708006,-0.5189634077  
H,1.5481494962,-0.0031040371,0.5810107504  
H,-1.5482136339,0.0030686771,0.5810107504  
H,2.5588259104,1.923201188,-0.2268577201  
H,-1.58110737,2.1720703417,0.9902786652  
H,-1.6387485852,4.5312314501,0.2759716656  
H,2.4845175132,4.3002679597,-0.9278271306  
H,-2.5588900482,-1.9232365481,-0.2268577201  
H,1.5810432322,-2.1721057017,0.9902786652  
H,1.6386844474,-4.5312668102,0.2759716656  
H,-2.484581651,-4.3003033197,-0.9278271306  
C,0.372348311,5.9246374051,-0.7784210715  
N,0.3342740925,7.0344897109,-1.1003589706  
C,-0.3724124488,-5.9246727652,-0.7784210715  
N,-0.3343382303,-7.0345250709,-1.1003589706  
Br,-0.0000320689,-0.00001768,2.7024134688

### Stilbazole 23

C,-0.2184848909,-0.1245711452,0.5182755511  
C,0.8183159492,0.228920583,-0.4741052644  
C,2.1372819543,-0.4564839861,-0.2457693583  
C,-1.5789282373,-0.281374863,0.3001525956  
C,-2.3964308208,-0.6626904421,1.4074311472  
C,-2.1934451242,-0.0856492052,-0.9762277076  
C,-3.5415281558,-0.2757283884,-1.1210584338  
C,-3.746165038,-0.860505937,1.2425829112  
C,-4.3415833285,-0.6721130035,-0.0201188717  
C,2.555785405,-1.4207039623,-1.1574158017  
C,2.9213703937,-0.2093429566,0.8798786701  
C,4.0878325025,-0.9506552738,1.0413860155  
N,4.4969499048,-1.8830667159,0.1786732028  
C,3.7441315928,-2.1035872947,-0.8962190577  
H,0.1587174386,-0.2715936831,1.5310444407  
H,0.4915330513,0.1470142872,-1.5085959974  
H,-1.9345019063,-0.8019341919,2.3806723212  
H,-1.5998512069,0.2349629833,-1.8257033291

### Stilbazole 22

C,-0.6365806721,-0.473769912,0.4777851957  
C,0.4598108045,-1.2976599518,1.0457742641  
C,0.5241163697,-2.6728954892,0.4336883978  
C,-0.6269863311,0.8783481503,0.2355121809  
C,-1.7921421824,1.4872159118,-0.3525266844  
C,0.4888751385,1.722238423,0.5629951307  
C,0.4566142553,3.062432853,0.3160573648  
C,-1.8308929199,2.8200805206,-0.6148382441  
C,-0.7060708546,3.6300958761,-0.2856131758  
C,1.5642521091,-2.9747596552,-0.4395439802  
C,-0.4623395323,-3.6316975722,0.6578918606  
C,-0.3611256583,-4.8472227856,-0.011601315  
N,0.6281468042,-5.1470153812,-0.8559847778  
C,1.5682047783,-4.2263623986,-1.0557798055  
H,-1.5447716317,-1.0307311838,0.2452367815  
H,1.4316916801,-0.8087286675,1.0138228673  
H,-2.6440062555,0.8584898729,-0.5937923188  
H,1.3646776174,1.295590112,1.0403355337  
H,1.2996026252,3.6882715588,0.5788774275  
H,-2.690444053,3.303164306,-1.0640665961  
H,2.3603004605,-2.264777101,-0.6414871581  
H,-1.2707393735,-3.4552733385,1.3608052632  
H,-1.1093530568,-5.6194594871,0.1442177794  
H,2.3693145294,-4.4949608286,-1.7390803398  
O,-0.8301590669,4.8968409781,-0.5673627842  
C,0.2285374912,5.8274432883,-0.2836551637  
H,-0.1425119328,6.7911623464,-0.6214107899  
H,0.4246399981,5.8546133843,0.7902827603  
H,1.1269004398,5.5532569851,-0.8406480975  
Br,-0.069376588,-1.3347446162,2.9434936658



H,-4.0147637294,-0.1206959565,-2.0852479607  
H,-4.3634603589,-1.1571197254,2.0834598143  
H,1.9838904654,-1.6432335906,-2.0528122781  
H,2.6566360249,0.5627082293,1.5959916707  
H,4.7267807031,-0.7808679472,1.9035167503  
H,4.1018510537,-2.8598321184,-1.5895794698  
C,-5.8041932132,-0.8946412433,-0.2172823345  
H,-6.3310786543,-1.0208076232,0.7281394607  
H,-6.24908731,-0.0638284662,-0.7721359585  
H,-5.9553610592,-1.7973920568,-0.8212326885  
Br,0.8644015943,2.1587346934,-0.0541470397

**Table S4:** Cartesian coordinates for the geometries of the charge transfer complexes between bromine and substituted stilbenes and stilbazoles optimised at the MP2/6-31G(d,p) level of theory with the inclusion of BSSE through the CP correction.

#### Stilbene 1

C,0.0183427586,-0.6797026846,0.2022638574  
C,-0.0183536774,0.6797055015,0.2022638602  
C,-2.175788429,-3.700441926,0.6607302375  
C,-1.0753577721,-2.8570082721,0.6705001319  
C,-1.1535012914,-1.5503260932,0.1517382042  
C,-2.3720924363,-1.1361287232,-0.4054303256  
C,-3.4904080596,-1.9704066418,-0.4140856895  
C,-3.3934947531,-3.2599121428,0.1228810988  
C,1.1534903719,1.5503289103,0.151738194  
C,1.0753468597,2.8570110873,0.6705001276  
C,2.1757775165,3.7004447412,0.6607302211  
C,3.3934838332,3.25991496,0.1228810639  
C,3.4903971322,1.970409461,-0.4140857305  
C,2.3720815091,1.1361315424,-0.4054303542  
O,4.4149095587,4.1701634836,0.1627702931  
C,5.6679006395,3.7470065806,-0.3632506492  
O,-4.4149204781,-4.1701606665,0.1627703387  
C,-5.6679115662,-3.7470037616,-0.3632505847  
H,-0.9859650239,1.1728846934,0.2477508785  
H,0.9859541057,-1.1728818767,0.2477508605  
H,0.1421600163,3.2031934092,1.1000207622  
H,2.4463452012,0.1558575994,-0.8606744141  
H,4.4091273782,1.6161902948,-0.8584753979  
H,2.1244029539,4.7028984618,1.0647064272  
H,-0.1421709227,-3.2031905956,1.1000207523  
H,-2.4463561347,-0.1558547786,-0.8606743809  
H,-4.4091383117,-1.616187474,-0.8584753429  
H,-2.1244138608,-4.7028956481,1.0647064392  
H,6.3398923259,4.5882448752,-0.226580624  
H,6.0520214416,2.8795141103,0.1764929632  
H,5.5928338201,3.507908422,-1.4257223241  
H,-6.3399032507,-4.5882420567,-0.2265805533  
H,-6.0520323608,-2.8795112933,0.1764930362  
H,-5.5928447614,-3.5079055991,-1.4257222598

#### Stilbene 2

C,-0.31686,-1.438353,0.596839  
C,0.570239,-1.545576,-0.427569  
C,2.011926,-1.731617,-0.271665  
C,-1.766494,-1.341872,0.445216  
C,-2.533825,-0.726096,1.452457  
C,-2.438876,-1.849879,-0.675824  
C,-3.820623,-1.719019,-0.817667  
C,-3.908694,-0.596089,1.329002  
C,-4.560988,-1.087429,0.189159  
C,2.878593,-1.32879,-1.301214  
C,2.573157,-2.316946,0.876312  
C,3.953167,-2.449212,1.00212  
C,4.819272,-2.033567,-0.018256  
C,4.25715,-1.471581,-1.171712  
H,0.065224,-1.412815,1.6141  
H,0.197956,-1.482647,-1.446789  
H,-2.037923,-0.332376,2.332355  
H,-1.881309,-2.376323,-1.441114  
H,-4.302121,-2.129786,-1.693128  
H,-4.503243,-0.117188,2.095743  
H,2.464397,-0.885191,-2.199766  
H,1.924895,-2.689124,1.660487  
H,4.364858,-2.909809,1.893382  
H,4.906072,-1.150347,-1.978832  
O,-5.917595,-0.908084,0.167708  
C,-6.606694,-1.385144,-0.982736  
H,-7.65086,-1.138137,-0.819625  
H,-6.251129,-0.89365,-1.89015  
H,-6.49922,-2.466062,-1.090783  
C,6.311366,-2.151391,0.138069  
H,6.573877,-3.00427,0.762925  
H,6.798189,-2.276848,-0.828328  
H,6.728287,-1.257666,0.605443  
Br,0.427803,1.475646,0.012048

Br,-0.0000054389,0.000001403,3.1746013458  
Br,-0.0000054227,0.0000013986,5.5171277757

### Stilbene 3

C,-0.5983171813,-0.5147136726,0.0946150606  
C,0.5399693819,-1.2564631786,0.1156367792  
C,0.5894754193,-2.716512559,0.0310973004  
C,-0.6492650925,0.9452589797,0.0910268125  
C,-1.7898384339,1.6044638833,0.5878985721  
C,0.4034815397,1.7311990066,-0.3996245448  
C,0.3494832567,3.1248492786,-0.3645646383  
C,-1.8608187001,2.9887385572,0.6218455779  
C,-0.7880315038,3.7587256681,0.1502549803  
C,1.6852080765,-3.4029573291,0.5811755047  
C,-0.4272436115,-3.4618345092,-0.5909428181  
C,-0.3649288248,-4.8532228611,-0.6261500651  
C,0.7225884474,-5.5246327735,-0.0618238743  
C,1.7505521764,-4.7938329941,0.5381268267  
H,-1.5546161172,-1.031446802,0.0904472848  
H,1.4940039937,-0.7443870293,0.2093049529  
H,-2.6200837279,1.0185742421,0.9654870097  
H,1.2706593902,1.2514655295,-0.8373055877  
H,1.1783260746,3.6947747689,-0.7585090943  
H,-2.7310966866,3.5016921637,1.009410682  
H,2.4785999503,-2.8381260576,1.0573750636  
H,-1.252691004,-2.947074942,-1.0673124981  
H,-1.1545586208,-5.4135242331,-1.1110170415  
H,0.7724703077,-6.6054390218,-0.0977855789  
H,2.5992931323,-5.3067533708,0.9727127596  
O,-0.9608585109,5.1139560468,0.2286307516  
C,0.1163171429,5.922935202,-0.2311685868  
H,-0.2019238708,6.948380545,-0.0728789877  
H,1.0278365623,5.7300373108,0.3374154612  
H,0.3106696129,5.7601252773,-1.2929097818  
Br,-0.1072312279,-0.967259035,3.0971248992  
Br,-0.1698907373,-1.0194674285,5.4354068187

### Stilbene 5

C,0.311316,-1.309531,0.603557  
C,-0.634232,-1.403916,-0.366761  
C,-2.076769,-1.442604,-0.154902  
C,1.75368,-1.316516,0.363552  
C,2.616854,-1.743761,1.387752  
C,2.318864,-0.905151,-0.85789  
C,3.691638,-0.962314,-1.070706  
C,3.994805,-1.797172,1.202172  
C,4.507299,-1.407031,-0.031929  
C,-2.902075,-1.926078,-1.179961

Br,0.655394,3.80499,-0.04327

### Stilbene 4

C,-0.866787,-1.374678,0.566663  
C,0.01513,-1.31048,-0.464156  
C,1.469469,-1.257473,-0.312928  
C,-2.314539,-1.504029,0.427816  
C,-3.155883,-1.047644,1.46044  
C,-2.911663,-2.076039,-0.704977  
C,-4.298142,-2.160247,-0.831946  
C,-4.53535,-1.130916,1.350488  
C,-5.116316,-1.683448,0.199935  
C,2.248031,-0.65697,-1.31711  
C,2.121819,-1.789623,0.813228  
C,3.503378,-1.696491,0.946568  
C,4.256505,-1.080767,-0.057063  
C,3.631134,-0.568913,-1.196813  
H,-0.484008,-1.308028,1.581981  
H,-0.367202,-1.284697,-1.480785  
H,-2.717198,-0.609292,2.349563  
H,-2.28814,-2.48455,-1.491171  
H,-4.720025,-2.614438,-1.716611  
H,-5.188382,-0.775369,2.136466  
H,1.758553,-0.245403,-2.191995  
H,1.544888,-2.29925,1.574729  
H,3.997804,-2.104577,1.817861  
H,4.220551,-0.094174,-1.969432  
O,-6.483299,-1.718535,0.19388  
C,-7.104635,-2.26446,-0.965236  
H,-8.172152,-2.189431,-0.785098  
H,-6.842784,-1.696479,-1.859661  
H,-6.830159,-3.311319,-1.107011  
C,5.748146,-1.056168,0.048279  
F,6.160964,-0.980394,1.335584  
F,6.304061,-2.175528,-0.477323  
F,6.284091,-0.003239,-0.612287  
Br,-0.600838,1.679364,0.010026  
Br,-0.739996,4.010573,-0.021534

### Stilbene 6

C,-0.426688,-1.447754,-0.378197  
C,0.529472,-1.42292,0.586402  
C,1.966231,-1.530244,0.338638  
C,-1.866943,-1.387082,-0.15638  
C,-2.440664,-0.922666,1.044789  
C,-3.81468,-0.917502,1.219867  
C,-4.663491,-1.361982,0.193486  
C,-4.116965,-1.808349,-1.014488  
C,-2.730966,-1.812114,-1.175438  
C,2.803006,-2.012711,1.360164

C,-2.689541,-1.019057,1.042045  
C,-4.061916,-1.108225,1.207084  
C,-4.870807,-1.609949,0.174877  
C,-4.286161,-2.017559,-1.028902  
H,0.000107,-1.307993,1.643976  
H,-0.305573,-1.51673,-1.396846  
H,2.198115,-2.048574,2.339705  
H,1.680808,-0.519462,-1.642717  
H,4.135902,-0.647421,-2.003246  
H,4.663818,-2.129349,1.981978  
H,-2.453257,-2.246586,-2.1136  
H,-2.090937,-0.594294,1.838376  
H,-4.541983,-0.778072,2.118894  
H,-4.883813,-2.399583,-1.843494  
N,5.95909,-1.459115,-0.244852  
O,6.666438,-1.848917,0.699578  
O,6.391466,-1.112001,-1.356945  
O,-6.209171,-1.645707,0.449073  
C,-7.060658,-2.134523,-0.582841  
H,-8.066298,-2.082588,-0.178453  
H,-6.992915,-1.51466,-1.478525  
H,-6.820752,-3.168304,-0.837564  
Br,-0.214127,1.700284,0.047599  
Br,-0.26303,4.032308,-0.027344

#### Stilbene 7

C,0.465139,-1.575883,-0.49519  
C,-0.465171,-1.575873,0.495191  
C,-1.911738,-1.615354,0.286884  
C,1.911706,-1.615378,-0.286883  
C,2.768718,-1.109838,-1.278413  
C,2.488047,-2.158054,0.874449  
C,3.868863,-2.150719,1.050126  
C,4.149072,-1.112536,-1.098777  
C,4.723903,-1.632371,0.06806  
C,-2.768745,-1.109798,1.27841  
C,-2.488085,-2.158031,-0.874444  
C,-3.868901,-2.150685,-1.050121  
C,-4.723936,-1.632321,-0.068059  
C,-4.149099,-1.112483,1.098775  
H,0.12664,-1.532386,-1.527074  
H,-0.126672,-1.532374,1.527075  
H,2.343773,-0.697389,-2.186722  
H,1.853607,-2.606627,1.6294  
H,4.293347,-2.580873,1.950536  
H,4.790263,-0.713935,-1.877034  
H,-2.343795,-0.697347,2.186716  
H,-1.85365,-2.606617,-1.629392  
H,-4.293389,-2.580841,-1.950528  
H,-4.790286,-0.713869,1.877028  
C,6.213564,-1.599529,0.278915

C,4.171248,-2.162466,1.163517  
C,4.732254,-1.818256,-0.075339  
C,3.915677,-1.318648,-1.103029  
C,2.551748,-1.165211,-0.887909  
H,-0.113566,-1.580651,-1.410676  
H,0.225007,-1.40287,1.628689  
H,-1.808422,-0.540196,1.836539  
H,-4.264398,-0.555325,2.134982  
H,-4.745326,-2.147988,-1.824729  
H,-2.311969,-2.162385,-2.112248  
H,1.937994,-0.73871,-1.671153  
H,4.359158,-1.033324,-2.04823  
H,4.805676,-2.540024,1.954885  
H,2.369161,-2.2834,2.315789  
C,6.142427,-1.968502,-0.290936  
N,7.305905,-2.094844,-0.469308  
O,-5.999216,-1.305792,0.47728  
C,-6.889544,-1.734267,-0.548587  
H,-7.886371,-1.613476,-0.137131  
H,-6.785632,-1.120091,-1.44474  
H,-6.723186,-2.781971,-0.805128  
Br,0.210787,1.6112,0.030436  
Br,0.321257,3.941791,-0.047845

#### Stilbene 8

C,0.594613,-1.544797,-0.415292  
C,-0.329181,-1.762399,0.555113  
C,-1.725295,-2.135388,0.320086  
C,2.005539,-1.230526,-0.191869  
C,2.93096,-1.484836,-1.216863  
C,2.483221,-0.676511,1.008838  
C,3.83962,-0.420598,1.180039  
C,4.287411,-1.222663,-1.039528  
C,4.766827,-0.691649,0.163439  
C,-2.688009,-1.841106,1.300126  
C,-2.137456,-2.798667,-0.848729  
C,-3.478626,-3.119838,-1.044849  
C,-4.429251,-2.805841,-0.07012  
C,-4.028339,-2.167775,1.105464  
H,0.29408,-1.6623,-1.453122  
H,-0.031869,-1.657079,1.594761  
H,2.581453,-1.902522,-2.154642  
H,1.790252,-0.425522,1.80267  
H,4.186098,0.007396,2.114271  
H,4.98299,-1.43682,-1.843238  
H,-2.38026,-1.337531,2.209535  
H,-1.403662,-3.080817,-1.593711  
H,-3.780377,-3.632868,-1.949427  
H,-5.469719,-3.062839,-0.222555  
H,-4.757704,-1.926196,1.86831

H,6.745255,-1.657309,-0.670078  
H,6.518993,-0.676222,0.774105  
H,6.539777,-2.431978,0.901297  
C,-6.213597,-1.599464,-0.278913  
H,-6.539816,-2.431904,-0.901304  
H,-6.745288,-1.65725,0.67008  
H,-6.519018,-0.676149,-0.774093  
Br,0.000008,1.419336,-0.000001  
Br,0.000044,3.759035,-0.000001

#### Stilbene 9

C,-1.028627,-1.572238,0.452949  
C,-0.129364,-1.415044,-0.551779  
C,1.311837,-1.248695,-0.360566  
C,-2.460134,-1.803912,0.269877  
C,-3.35409,-1.448484,1.293322  
C,-2.982853,-2.385575,-0.89791  
C,-4.355344,-2.562034,-1.046777  
C,-4.725038,-1.633586,1.138829  
C,-5.250249,-2.193075,-0.033007  
C,2.063352,-0.562989,-1.33005  
C,1.976842,-1.754419,0.770271  
C,3.342651,-1.554149,0.942079  
C,4.067795,-0.854924,-0.026914  
C,3.431366,-0.366689,-1.170847  
H,-0.678654,-1.502964,1.479756  
H,-0.48686,-1.394448,-1.577478  
H,-2.968353,-1.009389,2.206605  
H,-2.31109,-2.721423,-1.678731  
H,-4.738046,-3.019801,-1.952185  
H,-5.396529,-1.348766,1.940996  
H,1.563851,-0.171073,-2.208278  
H,1.424367,-2.327176,1.504555  
H,3.847013,-1.942708,1.816589  
H,3.999291,0.172876,-1.916521  
C,-6.734841,-2.357976,-0.215007  
H,-7.232569,-2.51032,0.741819  
H,-7.172841,-1.472853,-0.679355  
H,-6.958994,-3.211613,-0.853499  
C,5.549541,-0.712794,0.118882  
F,5.922314,-0.634606,1.418182  
F,6.207139,-1.770979,-0.415683  
F,6.014496,0.395288,-0.504055  
Br,-0.994041,1.516439,-0.007183  
Br,-1.306622,3.829613,0.023458

#### Stilbene 11

C,0.3215582484,-1.383421624,0.5303931878  
C,-0.6013601451,-1.6967786071,-0.413524724  
C,-2.0480544669,-1.7238673613,-0.205879457  
C,1.7703615794,-1.4072254053,0.3296678873

C,6.224884,-0.365281,0.342905  
H,6.847932,-0.995753,-0.290127  
H,6.429927,0.674109,0.081052  
H,6.534668,-0.512228,1.377017  
Br,-0.636802,1.250497,-0.082891  
Br,-1.241064,3.508309,-0.158062

#### Stilbene 10

C,0.111398,-1.468206,0.563162  
C,-0.795513,-1.596408,-0.438599  
C,-2.23571,-1.758827,-0.252124  
C,1.557198,-1.364861,0.366617  
C,2.341356,-0.702854,1.327682  
C,2.198433,-1.916136,-0.757352  
C,3.570164,-1.778198,-0.942575  
C,3.716395,-0.5639,1.169962  
C,4.305518,-1.102739,0.028876  
C,-3.111938,-1.37857,-1.282049  
C,-2.784679,-2.295957,0.925012  
C,-4.163852,-2.405782,1.075407  
C,-5.040736,-2.011756,0.055246  
C,-4.489981,-1.496705,-1.125189  
H,-0.242362,-1.418648,1.589035  
H,-0.444521,-1.554156,-1.466651  
H,1.862051,-0.280983,2.203136  
H,1.620383,-2.475215,-1.482234  
H,4.074158,-2.198742,-1.800055  
H,4.326157,-0.051515,1.899106  
H,-2.70618,-0.97331,-2.202264  
H,-2.129631,-2.650325,1.71185  
H,-4.567458,-2.830271,1.987897  
H,-5.147461,-1.193893,-1.932321  
N,5.756555,-0.964845,-0.151673  
O,6.39328,-0.370148,0.734237  
O,6.258068,-1.450664,-1.179569  
C,-6.531325,-2.104228,0.23897  
H,-6.795101,-2.93713,0.889567  
H,-6.927062,-1.192917,0.690413  
H,-7.035876,-2.246738,-0.715767  
Br,-0.609975,1.509063,-0.010403  
Br,-0.797858,3.833651,-0.060044

#### Stilbene 12

C,0.479873,-1.741664,0.480236  
C,-0.479746,-1.741708,-0.480223  
C,-1.920421,-1.779391,-0.225277  
C,1.920549,-1.77927,0.225288

C,2.6118535427,-1.5650831319,1.4443648755  
C,2.3616219504,-1.2577211909,-0.9382658059  
C,3.7409796225,-1.3108870086,-1.0945556974  
C,3.9945684032,-1.6133864696,1.3051012857  
C,4.5642312818,-1.4881899297,0.029507226  
C,-2.9018240767,-1.5994825853,-1.3142293656  
C,-2.6273271915,-1.8942723811,1.0634192709  
C,-4.0104245485,-1.8925870598,1.2151869698  
C,-4.863977604,-1.750153909,0.1122007866  
C,-4.2846870116,-1.6023186499,-1.1541667981  
H,-0.0156584249,-1.1510686701,1.5365410146  
H,-0.2603613799,-1.9447226198,-1.4151788276  
H,2.1717351429,-1.6644866966,2.4298045041  
H,1.7391494062,-1.0817720094,-1.8063503983  
H,4.1889014731,-1.1927153241,-2.072729263  
H,4.6333439035,-1.742209433,2.1691828084  
H,-2.4737150372,-1.4810387903,-2.3033955878  
H,-1.9959001384,-2.0479764582,1.9301245527  
H,-4.4373260828,-2.0325972534,2.2020424115  
H,-4.9234559599,-1.500014223,-2.0241795708  
C,5.9893277023,-1.5355044468,-0.1274486943  
N,7.1653268582,-1.5764304497,-0.2569160753  
C,-6.3576547167,-1.7165685852,0.2905448473  
H,-6.6657903866,-2.3349282933,1.1327501793  
H,-6.7060900163,-0.7000952331,0.480957102  
H,-6.8671012208,-2.0797116586,-0.6010598171  
Br,-0.3164903064,1.430385349,-0.604744511  
Br,-0.4441454002,3.6914561091,-1.1676143166

### Stilbene 13

C,-0.257314,-1.551138,-0.569506  
C,-1.143249,-1.795821,0.428851  
C,-2.544739,-2.167698,0.233676  
C,1.158999,-1.241959,-0.368753  
C,1.844363,-0.483738,-1.333156  
C,1.863525,-1.679935,0.766343  
C,3.201395,-1.344577,0.947104  
C,3.184822,-0.151822,-1.164689  
C,3.859326,-0.575359,-0.016814  
C,-3.480185,-1.876407,1.240733  
C,-2.988533,-2.813828,-0.933185  
C,-4.336065,-3.125365,-1.099248  
C,-5.259851,-2.815878,-0.097648  
C,-4.826452,-2.194099,1.075399  
H,-0.608599,-1.565037,-1.597497  
H,-0.809839,-1.69294,1.458252  
H,1.313997,-0.142932,-2.214594  
H,1.36616,-2.305629,1.496822  
H,3.73636,-1.681711,1.824751  
H,3.70092,0.442514,-1.90637  
H,-3.146814,-1.385288,2.147861

C,2.80373,-1.247796,1.180067  
C,2.454989,-2.337976,-0.948643  
C,3.829789,-2.329812,-1.173967  
C,4.178836,-1.2467,0.956766  
C,4.696606,-1.783884,-0.223877  
C,-2.803631,-1.248011,-1.180081  
C,-2.454831,-2.338084,0.948674  
C,-3.829633,-2.329996,1.173992  
C,-4.69648,-1.78416,0.223876  
C,-4.178738,-1.24699,-0.956786  
H,0.174245,-1.697527,1.522249  
H,-0.17412,-1.697582,-1.522236  
H,2.402856,-0.821036,2.092436  
H,1.793095,-2.799834,-1.671039  
H,4.227311,-2.766393,-2.081638  
H,4.844786,-0.827158,1.700234  
H,5.765029,-1.785889,-0.398125  
H,-2.402778,-0.821262,-2.092465  
H,-1.792912,-2.799871,1.671092  
H,-4.227131,-2.766565,2.081678  
H,-5.764903,-1.786225,0.39812  
H,-4.84471,-0.82752,-1.700274  
Br,-0.000032,1.274446,-0.000003  
Br,-0.000143,3.611541,-0.000005

### Stilbene 14

C,0.006614,-1.574687,0.581264  
C,-0.887678,-1.80577,-0.41272  
C,-2.299121,-2.132756,-0.211757  
C,1.429212,-1.304499,0.37292  
C,2.138788,-0.55509,1.32768  
C,2.120676,-1.778708,-0.756361  
C,3.465617,-1.482839,-0.952657  
C,3.487025,-0.257475,1.158534  
C,4.125375,-0.725517,0.012703  
C,-3.225126,-1.829226,-1.224048  
C,-2.762034,-2.746112,0.965444  
C,-4.118317,-3.014101,1.135453  
C,-5.032389,-2.692594,0.128663  
C,-4.580356,-2.103138,-1.05399  
H,-0.342389,-1.565327,1.609951  
H,-0.553559,-1.723898,-1.443897  
H,1.62091,-0.191035,2.2071  
H,1.605477,-2.401667,-1.476548  
H,4.008082,-1.842826,-1.814212  
H,4.039162,0.322911,1.882614  
H,-2.87699,-1.363383,-2.138922

H,-2.272631,-3.093655,-1.6964  
H,-4.663678,-3.626224,-2.001549  
H,-6.305166,-3.065848,-0.226567  
H,-5.535737,-1.956965,1.858198  
C,5.318541,-0.285956,0.138915  
F,5.674356,0.863622,-0.480607  
F,5.672849,-0.172148,1.440698  
F,6.081924,-1.272664,-0.391561  
Br,-1.408239,1.291798,-0.016926  
Br,-1.940465,3.563228,0.024131

#### Stilbene 15

C,-0.323578,-1.568856,0.538876  
C,0.588671,-1.783142,-0.442897  
C,2.00013,-2.101759,-0.231377  
C,-1.742959,-1.294792,0.319327  
C,-2.661063,-1.585115,1.343558  
C,-2.231613,-0.748507,-0.881968  
C,-3.591927,-0.538397,-1.070104  
C,-4.024482,-1.372236,1.173367  
C,-4.495103,-0.850048,-0.040608  
C,2.706254,-2.762571,-1.250688  
C,2.679027,-1.777147,0.956817  
C,4.013585,-2.135054,1.127469  
C,4.700862,-2.806658,0.112239  
C,4.043382,-3.115778,-1.079761  
H,-0.012473,-1.675105,1.574123  
H,0.249807,-1.78715,-1.475519  
H,-2.297945,-1.992654,2.279892  
H,-1.540199,-0.466166,-1.665688  
H,-3.960458,-0.115135,-1.995558  
H,-4.723733,-1.603931,1.966225  
H,2.196211,-3.00647,-2.175809  
H,2.170085,-1.221369,1.734676  
H,4.524709,-1.874363,2.045644  
H,4.570676,-3.628471,-1.874223  
C,-5.899377,-0.625412,-0.22848  
N,-7.058584,-0.442183,-0.383875  
H,5.740701,-3.075946,0.246183  
Br,0.747525,1.340468,0.018534  
Br,1.193099,3.6291,-0.019889

#### Stilbene 17

C,-0.673216,-1.481388,0.498148  
C,0.239735,-1.422215,-0.503847  
C,1.687243,-1.343792,-0.315182  
C,-2.118445,-1.593167,0.311336

H,-2.055217,-3.035614,1.733525  
H,-4.461014,-3.490309,2.04544  
H,-6.084773,-2.908659,0.261102  
H,-5.282161,-1.857187,-1.840766  
N,5.549151,-0.420212,-0.179785  
O,6.119551,0.245395,0.700831  
O,6.095177,-0.845686,-1.211723  
Br,-1.053823,1.310622,0.000088  
Br,-1.500152,3.598403,-0.060274

#### Stilbene 16

C,-0.6832,-1.311392,-0.477622  
C,0.221404,-1.251326,0.53145  
C,1.672277,-1.196554,0.35578  
C,-2.131751,-1.404168,-0.301001  
C,-2.911564,-1.955266,-1.332891  
C,-2.781017,-0.959612,0.865792  
C,-4.155877,-1.09747,1.018825  
C,-4.290133,-2.093654,-1.205543  
C,-4.887221,-1.66338,-0.023914  
C,2.502164,-1.631556,1.403104  
C,2.272814,-0.71639,-0.82231  
C,3.655704,-0.715171,-0.964544  
C,4.462842,-1.166568,0.08447  
C,3.887367,-1.626966,1.270671  
H,-0.322698,-1.361532,-1.501102  
H,-0.133436,-1.314095,1.556419  
H,-2.426918,-2.288237,-2.243177  
H,-2.209839,-0.483142,1.65227  
H,-4.665913,-0.757731,1.907965  
H,-4.896564,-2.520431,-1.990458  
H,2.052894,-1.986351,2.323356  
H,1.656892,-0.321602,-1.620386  
H,4.111326,-0.3358,-1.869219  
H,4.517609,-1.963453,2.082508  
N,-6.341825,-1.80261,0.126451  
O,-6.973058,-2.30012,-0.821088  
O,-6.84974,-1.415854,1.19241  
C,5.947438,-1.220986,-0.095056  
F,6.336499,-2.391704,-0.655619  
F,6.392491,-0.230163,-0.902608  
F,6.602505,-1.110188,1.083871  
Br,-0.404168,1.828552,-0.011703  
Br,-0.549522,4.152296,-0.037667

#### Stilbene 18

C,-0.468428,-1.19594,0.519118  
C,0.43632,-1.212203,-0.491406  
C,1.888463,-1.247814,-0.31848  
C,-1.920919,-1.201859,0.345464

C,-2.900388,-2.131703,1.34841  
C,-2.762384,-1.180413,-0.870115  
C,-4.133701,-1.336625,-1.026478  
C,-4.274681,-2.287302,1.208352  
C,-4.896314,-1.89227,0.014182  
C,2.535173,-1.786944,-1.345521  
C,2.269479,-0.837055,0.861727  
C,3.649671,-0.811413,1.02565  
C,4.451427,-1.27519,-0.015821  
C,3.919267,-1.761235,-1.206882  
H,-0.320991,-1.514084,1.525367  
H,-0.104191,-1.50314,-1.531098  
H,-2.419555,-2.440391,2.269324  
H,-2.190399,-0.713192,-1.661731  
H,-4.623963,-1.014049,-1.935832  
H,-4.868059,-2.707839,2.009728  
H,2.100897,-2.165723,-2.263288  
H,1.639431,-0.440083,1.647426  
H,4.108676,-0.422451,1.922401  
H,4.578539,-2.104276,-1.990261  
C,-6.313799,-2.046599,-0.141731  
N,-7.483573,-2.175942,-0.27102  
N,5.911113,-1.241413,0.146333  
O,6.360586,-0.807926,1.22051  
O,6.604387,-1.650182,-0.800253  
Br,-0.421294,1.663292,-0.016133  
Br,-0.569774,3.986292,-0.027715

#### Stilbene 19

C,-0.901564,-1.453796,-0.472855  
C,0.000223,-1.336963,0.534018  
C,1.444302,-1.191325,0.354215  
C,-2.340714,-1.638298,-0.293971  
C,-3.086398,-2.229761,-1.32864  
C,-3.01374,-1.245504,0.877839  
C,-4.376129,-1.471517,1.027885  
C,-4.451799,-2.455374,-1.195594  
C,-5.101342,-2.078832,-0.010494  
C,2.303164,-1.575768,1.397867  
C,2.009933,-0.672182,-0.824567  
C,3.389599,-0.584497,-0.971297  
C,4.226669,-0.98676,0.074227  
C,3.685003,-1.484546,1.261216  
H,-0.540787,-1.480547,-1.497187  
H,-0.346883,-1.422856,1.559914  
H,-2.583701,-2.524205,-2.242534  
H,-2.472202,-0.739596,1.667045  
H,-4.888782,-1.164019,1.930093

C,-2.730215,-1.680757,1.389528  
C,-2.54332,-0.738503,-0.827843  
C,-3.925191,-0.795959,-0.969213  
C,-4.114625,-1.734806,1.258687  
C,-4.710816,-1.290021,0.07684  
C,2.685071,-1.765393,-1.353811  
C,2.521401,-0.792212,0.852258  
C,3.90164,-0.879451,0.99347  
C,4.673877,-1.414153,-0.042577  
C,4.068014,-1.849312,-1.223041  
H,-0.109605,-1.251231,1.543016  
H,0.076071,-1.269517,-1.514729  
H,-2.264937,-2.023377,2.306451  
H,-1.945737,-0.311298,-1.623118  
H,-4.397757,-0.429302,-1.870433  
H,-4.728698,-2.104723,2.068375  
H,2.211032,-2.111581,-2.264895  
H,1.933976,-0.344802,1.644009  
H,4.381424,-0.5298,1.897721  
H,4.671446,-2.258871,-2.021576  
C,-6.19167,-1.407187,-0.101803  
F,-6.849946,-1.333766,1.078424  
F,-6.68059,-0.430584,-0.901445  
F,-6.530952,-2.589411,-0.670888  
C,6.164714,-1.432389,0.082422  
F,6.558003,-1.620557,1.364165  
F,6.721162,-2.416515,-0.661762  
F,6.713738,-0.264862,-0.331001  
Br,0.020273,1.897572,0.001718  
Br,0.047846,4.2271,-0.007431

#### Stilbene 20

C,0.451282,-1.423102,-0.506407  
C,-0.451256,-1.423103,0.506416  
C,-1.902326,-1.444715,0.327592  
C,1.902352,-1.444704,-0.327584  
C,2.728758,-0.899527,-1.326213  
C,2.505218,-2.000491,0.815556  
C,3.885951,-1.97976,0.980271  
C,4.112402,-0.877714,-1.186773  
C,4.665704,-1.416356,-0.027694  
C,-2.728737,-0.899538,1.326217  
C,-2.505188,-2.000514,-0.815545  
C,-3.88592,-1.979792,-0.980263  
C,-4.665678,-1.416386,0.027696  
C,-4.112382,-0.877733,1.186773  
H,0.091176,-1.375172,-1.530412  
H,-0.091151,-1.375165,1.530421  
H,2.277597,-0.476834,-2.216096  
H,1.889586,-2.472292,1.570988  
H,4.362096,-2.405312,1.851095

H,-5.016747,-2.916203,-1.995366  
H,1.879935,-1.959782,2.318746  
H,1.367851,-0.314942,-1.619701  
H,3.817712,-0.175561,-1.876521  
H,4.337647,-1.782687,2.070331  
C,-6.509969,-2.305292,0.138415  
N,-7.67216,-2.494159,0.26186  
C,5.711142,-0.948191,-0.110083  
F,6.091043,0.069968,-0.91692  
F,6.361982,-0.799065,1.066979  
F,6.170592,-2.091322,-0.674353  
Br,-0.818904,1.691213,0.004886  
Br,-1.106575,4.002356,-0.009979

### Stilbene 21

C,0.5413598399,0.4089360165,0.0674233167  
C,-0.5414239362,-0.4089713728,0.0674233167  
C,-0.4896784253,-1.8695170092,0.0501769532  
C,0.489614329,1.8694816529,0.0501769533  
C,1.5960435039,2.5854899398,-0.4395912017  
C,-0.6283593186,2.5918140329,0.5073699839  
C,-0.657004594,3.9789868051,0.4407063804  
C,1.5842088772,3.9740977734,-0.5054491954  
C,0.45140748,4.6764082275,-0.0674171347  
C,-1.5961076002,-2.5855252961,-0.4395912018  
C,0.6282952223,-2.5918493892,0.5073699839  
C,0.6569404977,-3.9790221614,0.4407063803  
C,-0.4514715763,-4.6764435838,-0.0674171348  
C,-1.5842729735,-3.9741331297,-0.5054491955  
H,1.5316908948,-0.0340126639,0.0102565825  
H,-1.5317549911,0.0339773076,0.0102565825  
H,2.4695178627,2.0426366071,-0.7815666083  
H,-1.4707501253,2.0662394097,0.9389431595  
H,-1.5180899625,4.5292778757,0.7971332218  
H,2.4382729347,4.5168518877,-0.889033544  
H,-2.469581959,-2.0426719634,-0.7815666084  
H,1.470686029,-2.066274766,0.9389431595  
H,1.5180258662,-4.529313232,0.7971332217  
H,-2.438337031,-4.516887244,-0.8890335441  
C,0.4276617812,6.1093024656,-0.1291560686  
N,0.4074722019,7.2918682362,-0.1820989122  
C,-0.4277258775,-6.1093378219,-0.1291560687  
N,-0.4075362982,-7.2919035925,-0.1820989124  
Br,-0.0000320482,-0.0000176782,3.1831385277  
Br,-0.0000320482,-0.0000176782,5.5114676271

### Stilbazole 23

C,-0.339114,-1.646418,0.577402  
C,0.605324,-1.743043,-0.390918  
C,2.034621,-1.943156,-0.145811

H,4.756308,-0.455652,-1.943911  
H,-2.277581,-0.476836,2.216098  
H,-1.889551,-2.472314,-1.570974  
H,-4.362061,-2.405355,-1.851083  
H,-4.756291,-0.455666,1.943906  
N,6.125977,-1.401608,0.133291  
O,6.800567,-0.905158,-0.784413  
O,6.594368,-1.885623,1.177464  
N,-6.125951,-1.401647,-0.133291  
O,-6.594341,-1.885727,-1.177434  
O,-6.800541,-0.905137,0.78438  
Br,-0.000012,1.681077,-0.000004  
Br,-0.00004,4.008842,-0.000003

### Stilbazole 22

C,-0.177441,-1.557495,0.663662  
C,0.711111,-1.744407,-0.344315  
C,2.12417,-2.078871,-0.160017  
C,-1.603126,-1.286266,0.498287  
C,-2.31029,-0.653262,1.538109  
C,-2.312733,-1.647772,-0.656103  
C,-3.668859,-1.354989,-0.797211  
C,-3.659583,-0.359807,1.413232  
C,-4.34797,-0.706352,0.242035  
C,2.825021,-2.737613,-1.179709  
C,2.846293,-1.763556,1.001104  
C,4.182573,-2.141493,1.096657  
N,4.856787,-2.787736,0.126422  
C,4.165551,-3.068202,-0.99226  
H,0.182147,-1.603769,1.688241  
H,0.358205,-1.711917,-1.371165  
H,-1.785647,-0.373675,2.444628  
H,-1.809616,-2.182304,-1.45275  
H,-4.181749,-1.655452,-1.699183  
H,-4.206921,0.134675,2.20475  
H,2.327507,-2.996847,-2.106577  
H,2.385736,-1.21459,1.812229  
H,4.751311,-1.905469,1.989085  
H,4.715422,-3.581944,-1.772927  
O,-5.674228,-0.374367,0.222322  
C,-6.39921,-0.702733,-0.958543  
H,-7.410888,-0.350279,-0.785546  
H,-5.980463,-0.201036,-1.832661  
H,-6.411556,-1.780597,-1.129947  
Br,0.848613,1.321371,-0.066503  
Br,1.271667,3.61432,-0.186105



C,-1.775663,-1.500921,0.346899  
C,-2.579859,-0.94819,1.356942  
C,-2.395605,-1.915141,-0.844456  
C,-3.763278,-1.736831,-1.028611  
C,-3.94811,-0.776349,1.166086  
C,-4.564608,-1.168434,-0.02861  
C,2.837566,-2.528339,-1.13456  
C,2.672221,-1.567213,1.046248  
C,4.032751,-1.818458,1.199871  
N,4.806054,-2.393909,0.259511  
C,4.193766,-2.732719,-0.888657  
H,-0.023086,-1.669169,1.616962  
H,0.296024,-1.734343,-1.432136  
H,-2.121736,-0.635427,2.288622  
H,-1.810681,-2.395122,-1.61967  
H,-4.223504,-2.069713,-1.952264  
H,-4.547904,-0.34296,1.958466  
H,2.407307,-2.828449,-2.082492  
H,2.127002,-1.067674,1.83655  
H,4.537567,-1.534486,2.116434  
H,4.82305,-3.188862,-1.644699  
C,-6.036785,-0.949458,-0.249789  
H,-6.582593,-0.973809,0.692499  
H,-6.22528,0.019671,-0.715813  
H,-6.453208,-1.715549,-0.90274  
Br,0.437876,1.335331,-0.074482  
Br,0.656768,3.657276,-0.150332

**Table S5:** Cartesian coordinates for the intermediates of the electrophilic bromination of selected stilbenes calculated using different DFT methods within the 6-31G(d,p) basis.

### Stilbene 2

#### M06/6-31G(d,p)

C,-0.6950893592,-0.0185926775,0.6508010768  
C,0.398885243,-0.819486177,1.2212197018  
C,0.4494878261,-2.225711526,0.7309580071  
C,-0.6786378773,1.320617524,0.3163753212  
C,-1.8502681338,1.9037735481,-0.2657481799  
C,0.4520920509,2.1639944497,0.5448566635  
C,0.4248350197,3.4881360737,0.2132010735  
C,-1.8833361427,3.2199115251,-0.6110780269  
C,-0.7459989935,4.0331924835,-0.3764548017  
C,1.5712417047,-2.6516712131,0.0205322007  
C,-0.6186270294,-3.1092839133,0.9180639209  
C,-0.5594156465,-4.388391378,0.3947596435  
C,0.5603096952,-4.8259493003,-0.3246110099  
C,1.6207189083,-3.9370812407,-0.5024322489  
H,-1.6223202433,-0.5711492187,0.4801294391  
H,1.3768182433,-0.3364731123,1.1567078433  
H,-2.719501756,1.2722577524,-0.4358229911  
H,1.3436464349,1.7555884921,1.0138952922

#### M06-L/6-31G(d,p)

C,-0.7590196667,-0.0323410612,0.8508985066  
C,0.3248061141,-0.8337345813,1.432461981  
C,0.4104048973,-2.2015948667,0.8461225784  
C,-0.7142783988,1.2893471416,0.4360932298  
C,-1.8893663217,1.876179062,-0.136213041  
C,0.4506333494,2.1075081759,0.5649899461  
C,0.4487064813,3.4129316474,0.1555667713  
C,-1.8996140559,3.174431023,-0.5541998336  
C,-0.729601992,3.96328502,-0.4135308407  
C,1.5458033701,-2.5543305337,0.111261875  
C,-0.6458175624,-3.1160705698,0.9566325757  
C,-0.5589140808,-4.3546795142,0.3452975379  
C,0.5759812134,-4.7209442477,-0.3960731448  
C,1.6228945301,-3.7985982828,-0.500665524  
H,-1.7017123102,-0.56734888,0.7265588544  
H,1.2931718249,-0.3323454417,1.4338221751  
H,-2.782187134,1.2655145345,-0.2358072089  
H,1.3524002996,1.6958471544,1.0074102589

H,1.2883064628,4.1162122693,0.4045735728  
H,-2.7566073909,3.6834371142,-1.0594270388  
H,2.4114748061,-1.9748998221,-0.1280588785  
H,-1.4819461272,-2.8042643404,1.5089690369  
H,-1.390113136,-5.0739372715,0.5517846483  
H,2.5008335768,-4.2594737282,-1.0549887808  
O,-0.8705802467,5.2870200638,-0.7344075665  
C,0.2038062817,6.2154900467,-0.5452093329  
H,-0.1625246909,7.1671149818,-0.9266616774  
H,0.4439951331,6.3113088866,0.5183592609  
H,1.0847901936,5.9031716474,-1.1147318322  
C,0.6208178081,-6.2222092586,-0.8580309105  
H,-0.3404140477,-6.5305798918,-1.282324498  
H,1.387145754,-6.3278924892,-1.6312184781  
H,0.8602246739,-6.9334422196,-0.0579735988  
Br,-0.1300012487,-0.6773707785,3.1433783908

#### M06-HF/6-31G(d,p)

C,-0.1801069247,-0.0479036268,0.5814967325  
C,0.7594918468,0.4657694889,-0.4573014342  
C,2.1427722345,-0.1200721554,-0.3168340426  
C,-1.5220352267,-0.2926415252,0.4398984834  
C,-2.2510713372,-0.8457656725,1.5549998184  
C,-2.242123771,0.0098922671,-0.7683028806  
C,-3.5772453071,-0.2338406694,-0.8730505875  
C,-3.5786820062,-1.1083314188,1.4604629209  
C,-4.2622789482,-0.8082574145,0.2430200645  
C,2.5420326725,-1.0893470829,-1.2332094163  
C,2.9867682643,0.2287672051,0.7402437088  
C,4.216173706,-0.3993894083,0.8726972237  
C,4.6314582002,-1.3785398189,-0.038493064  
C,3.7791139498,-1.7125159185,-1.0898779826  
H,0.2853741287,-0.2358244951,1.5451773184  
H,0.3865471501,0.3644391882,-1.469515419  
H,-1.7160292959,-1.0613890628,2.4716499621  
H,-1.7241833936,0.4718900666,-1.5984649586  
H,-4.111766436,0.0110119345,-1.7786498522  
H,-4.1559167078,-1.5319910448,2.2700234712  
H,1.8962894597,-1.3624116681,-2.0596365271  
H,2.6964596051,1.0106442984,1.4325623434  
H,4.8725493803,-0.1195953749,1.6876250021  
H,4.0838809037,-2.4621433909,-1.8091280785  
O,-5.5294200799,-1.0844963481,0.2339569058  
C,-6.3554328812,-0.8361512436,-0.9178450586  
H,-7.3442099664,-1.1717197354,-0.6281931678  
H,-6.3629543888,0.2306096332,-1.1366580823  
H,-5.986589877,-1.4167881892,-1.7620462713  
C,5.9945732176,-2.0278901378,0.1050226204  
H,6.1897496049,-2.2740580902,1.1485668988  
H,6.0527846872,-2.9383415601,-0.4890034602  
H,6.7681938219,-1.3383977492,-0.2370951566

H,1.3384720694,4.0208334915,0.2676587701  
H,-2.7783554645,3.6341144923,-0.9916137069  
H,2.3723642927,-1.8533500918,0.0197841942  
H,-1.5156427744,-2.8645444141,1.5604560551  
H,-1.3772891556,-5.0623974868,0.4480903546  
H,2.5127455889,-4.0644322788,-1.0647220871  
O,-0.8334222161,5.2051384561,-0.8403122492  
C,0.2922216632,6.0950312753,-0.7399970883  
H,-0.0526498945,7.038889884,-1.1534969916  
H,0.5807835486,6.2283546011,0.3053517821  
H,1.1323058558,5.7150850941,-1.3262820736  
C,0.6691914133,-6.0719283925,-1.0272321584  
H,-0.2777520811,-6.3693289327,-1.4852844073  
H,1.4482056572,-6.1123270616,-1.7908756791  
H,0.9078605487,-6.8349399996,-0.2781253721  
Br,-0.2692818625,-0.8238871154,3.3453592025

#### B3LYP/6-31G(d,p)

C,-0.7811252802,-0.0202413779,0.8750275602  
C,0.2975723599,-0.8513342867,1.4449210795  
C,0.3869681568,-2.2220293527,0.8504306179  
C,-0.7221675211,1.3023716803,0.4618809614  
C,-1.9090762757,1.9091720989,-0.0811017588  
C,0.4618436592,2.1088538497,0.5499171569  
C,0.4668248701,3.4142028903,0.1338257853  
C,-1.9128439223,3.2081123208,-0.5022964574  
C,-0.7243807505,3.9847164476,-0.4004798736  
C,1.5576708624,-2.5848705106,0.1711018307  
C,-0.6820523476,-3.1321002583,0.9015855387  
C,-0.5755992737,-4.3689214752,0.2806824432  
C,0.5924092319,-4.741491504,-0.4081695552  
C,1.6536122952,-3.8272603029,-0.4504308755  
H,-1.7311367012,-0.5365212043,0.755517238  
H,1.2672211411,-0.3609374365,1.4755299753  
H,-2.8144930942,1.3143896005,-0.1530471418  
H,1.3730067466,1.6873906733,0.9589678877  
H,1.3701002219,4.0053944547,0.2130660351  
H,-2.7980593162,3.6791428421,-0.9138226495  
H,2.3974486496,-1.896475242,0.1254999919  
H,-1.5790611978,-2.8870804371,1.4633468804  
H,-1.4061468989,-5.0666158145,0.3374293139  
H,2.5687914087,-4.0932282302,-0.970923098  
O,-0.8251192419,5.2266271939,-0.8273802081  
C,0.3001860368,6.1329410121,-0.779360462  
H,-0.0747626911,7.068892224,-1.1877591998  
H,0.626520028,6.2789323421,0.2533493108  
H,1.1185871406,5.7557245998,-1.3976483782  
C,0.7055597051,-6.0994020621,-1.0510308252  
H,-0.2315687806,-6.3916340751,-1.5336988095  
H,1.5011828638,-6.1255401799,-1.799308228  
H,0.9337540439,-6.8644157499,-0.2991205914

Br,0.6829987144,2.3907917191,-0.0364580347

Br,-0.3176183821,-0.8533974295,3.3828837469

**B97-D/6-31G(d,p)**

C,-0.7178447429,-0.0154831938,0.7328850144  
C,0.4106965724,-0.8347381456,1.2072207164  
C,0.4560261044,-2.2358616512,0.7156657546  
C,-0.6998311529,1.3378651008,0.3840584071  
C,-1.9144823797,1.9413162368,-0.1066192195  
C,0.47149037,2.1652809438,0.4970459997  
C,0.4401260887,3.4974355914,0.1429926648  
C,-1.9548847491,3.2668624032,-0.4702333367  
C,-0.7769157853,4.0670524366,-0.3502362064  
C,1.6514157566,-2.7118702545,0.1388405982  
C,-0.6736439867,-3.084755155,0.7680466609  
C,-0.6043996331,-4.3724322192,0.2408036542  
C,0.5862941547,-4.8554640831,-0.3523614471  
C,1.7088750276,-4.0038616851,-0.3934119325  
H,-1.6614185423,-0.552812654,0.617774392  
H,1.3853425547,-0.3427694459,1.1685744937  
H,-2.8100865618,1.3252878495,-0.1899526948  
H,1.3973016916,1.7448380992,0.8851503071  
H,1.332874959,4.1095893086,0.2425234366  
H,-2.862788004,3.735054327,-0.8459428424  
H,2.5307495358,-2.0666394934,0.1014337667  
H,-1.5848408379,-2.7447206705,1.2620750036  
H,-1.4763718791,-5.0253572765,0.2937026766  
H,2.6356792915,-4.3622619869,-0.8422081348  
O,-0.9150738659,5.3343763523,-0.7200877609  
C,0.2137932671,6.2506272833,-0.6365183696  
H,-0.1741190754,7.2071429636,-0.9966959681  
H,0.5485573434,6.3374144078,0.4064110504  
H,1.030878264,5.8976274729,-1.2807959314  
C,0.6541221677,-6.2626755022,-0.894621411  
H,-0.2645562117,-6.521551851,-1.4407103646  
H,1.5140793176,-6.3949541892,-1.5642565849  
H,0.7553522484,-6.9856734956,-0.0686045293  
Br,-0.1383495607,-0.6905205229,3.2274373791

**Stilbene 7**

**M06/6-31G(d,p)**

C,-0.5412365679,-0.0943016191,0.5036981651  
C,0.4512543674,0.3788650241,-0.4662267332  
C,1.8332863016,-0.1319738981,-0.2746748636  
C,-1.8837188777,-0.3799337114,0.28000235  
C,-2.6545509875,-0.8808820718,1.3663248919  
C,-2.5188247755,-0.1964029123,-0.9822619836  
C,-3.8429538531,-0.5088098453,-1.1347709087  
C,-3.979008685,-1.2012230831,1.1954324131  
C,-4.598113015,-1.0196168853,-0.0540346275  
C,2.4395745518,-0.8308857189,-1.3181967987  
C,2.5186272055,0.0248623584,0.9353694848

**M06-L/6-31G(d,p)**

C,-0.3276258002,0.6286148353,0.7681841004  
C,0.274152039,-0.622024993,1.2341966959  
C,-0.3562346711,-1.8673136641,0.7349522405  
C,0.3243717477,1.81030237,0.4118928835  
C,-0.4610864904,2.9013902532,-0.0585016407  
C,1.7376682868,1.9748653236,0.493135241  
C,2.3165329477,3.1608122063,0.1182219282  
C,0.1337939006,4.0817545521,-0.4382548392  
C,1.5318589154,4.2377434841,-0.3590409757  
C,0.4351849141,-2.8007356782,0.0597138875  
C,-1.7307636181,-2.1059982632,0.8745532355

C,3.7795954216,-0.5204433883,1.0918262185  
C,4.3956511352,-1.2319015674,0.0531604283  
C,3.7053214268,-1.3763727867,-1.1504215122  
H,-0.1555450595,-0.2443467021,1.5153264644  
H,0.1263599804,0.3136237689,-1.5069434206  
H,-2.1756116766,-1.0159386637,2.3339694009  
H,-1.9595838939,0.210501578,-1.8208687129  
H,-4.3323728482,-0.364689039,-2.0951461159  
H,-4.560790487,-1.5936386031,2.0253316515  
H,1.9191743173,-0.9537844917,-2.2668152217  
H,2.0787461928,0.6101139633,1.7426220722  
H,4.311641757,-0.3876566749,2.0319773241  
H,4.1692328076,-1.9204773511,-1.9703327874  
C,-6.0363485168,-1.3354364017,-0.2475131877  
H,-6.4552721591,-1.8987458773,0.5892213176  
H,-6.6105922188,-0.4044908563,-0.3499659208  
H,-6.1951865039,-1.8983845019,-1.1740615067  
C,5.7700561984,-1.7933679563,0.2333431289  
H,6.521314587,-0.9944367413,0.2161807813  
H,5.8692481011,-2.3029850109,1.1977405149  
H,6.0252967996,-2.5039114955,-0.5576853233  
Br,0.2388729746,2.3116831622,0.0377320173

#### M06-HF/6-31G(d,p)

C,-0.514751,0.079478,0.520744  
C,0.514751,0.079478,-0.520743  
C,1.920083,-0.231098,-0.28885  
C,-1.920083,-0.231098,0.28885  
C,-2.650043,-0.731225,1.372004  
C,-2.537101,-0.087317,-0.966831  
C,-3.854033,-0.466978,-1.12384  
C,-3.972684,-1.120661,1.196519  
C,-4.590312,-0.99645,-0.047677  
C,2.650042,-0.731227,-1.372003  
C,2.537101,-0.087314,0.96683  
C,3.854034,-0.466975,1.12384  
C,4.590312,-0.99645,0.047678  
C,3.972684,-1.120663,-1.196517  
H,-0.156363,-0.037067,1.537337  
H,0.156363,-0.037068,-1.537337  
H,-2.183882,-0.828383,2.34516  
H,-2.006304,0.354926,-1.801769  
H,-4.335525,-0.349616,-2.086659  
H,-4.528836,-1.517925,2.035309  
H,2.183881,-0.828386,-2.345159  
H,2.006305,0.354931,1.801767  
H,4.335526,-0.349611,2.086658  
H,4.528836,-1.517929,-2.035307  
C,-6.031719,-1.410164,-0.257131  
H,-6.476355,-1.756367,0.673371  
H,-6.608234,-0.564028,-0.633247

C,-2.2940394941,-3.2513851585,0.3413057409  
C,-1.5110945389,-4.1931491713,-0.3470563406  
C,-0.1404166923,-3.9455153451,-0.4760800616  
H,-1.4141382565,0.6040586828,0.6695032556  
H,1.3623627898,-0.6489935201,1.177184262  
H,-1.540113291,2.7859430713,-0.1155128501  
H,2.3594739006,1.1677767754,0.8680023548  
H,3.392977823,3.2855165279,0.1885298916  
H,-0.4722247786,4.9073066236,-0.7981734477  
H,1.5033466355,-2.6289034393,-0.0500209087  
H,-2.3464625212,-1.4102663657,1.4419739641  
H,-3.358135049,-3.4340410994,0.4651201711  
H,0.4839985118,-4.6644951588,-0.9991006647  
C,2.1836090309,5.5025714592,-0.7808993336  
H,1.4720896574,6.3215730239,-0.889971981  
H,2.9698770282,5.8005728215,-0.081962795  
H,2.6780995489,5.3625702727,-1.7502690485  
C,-2.1289945831,-5.436722148,-0.8977944512  
H,-3.067600478,-5.2234464823,-1.4164249405  
H,-1.462146199,-5.9501517839,-1.5926579165  
H,-2.3698236309,-6.1404322247,-0.0936148752  
Br,-0.140888306,-0.2273420878,3.1782524599

#### B3LYP/6-31G(d,p)

C,-0.3804131241,0.6713697463,0.7655517355  
C,0.1715027151,-0.5922836705,1.2753326128  
C,-0.4332704798,-1.8496134901,0.7616565145  
C,0.3108662608,1.8350538295,0.4120969002  
C,-0.4449202394,2.9393794193,-0.089779932  
C,1.7305848401,1.9741753052,0.5119284045  
C,2.3398185753,3.1452898,0.1279904353  
C,0.1811635248,4.1053905677,-0.4747596304  
C,1.5831438955,4.2341734996,-0.3750455578  
C,0.4150619505,-2.8217768477,0.213366096  
C,-1.8208767019,-2.0760583873,0.7625058757  
C,-2.3369349399,-3.2412047109,0.2147068378  
C,-1.4953877731,-4.2182908605,-0.3485449761  
C,-0.1136753532,-3.9857251366,-0.3380315897  
H,-1.4578800232,0.6709280823,0.617187407  
H,1.2567340135,-0.6330646193,1.3091776293  
H,-1.524551407,2.849379709,-0.1652151812  
H,2.3339094401,1.1610050284,0.8993917731  
H,3.4173929105,3.2458580159,0.2106016151  
H,-0.4041367508,4.9361579528,-0.8546908009  
H,1.4908285673,-2.667971431,0.2111613011  
H,-2.4926728524,-1.3612796907,1.2297873488  
H,-3.4101035394,-3.4076230091,0.2303554609  
H,0.5573293131,-4.7268953676,-0.7614329332  
C,2.2737436628,5.4899302376,-0.8068560578  
H,1.5755256732,6.317802827,-0.9405055444  
H,3.0448118558,5.78360731,-0.0878006968

H,-6.079809,-2.213729,-0.993676  
C,6.031719,-1.410164,0.257132  
H,6.608232,-0.564034,0.633263  
H,6.079806,-2.213741,0.993666  
H,6.476359,-1.756355,-0.673372  
Br,-0.000000164,2.097067,-0.000001

H,2.7844303311,5.3212850609,-1.7645406615  
C,-2.0697318154,-5.4900148709,-0.9155868782  
H,-2.35695069,-6.1760183507,-0.1097324594  
H,-2.9696738064,-5.2919676856,-1.5053587163  
H,-1.3488594643,-6.0094644837,-1.5508952494  
Br,-0.3691992903,-0.1490780799,3.2153641594

### **B97-D/6-31G(d,p)**

C,-0.3355921251,0.6735103389,0.7821030979  
C,0.2786261766,-0.6527178103,0.8258601742  
C,-0.3761012396,-1.882186218,0.4795910907  
C,0.3459166247,1.8930989514,0.4529949727  
C,-0.4475658453,3.0354329345,0.1504267957  
C,1.7648294612,2.0089321316,0.3984209286  
C,2.3512804687,3.2136197937,0.0367691237  
C,0.1523752064,4.2356529959,-0.2176026004  
C,1.5602191343,4.3485689944,-0.2831354654  
C,0.4375205966,-3.0319495994,0.2742803174  
C,-1.7863735195,-2.001207003,0.3162648321  
C,-2.3437480301,-3.2166210697,-0.0553417789  
C,-1.531158702,-4.3595119089,-0.2783345844  
C,-0.1327915503,-4.2430998479,-0.1048796217  
H,-1.4230253868,0.7014903562,0.7022019016  
H,1.368938792,-0.6817600044,0.833149147  
H,-1.5345432318,2.9605799672,0.2050816086  
H,2.3995521062,1.1633954591,0.6600055083  
H,3.4375976612,3.2979303028,0.0021994771  
H,-0.4643050777,5.1027934989,-0.4530823315  
H,1.5168455915,-2.9542736124,0.4126058865  
H,-2.4388330662,-1.1491271738,0.5019745826  
H,-3.4240158978,-3.3031632961,-0.1733252782  
H,0.499590638,-5.1160327956,-0.2653749187  
C,2.2167603442,5.6379238571,-0.6972324898  
H,1.5255487451,6.4870226144,-0.6228404498  
H,3.1078079911,5.8417875395,-0.0862024854  
H,2.5544550778,5.5666866651,-1.7450612816  
C,-2.1543495173,-5.6611698409,-0.7052754727  
H,-3.0912094317,-5.8481329715,-0.1610124458  
H,-2.4079480938,-5.62095598,-1.7781819023  
H,-1.4721807564,-6.5069328436,-0.5516295837  
Br,-0.1165138654,0.042871274,3.0239684875

### **Stilbene 12**

#### **M06/6-31G(d,p)**

C,-0.5178558148,-0.445009119,0.929650307  
C,0.5566737787,0.4398211712,0.4767034098  
C,0.4794308296,1.806960692,0.1883314127  
C,-0.4783466834,-1.8533166579,0.4596177182  
C,-1.6014574136,-2.3585005953,-0.196831075  
C,0.6585161007,-2.6529843164,0.6151776958

#### **M06-L/6-31G(d,p)**

C,-0.535358002,-0.4491988116,0.8735435598  
C,0.5622837665,0.4438688832,0.5030581754  
C,0.4902508687,1.8187800859,0.2102574335  
C,-0.4945447231,-1.8557028715,0.4278062058  
C,-1.6480142635,-2.404244155,-0.1425129843  
C,0.6721055435,-2.6263056174,0.5234881746

C,0.6705371305,-3.9405674328,0.103043735  
C,-1.5831847247,-3.6492203746,-0.7110610524  
C,-0.4481515725,-4.4378383738,-0.5639723026  
C,1.6493926163,2.4453156808,-0.3025131909  
C,-0.7137997455,2.5621396441,0.3463792091  
C,-0.7271758737,3.8961104618,0.0126890891  
C,0.4359993751,4.5011333532,-0.4849436668  
C,1.6220029049,3.7805471656,-0.6438052266  
H,-1.5180992311,-0.0104800799,0.8758313959  
H,1.5211018497,-0.052100396,0.3259574089  
H,-2.4909814417,-1.7409375585,-0.3091873739  
H,1.5180929917,-2.2838566583,1.1738805695  
H,1.5495464323,-4.5653735437,0.2328359907  
H,-2.4587162009,-4.0397313522,-1.2215391019  
H,-0.4352825527,-5.4490518383,-0.9610029123  
H,2.5625510638,1.8643397066,-0.4132904415  
H,-1.609715225,2.0949968906,0.7471073184  
H,-1.6323352168,4.4827750487,0.1342457111  
H,0.4136517779,5.5556164399,-0.7489369155  
H,2.5114953409,4.2699287115,-1.0274522325  
Br,0.0688615043,-0.2207746692,2.8420845206

#### **M06-HF/6-31G(d,p)**

C,-0.5771130315,-0.4504459597,0.6149824518  
C,0.5773128314,0.4504417381,0.6149811216  
C,0.5049492519,1.8785816267,0.3032313352  
C,-0.5047474912,-1.8785864114,0.3032321856  
C,-1.6503219951,-2.4634277873,-0.2473437996  
C,0.6629064227,-2.6354333373,0.4915957753  
C,0.6810462509,-3.9628893795,0.1026812981  
C,-1.6196961527,-3.7954794829,-0.6462473578  
C,-0.4572312898,-4.5395651926,-0.4727266025  
C,1.6505284531,2.4634242455,-0.2473341021  
C,-0.6627066875,2.6354280337,0.4915855495  
C,-0.6808435816,3.9628844549,0.1026725382  
C,0.4574389363,4.5395613357,-0.4727246166  
C,1.6199056874,3.7954763499,-0.6462362055  
H,-1.5445640024,0.0236499544,0.4911724129  
H,1.5447636056,-0.0236553997,0.4911737484  
H,-2.5536454517,-1.8795474685,-0.3756475986  
H,1.5330365129,-2.2065213832,0.9748435263  
H,1.5722079381,-4.5566394055,0.2515706743  
H,-2.4989690397,-4.2483117347,-1.0826365569  
H,-0.4341018874,-5.5778728754,-0.7755634799  
H,2.5538531548,1.8795442702,-0.3756306951  
H,-1.5328411385,2.2065152267,0.9748245882  
H,-1.5720068051,4.5566340141,0.2515545218  
H,0.4343117544,5.5778693732,-0.7755604797  
H,2.499182157,4.2483095662,-1.0826171894  
Br,0.0000975978,-0.000023714,2.6191669566

C,0.6846886859,-3.9241110976,0.0363773241  
C,-1.6278384646,-3.7044265386,-0.6356083843  
C,-0.4635518647,-4.4620983903,-0.548567576  
C,1.6763581818,2.4656566656,-0.2272228431  
C,-0.7146371762,2.5645690431,0.3036141198  
C,-0.7244363183,3.8988981068,-0.0413908431  
C,0.4551345606,4.5152099425,-0.4853399906  
C,1.6530392038,3.800817146,-0.5798337856  
H,-1.5293781096,-0.0049953314,0.8293545442  
H,1.5293182973,-0.0443944328,0.3742082437  
H,-2.5566936027,-1.8106778305,-0.2060167795  
H,1.5529554129,-2.2237601801,1.0202990444  
H,1.5846436785,-4.5241177607,0.1205285799  
H,-2.5229135791,-4.1259935356,-1.0804795841  
H,-0.4503142153,-5.4793103446,-0.9264494441  
H,2.5981555109,1.8937387451,-0.2895000559  
H,-1.6248090027,2.0925103213,0.6607419322  
H,-1.6405123811,4.4744594996,0.0308159228  
H,0.436637456,5.5665947293,-0.756455595  
H,2.5560609752,4.293010558,-0.9228927138  
Br,0.0841215614,-0.1888348287,2.807177319

#### **B3LYP/6-31G(d,p)**

C,-0.5602307169,-0.4677617306,0.6361818854  
C,0.5604419804,0.4677594014,0.6361459285  
C,0.4937115536,1.865764923,0.2895273611  
C,-0.4935045962,-1.8657722172,0.2895472427  
C,-1.7172509035,-2.5355344695,0.0597724421  
C,0.7215172106,-2.5740730991,0.1391212214  
C,0.7032060711,-3.9065708917,-0.240901297  
C,-1.7271257113,-3.8693428346,-0.3255270922  
C,-0.5180898773,-4.5547706104,-0.4746413445  
C,1.7174582119,2.5355373027,0.0597675892  
C,-0.7213145222,2.5740623794,0.1390970867  
C,-0.7030065371,3.9065628593,-0.2409123096  
C,0.5182894259,4.55477055,-0.4746352459  
C,1.7273290505,3.8693483632,-0.3255184505  
H,-1.550177545,-0.0243929878,0.5990122616  
H,1.5503882916,0.024388956,0.5989806498  
H,-2.6537754603,-1.9988064492,0.1814703792  
H,1.6747574413,-2.091524855,0.3275510056  
H,1.6352956607,-4.4490094115,-0.3563890458  
H,-2.66884523,-4.3756366907,-0.5070748008  
H,-0.5231374985,-5.5986024423,-0.7721527716  
H,2.653983905,1.9988120251,0.1814681408  
H,-1.6745535034,2.0915054946,0.3275097794  
H,-1.6350972322,4.4489984322,-0.3564044337  
H,0.5233340191,5.5986053325,-0.7721366621  
H,2.669046647,4.3756499783,-0.5070541346  
Br,0.0001018654,-0.0000253081,2.7671946148

**B97-D/6-31G(d,p)**

C,-0.5676907998,-0.4626128636,0.6269249937  
C,0.5678907344,0.4626086261,0.6269139947  
C,0.5002780813,1.862124054,0.287893995  
C,-0.5000764599,-1.8621295934,0.2879005349  
C,-1.7237013592,-2.5228920417,-0.012012706  
C,0.7225750523,-2.5861892601,0.2157635148  
C,0.7140726129,-3.9246967251,-0.1671536775  
C,-1.7224025163,-3.8622467665,-0.4026903864  
C,-0.5051241962,-4.5628504619,-0.4802424349  
C,1.723905841,2.5228879102,-0.0120086874  
C,-0.7223732846,2.5861850366,0.2157501887  
C,-0.7138674108,3.9246935235,-0.1671622352  
C,0.5053322777,4.5628478358,-0.4802396093  
C,1.722610227,3.8622436616,-0.4026814263  
H,-1.5588853246,-0.0099863524,0.5715750015  
H,1.5590846225,0.0099800844,0.5715681205  
H,-2.6617201153,-1.9703563868,0.0564573834  
H,1.6653792016,-2.1091761872,0.4800727779  
H,1.6486271762,-4.4813969041,-0.2206108584  
H,-2.6596582665,-4.3626548031,-0.641627629  
H,-0.5025982859,-5.6110268355,-0.7791521346  
H,2.6619237439,1.9703514696,0.0564662894  
H,-1.6651798629,2.1091713481,0.4800490567  
H,-1.6484212126,4.4813944088,-0.2206250101  
H,0.5028088241,5.6110252679,-0.7791456891  
H,2.6598676113,4.362652584,-0.641610302  
Br,0.0000950885,-0.0000086291,2.8086269352

**Stilbene 16**

**M06/6-31G(d,p)**

C,-0.5164252789,-0.9220059314,1.1007409222  
C,0.5121862515,0.0164671558,0.6452150509  
C,0.3667234679,1.3826885145,0.3688947433  
C,-0.4046618093,-2.3321867763,0.6338104796  
C,-1.4891163877,-2.8818257427,-0.051754789  
C,0.7619479385,-3.0796548931,0.8251141776  
C,0.8512088007,-4.3649581055,0.3179113314  
C,-1.4086886117,-4.1694982836,-0.564939669  
C,-0.2371089571,-4.8813623386,-0.3724048558  
C,1.4999156334,2.0798487843,-0.1289967282  
C,-0.8590326886,2.0764078558,0.5421591326  
C,-0.9454604179,3.410940746,0.2161926545  
C,0.1814245789,4.069696429,-0.2882430496  
C,1.4023928794,3.4115525755,-0.4628121558  
H,-1.5382383243,-0.5409415577,1.0483187022  
H,1.498181272,-0.4266399122,0.4818821231  
H,-2.4010477431,-2.3047608457,-0.1900092299  
H,1.5890355939,-2.6741222796,1.4057516365  
H,1.7363854952,-4.9784422475,0.4515080492  
H,-2.2314167494,-4.6286100091,-1.1033580825

**M06-L/6-31G(d,p)**

C,-0.5235160801,-0.9282691646,1.0771245898  
C,0.5223907603,0.0194853733,0.6844828031  
C,0.3772104624,1.3897853967,0.3974969865  
C,-0.4144302187,-2.3331582045,0.6158681602  
C,-1.5304616077,-2.917401305,0.0078930093  
C,0.7814129012,-3.0541432148,0.7365423431  
C,0.8684578342,-4.3429195731,0.2369086609  
C,-1.4513934497,-4.2084338785,-0.4997679655  
C,-0.2514363593,-4.8932530931,-0.3782600358  
C,1.5254616362,2.0987612891,-0.0485523638  
C,-0.8633482266,2.0719908753,0.4996260093  
C,-0.949081451,3.4037169322,0.15445116  
C,0.1935916912,4.077964403,-0.2973965516  
C,1.4298531857,3.4280625079,-0.3999381276  
H,-1.5401495324,-0.5378945042,1.0401876675  
H,1.5113149206,-0.4191078301,0.5423267052  
H,-2.4611889873,-2.3628467405,-0.074481729  
H,1.631510552,-2.6218417882,1.259893282  
H,1.7729068648,-4.934153259,0.3182022008  
H,-2.2946663651,-4.6917038738,-0.9789623464

H,2.4410194679,1.5485569582,-0.2525151131  
H,-1.7285869801,1.5672326484,0.9495067671  
H,-1.8737122498,3.9578959852,0.346379995  
H,2.2578061666,3.955927879,-0.853410552  
N,-0.1429642493,-6.2537024018,-0.9178230613  
O,-1.1161739741,-6.677694795,-1.5111904391  
O,0.901928  
7663,-6.8482854584,-0.7323355277  
C,0.1201955195,5.5345694792,-0.6656336833  
F,-1.0809434254,6.0496895142,-0.4424133631  
F,1.0187970932,6.2121947014,0.0416348739  
F,0.4149830233,5.6697993821,-1.9549068748  
Br,0.0757093985,-0.6675410301,2.997111777

#### **M06-HF/6-31G(d,p)**

C,-0.8599560487,0.395461518,-0.5704110747  
C,0.1299276084,0.4056827236,0.5095811852  
C,1.5549881924,0.1276030541,0.3345672551  
C,-2.2802851168,0.0456717844,-0.3543648164  
C,-2.9142763625,-0.6616936147,-1.378547453  
C,-2.9531569691,0.3543009497,0.8366174806  
C,-4.2584016416,-0.0714702609,1.0135104146  
C,-4.2237795527,-1.1015064255,-1.2065619558  
C,-4.8515937133,-0.7946739949,-0.0143506189  
C,2.2358858408,-0.3737525669,1.4480642426  
C,2.2128080042,0.2961040484,-0.8967778015  
C,3.54182851,-0.0623406625,-1.0075457142  
C,4.2064771812,-0.5852387492,0.1070807416  
C,3.5725405263,-0.7450068463,1.3295949799  
H,-0.4733706358,0.2354856446,-1.5707645998  
H,-0.2687175901,0.3011771312,1.513489841  
H,-2.3941955836,-0.8824296055,-2.3020865764  
H,-2.4835410251,0.9572526021,1.6047517959  
H,-4.8238720993,0.1458151426,1.9087932721  
H,-4.7531190244,-1.6596613335,-1.9661998673  
H,1.7272231192,-0.4887397217,2.3972603798  
H,1.7064964735,0.736366135,-1.7474654881  
H,4.0718676998,0.0584900911,-1.9432639704  
H,4.1125862224,-1.1500467838,2.1741675584  
N,-6.2429503272,-1.2513624645,0.1759913567  
O,-6.7399671796,-1.8703912874,-0.7295747052  
O,-6.7676663863,-0.9689285628,1.2231178558  
C,5.6749568929,-0.9349312507,-0.038355671  
F,5.8820792879,-1.6087728099,-1.1729470802  
F,6.4118719794,0.1774611654,-0.0815696262  
F,6.096546347,-1.6804724336,0.984299257  
Br,-0.4257686296,2.3846073843,-0.0997015973

#### **B97-D/6-31G(d,p)**

C,-0.5816610311,-0.9299951686,0.9860642015  
C,0.508221696,0.0283531998,0.7433668648

H,2.4768161036,1.5792087841,-0.1195056301  
H,-1.7473639991,1.5560625442,0.8612192132  
H,-1.8897196065,3.937212491,0.227093932  
H,2.2986006324,3.97435121,-0.752064384  
N,-0.1604178403,-6.2700444186,-0.9161246505  
O,-1.1680147104,-6.7250222107,-1.4440424757  
O,0.9165726952,-6.8416054538,-0.7920018984  
C,0.1269330925,5.5407133443,-0.6771908423  
F,-1.119275179,6.016247163,-0.6018605719  
F,0.9097873785,6.2544816857,0.1435311218  
F,0.5758036962,5.7047109389,-1.9289291058  
Br,0.1021027062,-0.6597204265,2.9856160756

#### **B3LYP/6-31G(d,p)**

C,-0.4546270752,-0.9340123646,1.132334406  
C,0.5687796933,0.0260798351,0.6938499696  
C,0.4020059903,1.3919143376,0.3869793258  
C,-0.3698923848,-2.3417435503,0.6500643328  
C,-1.5223122924,-2.9092705411,0.0864860107  
C,0.8227882182,-3.0829110109,0.7043486236  
C,0.8688004324,-4.3692048108,0.1828357999  
C,-1.4846372923,-4.1974539601,-0.4419668832  
C,-0.2871191343,-4.9005482519,-0.3870280929  
C,1.5453329147,2.1076613204,-0.0733279481  
C,-0.8488968309,2.0700069523,0.477819  
C,-0.9417774,3.3982434645,0.1174525013  
C,0.2016939414,4.0811793736,-0.3375743754  
C,1.4422607702,3.4383315368,-0.4373594994  
H,-1.4709140704,-0.5503775536,1.1474754925  
H,1.5578448749,-0.3978027173,0.5351323677  
H,-2.4511202813,-2.3477205225,0.0533860085  
H,1.7047858573,-2.6761532077,1.1897274446  
H,1.7701144698,-4.9683948621,0.215630467  
H,-2.357613374,-4.6598272496,-0.8853978594  
H,2.5015499358,1.5981260247,-0.1431820622  
H,-1.7332219653,1.5536979756,0.8335077436  
H,-1.8900462421,3.9202141072,0.1750603803  
H,2.306074734,3.9832787068,-0.7991178548  
N,-0.2384089327,-6.272593113,-0.9475918596  
O,-1.2747488282,-6.7125225161,-1.4332625743  
O,0.8359274676,-6.8608996128,-0.8849481677  
C,0.0855911865,5.559816992,-0.6764190424  
F,-1.0957665338,5.8186099058,-1.2584559499  
F,0.1683463012,6.2830459785,0.4525024555  
F,1.067110015,5.9461092935,-1.5035475032  
Br,0.2283593352,-0.6836439603,3.053972585



C,0.3801177995,1.4092916378,0.4421754384  
C,-0.4384291823,-2.3389958128,0.5601490205  
C,-1.5621658532,-2.9703109076,-0.0168844564  
C,0.7842989516,-3.0400503818,0.6788947257  
C,0.8903262817,-4.346442882,0.2034973094  
C,-1.4625494859,-4.2785967734,-0.5019944164  
C,-0.2359066807,-4.9413364258,-0.3864324886  
C,1.569496812,2.1246936396,0.0982419425  
C,-0.8753194744,2.0956515509,0.4386905014  
C,-0.9293643333,3.4354451713,0.0872842572  
C,0.2581664075,4.1200235429,-0.2675808179  
C,1.5053024631,3.4669703955,-0.2631608128  
H,-1.5935604337,-0.5343225395,0.8771428909  
H,1.5090594672,-0.4042607951,0.6800503758  
H,-2.5093325434,-2.4357016034,-0.0952054583  
H,1.6361435926,-2.5804265747,1.1802776144  
H,1.8143632843,-4.9137697797,0.2858008981  
H,-2.3092689198,-4.7871329896,-0.9569385505  
H,2.5283735532,1.6058880257,0.111799049  
H,-1.7885581057,1.5794564425,0.7288368595  
H,-1.8762050751,3.9720828312,0.0887272624  
H,2.4051657267,4.0149101773,-0.5333028577  
N,-0.1213084788,-6.3477371881,-0.9038611278  
O,-1.1366163386,-6.8470959402,-1.390401709  
O,0.980517235,-6.8898165386,-0.8029749862  
C,0.1428928657,5.5815670817,-0.7001640714  
F,-0.6569607559,6.2604400485,0.1545566945  
F,1.3455701105,6.1917673251,-0.7436850369  
F,-0.4140145597,5.6304610522,-1.9342090218  
Br,-0.110531495,-0.6197738204,3.0306251476

### Stilbene 18

#### M06/6-31G(d,p)

C,0.5189522524,-0.4858521098,1.1180805155  
C,-0.4921251645,0.4745494351,0.6750427057  
C,-0.3164713689,1.8364757327,0.3813153304  
C,0.3676771524,-1.8976398907,0.6813278858  
C,1.4439468336,-2.5037025675,0.0357496981  
C,-0.829915213,-2.6002856366,0.8581711238  
C,-0.9478357833,-3.8889688221,0.3720004897  
C,1.3229881621,-3.7990615018,-0.45484643  
C,0.1281016376,-4.4833626541,-0.2892829531  
C,-1.435664293,2.5527843887,-0.1169234828  
C,0.9257576091,2.5019432793,0.5355313844  
C,1.0417976419,3.8300013736,0.1904553139  
C,-0.0721831171,4.5088939257,-0.3144969287  
C,-1.3090820446,3.8774863266,-0.4705605135  
H,1.5491713381,-0.1294555176,1.0582165161  
H,-1.4896285407,0.0542259275,0.5229252839  
H,2.380666417,-1.9645835104,-0.0915848852  
H,-1.655934037,-2.1549564167,1.4110331999

#### M06-L/6-31G(d,p)

C,0.5232894519,-0.4922047512,1.0578644005  
C,-0.506918323,0.4842425619,0.703549272  
C,-0.3287199743,1.8516607987,0.4021224796  
C,0.3699345936,-1.8987050084,0.6377470835  
C,1.4791651429,-2.5501594068,0.0921013832  
C,-0.8567564621,-2.5714546566,0.7373881728  
C,-0.9702019616,-3.8705548726,0.2771392473  
C,1.3620766651,-3.8548233394,-0.3752476563  
C,0.1396398912,-4.5104215834,-0.2844026238  
C,-1.4656966686,2.5899251626,-0.0184267667  
C,0.9321447077,2.4965381657,0.4659819065  
C,1.0480968692,3.8233867122,0.1083027741  
C,-0.0849591595,4.5286500816,-0.3174669099  
C,-1.3409773381,3.9142701836,-0.3822753173  
H,1.5488551265,-0.127958511,1.0063655139  
H,-1.5101060434,0.0742223812,0.5803101768  
H,2.4346596455,-2.036626205,0.0258317798  
H,-1.7089336787,-2.0928370896,1.2153777262

H,-1.8692408236,-4.4492778027,0.5095117978  
H,2.1562736945,-4.2763694385,-0.9607895254  
H,-2.3901769495,2.0427086094,-0.2261470059  
H,1.7857891491,1.9774812039,0.9437455299  
H,1.9841119011,4.3556748897,0.3064071061  
H,-2.1545204644,4.4362451818,-0.8625901392  
C,-0.0529304933,-5.8833794371,-0.8115023244  
F,1.0515224222,-6.3435476979,-1.3926335006  
F,-0.3837269116,-6.7119218061,0.1796427877  
F,-1.0423186254,-5.9153613122,-1.7069635533  
C,0.020187766,5.9664736189,-0.7107775081  
F,1.2366825617,6.4549551398,-0.5098715129  
F,-0.288514446,6.095411398,-1.9978243396  
F,-0.8515005656,6.6759535481,-0.0003573051  
Br,-0.0676463133,-0.1713592918,3.0173804811

#### **M06-HF/6-31G(d,p)**

C,-0.4932253706,0.4736468264,0.5433822845  
C,0.4907967378,0.4673729964,-0.5412868161  
C,1.9136549432,0.1527264493,-0.353756838  
C,-1.9173402666,0.1640319984,0.3592195454  
C,-2.5756683627,-0.4236371867,1.4409864872  
C,-2.5870768561,0.3911675147,-0.8550411188  
C,-3.906274125,0.002734061,-0.9819960071  
C,-3.9031175042,-0.8255195037,1.3056915327  
C,-4.5489798328,-0.609961599,0.0993429666  
C,2.5683647992,-0.4529054341,-1.4281664689  
C,2.5840218058,0.3892622557,0.8578572083  
C,3.9007724692,-0.0069710597,0.9906591253  
C,4.5403433347,-0.6344631905,-0.0833264935  
C,3.8928830796,-0.8610735542,-1.2873581252  
H,-0.0950149389,0.3460365521,1.5442473853  
H,0.0923866383,0.3326020496,-1.5411359748  
H,-2.0594005813,-0.5808450711,2.3798813683  
H,-2.0991201918,0.9031728288,-1.6759606383  
H,-4.4476570456,0.1764289058,-1.9029755076  
H,-4.4271749278,-1.2916925472,2.1283393453  
H,2.0506707307,-0.6202544334,-2.3645107568  
H,2.098302808,0.9118060488,1.6734705772  
H,4.4402971056,0.1663378798,1.9126239058  
H,4.4128863527,-1.3452013326,-2.1023168077  
C,-5.993276975,-1.0303392996,-0.0852993507  
F,-6.4997984656,-1.5397636125,1.0388156999  
F,-6.7370716911,0.017413481,-0.4507344637  
F,-6.0871480964,-1.9516461598,-1.0484462932  
C,5.9944576589,-1.0265167348,0.0865058654  
F,6.1708846764,-1.6685819633,1.2450877616  
F,6.4014274319,-1.8197961556,-0.9061231793  
F,6.7687591313,0.061556411,0.1010920191  
Br,0.0033815281,2.4597605792,-0.0078092385

H,-1.9120963595,-4.4032784689,0.3609179879  
H,2.2180699182,-4.3656962411,-0.8010489348  
H,-2.4336233209,2.0985463291,-0.0604340591  
H,1.8102507962,1.9573374366,0.8075482951  
H,2.0061690249,4.3282627715,0.1514188686  
H,-2.2029725108,4.4825625575,-0.7156814428  
C,-0.0269417414,-5.9213590251,-0.7840973794  
F,1.1361227532,-6.4502034217,-1.1873567262  
F,-0.5355824482,-6.7062504607,0.1805340964  
F,-0.8841833203,-5.9528883066,-1.8199522599  
C,0.0145331119,5.9874404014,-0.7025153606  
F,1.28064214,6.4156496088,-0.7002141699  
F,-0.499729311,6.1734751554,-1.9260343896  
F,-0.6906316906,6.7307864678,0.1621344114  
Br,-0.0804081418,-0.1493568627,2.9819036629

#### **B3LYP/6-31G(d,p)**

C,0.5528835782,-0.4975315985,1.0628004655  
C,-0.4903340898,0.4982041764,0.7977799128  
C,-0.3197530213,1.864798936,0.4648261628  
C,0.3732308468,-1.9061190336,0.6472314054  
C,1.4733983075,-2.562469158,0.0750804106  
C,-0.8529961165,-2.5830971203,0.7704707449  
C,-0.9775405295,-3.8842893892,0.3051122347  
C,1.3446717426,-3.8661113427,-0.3973489505  
C,0.1194116649,-4.5231285104,-0.2867103951  
C,-1.4875767477,2.6152916373,0.156522695  
C,0.9510920376,2.4998398405,0.3878086998  
C,1.040114229,3.8234948186,0.0057436356  
C,-0.1278615046,4.5410018264,-0.3084746034  
C,-1.3900895829,3.9407292352,-0.2318076002  
H,1.5743128265,-0.1416176193,0.9647569242  
H,-1.5040672527,0.1078725727,0.7562803136  
H,2.4301528021,-2.055247929,-0.0082383352  
H,-1.6976512209,-2.114871165,1.26706039  
H,-1.9164347234,-4.4154454503,0.4125006924  
H,2.1940037491,-4.3741168758,-0.8389991206  
H,-2.4617074009,2.1403606377,0.2228740277  
H,1.8569386116,1.9585255632,0.636285315  
H,2.0034438858,4.3175489062,-0.0474958751  
H,-2.2777133546,4.5156246189,-0.4676608012  
C,-0.0460511468,-5.9212593399,-0.8442761951  
F,1.1286628379,-6.5740702,-0.8881808885  
F,-0.9029984673,-6.641637467,-0.0973376437  
F,-0.5381024095,-5.8711641361,-2.0978694653  
C,-0.0009157519,5.9790765674,-0.7847726927  
F,0.9932988084,6.6068623807,-0.1365943696  
F,0.2787651667,5.9935863766,-2.0993569478  
F,-1.1397920877,6.6588038525,-0.5858761575  
Br,0.0814156971,-0.1472670461,3.0672512535

**B97-D/6-31G(d,p)**

C,0.525177187,-0.501473533,0.8440059328  
C,-0.5439725788,0.5009054857,0.8086568057  
C,-0.3655959801,1.8933084971,0.4699240077  
C,0.3617024194,-1.8984736203,0.5115168596  
C,1.5328977419,-2.6390107248,0.2008491428  
C,-0.9062792876,-2.5394082425,0.4564458973  
C,-0.9932267458,-3.8733100913,0.0759905104  
C,1.4398532945,-3.9749549204,-0.1905841902  
C,0.1783257091,-4.5902927506,-0.2526352191  
C,-1.5218076575,2.6300416582,0.099334754  
C,0.9045095954,2.5338796735,0.4624706391  
C,1.007670103,3.863126794,0.0721120678  
C,-0.148963718,4.5764543167,-0.3147628331  
C,-1.4120658191,3.9625987023,-0.3003367077  
H,1.5462822559,-0.1198462648,0.7929579104  
H,-1.5617509561,0.1177827501,0.7178063621  
H,2.5083466822,-2.1548463798,0.2579744057  
H,-1.8122163043,-2.0044164938,0.7375315081  
H,-1.9577351252,-4.3761620068,0.0402812423  
H,2.3336907009,-4.5432597358,-0.4380129306  
H,-2.4985187913,2.1453422423,0.1162782711  
H,1.7978613884,2.0009272405,0.7845196704  
H,1.974739515,4.3625451616,0.0610527762  
H,-2.2934155649,4.5262936284,-0.5976261207  
C,0.0399518403,-6.0337369095,-0.7267337446  
F,1.2131329494,-6.7017811708,-0.6571385046  
F,-0.875866761,-6.6965158226,0.0199642402  
F,-0.3824184537,-6.0439074612,-2.0156846991  
C,0.0094643655,6.0435592253,-0.7016848042  
F,1.016481096,6.1850154389,-1.5982085865  
F,-1.1197454681,6.5518364945,-1.2425233012  
F,0.3238540419,6.7701238101,0.3989811256  
Br,-0.0561502902,0.0098335741,2.9866627544

**Table S6:** Comparison of key bond distances (in Å) and angles (in °) from the optimised geometries of selected stilbenes obtained using MP2 and different DFT methods, all within the 6-31G(d,p) basis.

| Compound  | Functional | Intermediate Type  | $r_{\text{CB}r1}/\text{Å}$ | $r_{\text{CB}r2}/\text{Å}$ | $r_{\text{CC}1}/\text{Å}$ | $r_{\text{CC}2}/\text{Å}$ | $r_{\text{CC}3}/\text{Å}$ | $\theta/^\circ$ |
|-----------|------------|--------------------|----------------------------|----------------------------|---------------------------|---------------------------|---------------------------|-----------------|
| <b>2</b>  | MP2        | Carbocation        | 1.97751                    | 2.73138                    | 1.47510                   | 1.50048                   | 1.38181                   | 103.622         |
|           | M06        | Carbocation        | 1.99865                    | 2.63937                    | 1.47091                   | 1.4901                    | 1.38043                   | 97.899          |
|           | M06-L      | Carbocation        | 2.00305                    | 2.66426                    | 1.46803                   | 1.49069                   | 1.38597                   | 99.014          |
|           | M06-2X     | Carbocation        | 1.97866                    | 2.66312                    | 1.48034                   | 1.50123                   | 1.37710                   | 99.687          |
|           | M06-HF     | Carbocation        | 1.97197                    | 2.65971                    | 1.49191                   | 1.50878                   | 1.37139                   | 99.386          |
|           | B3LYP      | Carbocation        | 2.03326                    | 2.68297                    | 1.47917                   | 1.49673                   | 1.38689                   | 98.479          |
|           | B97-D      | Carbocation        | 2.09846                    | 2.64845                    | 1.47302                   | 1.48554                   | 1.39770                   | 94.090          |
| <b>7</b>  | MP2        | Carbocation        | 2.00510                    | 2.60963                    | 1.46924                   | 1.49162                   | 1.39331                   | 96.343          |
|           | M06        | Carbocation        | 2.00870                    | 2.57186                    | 1.46618                   | 1.48582                   | 1.39064                   | 94.186          |
|           | M06-L      | Carbocation        | 2.02667                    | 2.56436                    | 1.46404                   | 1.48236                   | 1.39586                   | 93.141          |
|           | M06-2X     | Carbocation        | 1.99742                    | 2.54192                    | 1.47316                   | 1.49361                   | 1.39306                   | 92.936          |
|           | M06-HF     | Bromonium Ion      | 2.14635                    | 2.14635                    | 1.46443                   | 1.45780                   | 1.45780                   | 70.053          |
|           | B3LYP      | Carbocation        | 2.06016                    | 2.58357                    | 1.47014                   | 1.48677                   | 1.39891                   | 92.467          |
|           | B97-D      | Bromonium Ion      | 2.33916                    | 2.33916                    | 1.46221                   | 1.43533                   | 1.43533                   | 71.787          |
| <b>12</b> | MP2        | Carbocation        | 2.02486                    | 2.46531                    | 1.46390                   | 1.48435                   | 1.40521                   | 88.402          |
|           | M06        | Carbocation        | 2.01294                    | 2.50387                    | 1.4638                    | 1.4852                    | 1.39936                   | 90.727          |
|           | M06-L      | Carbocation        | 2.04707                    | 2.43678                    | 1.46275                   | 1.47601                   | 1.40759                   | 86.245          |
|           | M06-2X     | Bromonium Ion      | 2.1406                     | 2.1406                     | 1.46156                   | 1.45363                   | 1.45362                   | 70.039          |
|           | M06-HF     | Bromonium Ion      | 2.13374                    | 2.13374                    | 1.46434                   | 1.46356                   | 1.46356                   | 69.932          |
|           | B3LYP      | Carbocation        | 2.08803                    | 2.47328                    | 1.46672                   | 1.47987                   | 1.41103                   | 86.312          |
|           | B97-D      | Bromonium Ion      | 2.30135                    | 2.30135                    | 1.46478                   | 1.44158                   | 1.44158                   | 71.444          |
| <b>16</b> | MP2        | Open Bromonium Ion | 2.0433                     | 2.34276                    | 1.46169                   | 1.47849                   | 1.41812                   | 82.080          |
|           | M06        | Carbocation        | 2.0029                     | 2.48793                    | 1.46502                   | 1.48967                   | 1.40145                   | 90.312          |
|           | M06L       | Carbocation        | 2.02629                    | 2.43581                    | 1.46503                   | 1.48269                   | 1.40754                   | 86.92           |
|           | M06-2X     | Open Bromonium Ion | 2.05408                    | 2.21155                    | 1.46402                   | 1.47758                   | 1.43934                   | 75.837          |
|           | M06HF      | Open Bromonium Ion | 2.08968                    | 2.14387                    | 1.46505                   | 1.47864                   | 1.46245                   | 71.755          |
|           | B3LYP      | Carbocation        | 2.05471                    | 2.48793                    | 1.47017                   | 1.49046                   | 1.40978                   | 88.165          |
|           | B97-D      | Carbocation        | 2.12095                    | 2.45652                    | 1.47145                   | 1.47892                   | 1.41920                   | 84.215          |
| <b>18</b> | MP2        | Bromonium Ion      | 2.14633                    | 2.14633                    | 1.45924                   | 1.45068                   | 1.45068                   | 70.127          |
|           | M06        | Carbocation        | 2.01255                    | 2.46656                    | 1.46319                   | 1.48552                   | 1.40427                   | 88.956          |
|           | M06L       | Carbocation        | 2.04546                    | 2.40297                    | 1.46298                   | 1.47589                   | 1.41154                   | 84.727          |
|           | M06-2X     | Bromonium Ion      | 2.12506                    | 2.12577                    | 1.46217                   | 1.45804                   | 1.45817                   | 69.855          |
|           | M06HF      | Bromonium Ion      | 2.11938                    | 2.12016                    | 1.46453                   | 1.46925                   | 1.46897                   | 69.820          |
|           | B3LYP      | Carbocation        | 2.08873                    | 2.42776                    | 1.46630                   | 1.47956                   | 1.41688                   | 84.202          |

|  |       |               |         |         |         |         |         |        |
|--|-------|---------------|---------|---------|---------|---------|---------|--------|
|  | B97-D | Bromonium Ion | 2.27824 | 2.28535 | 1.46598 | 1.44530 | 1.44407 | 71.526 |
|--|-------|---------------|---------|---------|---------|---------|---------|--------|

**Table S7:** The type of intermediates observed for the electrophilic bromination of stilbenes 1 – 21 grouped according to the magnitude of the angle  $\theta$  calculated at the M06-2X/6-31G(d,p) level of theory.

| Group | Compound  | X <sub>1</sub>   | X <sub>2</sub>   | Intermediate Observed | $\theta / ^\circ$ |
|-------|-----------|------------------|------------------|-----------------------|-------------------|
| 1     | <b>1</b>  | OCH <sub>3</sub> | OCH <sub>3</sub> | Carbocation           | 105.831           |
|       | <b>2</b>  | OCH <sub>3</sub> | CH <sub>3</sub>  |                       | 99.687            |
|       | <b>3</b>  | OCH <sub>3</sub> | H                |                       | 99.527            |
|       | <b>4</b>  | OCH <sub>3</sub> | CF <sub>3</sub>  |                       | 100.079           |
|       | <b>5</b>  | OCH <sub>3</sub> | NO <sub>2</sub>  |                       | 100.486           |
|       | <b>6</b>  | OCH <sub>3</sub> | CN               |                       | 100.212           |
| 2     | <b>7</b>  | CH <sub>3</sub>  | CH <sub>3</sub>  | Carbocation           | 92.936            |
|       | <b>8</b>  | CH <sub>3</sub>  | H                |                       | 94.072            |
|       | <b>9</b>  | CH <sub>3</sub>  | CF <sub>3</sub>  |                       | 95.545            |
|       | <b>10</b> | CH <sub>3</sub>  | NO <sub>2</sub>  |                       | 96.340            |
|       | <b>11</b> | CH <sub>3</sub>  | CN               |                       | 96.089            |
| 3     | <b>12</b> | H                | H                | Bromonium Ion         | 70.039            |
|       | <b>13</b> | H                | CF <sub>3</sub>  | Carbocation           | 80.912            |
|       | <b>14</b> | H                | NO <sub>2</sub>  |                       | 88.345            |
|       | <b>15</b> | H                | CN               |                       | 84.019            |
| 4     | <b>16</b> | CF <sub>3</sub>  | NO <sub>2</sub>  | Open Bromonium Ion    | 75.837            |
|       | <b>17</b> | CN               | NO <sub>2</sub>  |                       | 75.061            |
| 5     | <b>18</b> | CF <sub>3</sub>  | CF <sub>3</sub>  | Bromonium Ion         | 69.855            |
|       | <b>19</b> | CF <sub>3</sub>  | CN               |                       | 71.899            |
|       | <b>20</b> | NO <sub>2</sub>  | NO <sub>2</sub>  |                       | 69.759            |
|       | <b>21</b> | CN               | CN               |                       | 69.879            |

**Table S8:** The Cartesian coordinates of the bromonium ion intermediates of stilbenes **1**, **7** and **12** with  $C_2$  symmetry imposed during the MP2/6-31G(d,p) geometry optimisations.

**Stilbene 1**

C,-0.511084,0.517423,0.199089  
C,0.511084,-0.517423,0.199089  
C,0.297489,-1.887693,-0.149944  
C,-0.297489,1.887693,-0.149944  
C,-1.438582,2.686342,-0.402933  
C,-1.303256,4.00758,-0.773537  
C,-0.020736,4.585583,-0.861784  
C,1.124669,3.807511,-0.590472  
C,0.98121,2.47912,-0.22725  
C,-0.98121,-2.47912,-0.22725  
C,-1.124669,-3.807511,-0.590472  
C,0.020736,-4.585583,-0.861784  
C,1.303256,-4.00758,-0.773537  
C,1.438582,-2.686342,-0.402933  
H,1.537184,-0.170547,0.139609  
H,-1.537184,0.170547,0.139609  
H,-2.426832,2.247582,-0.329564  
H,-2.161763,4.630044,-0.984997  
H,2.113232,4.238103,-0.644745  
H,1.872623,1.908361,0.000773  
H,2.426832,-2.247582,-0.329564  
H,2.161763,-4.630044,-0.984997  
H,-2.113232,-4.238103,-0.644745  
H,-1.872623,-1.908361,0.000773  
O,0,-5.878141,-1.217587  
C,-1.274009,-6.536246,-1.325448  
H,-1.789154,-6.534702,-0.365812  
H,-1.04002,-7.552527,-1.619004  
H,-1.888341,-6.059886,-2.088353  
O,0,5.878141,-1.217587  
C,1.274009,6.536246,-1.325448  
H,1.04002,7.552527,-1.619004  
H,1.789154,6.534702,-0.365812  
H,1.888341,6.059886,-2.088353  
Br,0,0,2.310084

**Stilbene 7**

C,-0.5767365674,0.4449831946,0.8381641857  
C,0.5767365674,-0.4449831946,0.8381641857  
C,0.5271944624,-1.8470857078,0.5051898423  
C,-0.5271944624,1.8470857078,0.5051898423  
C,-1.7198793469,2.445871343,0.0568385155  
C,-1.7189070021,3.7747211675,-0.3503417174  
C,-0.5502859329,4.5466689664,-0.2850750132  
C,0.6293724075,3.9438276907,0.1922386983  
C,0.6515897778,2.6155730078,0.5878933462  
C,1.7198793469,-2.445871343,0.0568385155  
C,1.7189070021,-3.7747211675,-0.3503417174  
C,0.5502859329,-4.5466689664,-0.2850750132  
C,-0.6293724075,-3.9438276907,0.1922386983  
C,-0.6515897778,-2.6155730078,0.5878933462  
H,-1.5432704688,-0.037902495,0.7323671284  
H,1.5432704688,0.037902495,0.7323671284  
H,2.6322056119,-1.8625034004,0.0091307765  
H,2.6373853401,-4.2251278144,-0.7052701047  
H,-1.5334600918,-4.535781941,0.2656559594  
H,-1.5641976653,-2.1947356175,0.9925871419  
H,-2.6322056119,1.8625034004,0.0091307765  
H,-2.6373853401,4.2251278144,-0.7052701047  
H,1.5334600918,4.535781941,0.2656559594  
H,1.5641976653,2.1947356175,0.9925871419  
C,0.5412790004,-5.9761812523,-0.7432770034  
H,1.5388206223,-6.4084552609,-0.7027705399  
H,0.1881422197,-6.0411811309,-1.773605249  
H,-0.1225499795,-6.5795253589,-0.126579806  
C,-0.5412790004,5.9761812523,-0.7432770034  
H,-1.5388206223,6.4084552609,-0.7027705399  
H,0.1225499795,6.5795253589,-0.126579806  
H,-0.1881422197,6.0411811309,-1.773605249  
Br,0,0,2.8927076763

**Stilbene 12**

C,-0.5304210002,-0.073038,0.5000609998  
C,0.5304209993,-0.0730380067,-0.5000609998  
C,1.912167,-0.404543,-0.225593  
C,-1.9121670051,-0.4045429758,0.225593  
C,2.485608,-0.280717,1.055391  
C,3.79738,-0.68908,1.25653  
C,4.542862,-1.219903,0.194774  
C,3.980798,-1.330505,-1.078821  
C,2.671608,-0.910276,-1.297308  
C,-2.6716080115,-0.9102759662,1.297308

C,-3.9807980168,-1.3305049497,1.078821  
C,-4.5428620154,-1.2199029426,-0.194774  
C,-3.7973800087,-0.689079952,-1.25653  
C,-2.4856080035,-0.2807169686,-1.055391  
H,-0.204527,-0.188417,1.529397  
H,0.2045269976,-0.1884170026,-1.529397  
H,1.932241,0.167778,1.871667  
H,4.247003,-0.590487,2.235302  
H,5.563658,-1.537222,0.362412  
H,4.562114,-1.732115,-1.897539  
H,2.2297,-0.988814,-2.283688  
H,-1.9322409979,0.1677780244,-1.871667  
H,-4.2470030075,-0.5904869463,-2.235302  
H,-5.5636580194,-1.5372219297,-0.362412  
H,-4.5621140219,-1.7321149424,1.897539  
H,-2.2297000125,-0.9888139718,2.283688  
Br,0.000000124,1.961008,0.

**Table S9:** Cartesian coordinates for the optimised geometries of the cationic intermediates of the electrophilic bromination of stilbazoles **22** and **23** using the PCM method for the inclusion of solvent effects (all in tetrahydrofuran).

**Stilbazole 22**

**MP2/6-31G(d,p)**

C,-0.7896076665,-0.4974889287,0.800570782  
C,0.2943346339,-1.3448744482,1.3517653009  
C,0.4582780611,-2.5863755936,0.5189106009  
C,-0.7148257943,0.8328558041,0.4646233631  
C,-1.8850434553,1.4523345076,-0.1053687284  
C,0.4734970974,1.6248535261,0.6364471958  
C,0.4963048282,2.9408111198,0.2646125219  
C,-1.8637398647,2.7620518763,-0.4835042814  
C,-0.6718708573,3.5234631951,-0.3109970663  
C,1.5526927701,-2.6833227889,-0.3441661932  
C,-0.4833501521,-3.6197321351,0.5182342316  
C,-0.2845143378,-4.6995802106,-0.339550713  
N,0.7652950419,-4.8109273566,-1.176297857  
C,1.661757788,-3.8081127325,-1.162211871  
H,-1.73306916,-1.0111215513,0.6357738312  
H,1.2408724387,-0.8248228618,1.4628515308  
H,-2.7820428638,0.8592911029,-0.2311345295  
H,1.3599267136,1.1908484374,1.0773027784  
H,1.3931504899,3.5244225622,0.4024040408  
H,-2.7230400536,3.252207826,-0.9179575349  
H,2.3082361916,-1.908673485,-0.3806157104  
H,-1.3337612577,-3.6039435864,1.1868818075  
H,-0.9959256348,-5.5165389405,-0.3565821326  
H,2.5056132824,-3.9114024408,-1.8339358069  
O,-0.7506402472,4.7704454299,-0.7131917102  
C,0.402974761,5.6479250966,-0.5855544531  
H,0.0679711098,6.5921940662,-0.9937158482  
H,0.6668578112,5.7552101726,0.4625676615  
H,1.2312950794,5.2512980172,-1.1654101738  
Br,-0.2894417607,-1.764109482,3.1966342055

**Stilbazole 23**

**MP2/6-31G(d,p)**

C,-0.3669262522,0.5165396814,0.7679359498  
C,-0.6211394037,-0.8446597122,1.2854574748  
C,-1.7151733861,-1.5185682138,0.5067202314  
C,0.8570022856,1.0684010014,0.4333117159  
C,0.8547496001,2.4120743965,-0.0622712586  
C,2.0961723558,0.3600833866,0.5476358633  
C,3.264450252,0.9885892291,0.1863325732  
C,2.0389627639,3.0158970908,-0.4228023638  
C,3.2588832563,2.3180621895,-0.3045167024  
C,-1.374925259,-2.5329896666,-0.3919122973  
C,-3.0531003794,-1.1224196626,0.5922031814  
C,-3.9868087964,-1.7608688749,-0.2215657081  
N,-3.67819558,-2.7413269638,-1.0919755596

**M06-2X/6-31G(d,p)**

C,-0.6909779159,-0.4730672726,0.5598355252  
C,0.3998536073,-1.3037164977,1.136548447  
C,0.5010495121,-2.6482656565,0.4603215285  
C,-0.6513959299,0.8654375082,0.2811036061  
C,-1.8270567967,1.4837536165,-0.2839995355  
C,0.4977409965,1.6940483466,0.5411836211  
C,0.480778684,3.0266019433,0.2659718601  
C,-1.8504537469,2.809852205,-0.5694288908  
C,-0.6981588523,3.6039643383,-0.2952477626  
C,1.5669747038,-2.8956751203,-0.3993269651  
C,-0.4730210238,-3.6333938057,0.6147308889  
C,-0.3347932216,-4.81617681,-0.1026217041  
N,0.6823374039,-5.0670193175,-0.9330273788  
C,1.6095222037,-4.118181564,-1.0675804483  
H,-1.6154326534,-1.0115578756,0.3535531565  
H,1.3647855329,-0.8031292627,1.1534013179  
H,-2.6964786053,0.8644403267,-0.4798362008  
H,1.390699729,1.2604375299,0.9764790944  
H,1.3483315521,3.638816996,0.4729857745  
H,-2.7171147725,3.3001122325,-0.9953449535  
H,2.3519146128,-2.1622562975,-0.5522994238  
H,-1.307099041,-3.498146292,1.2955842879  
H,-1.0781172858,-5.6019404542,0.0007472454  
H,2.4337793942,-4.3381249704,-1.7407494283  
O,-0.8111875751,4.8673443359,-0.5900286956  
C,0.2751226244,5.7803615656,-0.3496144745  
H,-0.0909253611,6.7484922275,-0.6786643246  
H,0.5095078222,5.8060755379,0.7156642212  
H,1.1464172486,5.4853556552,-0.9362264271  
Br,-0.1384178536,-1.4752569706,3.0252712806

**M06-2X/6-31G(d,p)**

C,-0.355072762,0.5080718414,0.6760373589  
C,-0.6106962106,-0.8499170539,1.2146060032  
C,-1.737025733,-1.539424319,0.4856401712  
C,0.8682903617,1.0723565229,0.3828928826  
C,0.8774808686,2.4098018803,-0.1302626987  
C,2.1168022092,0.3891658043,0.5597550545  
C,3.2869169178,1.0185038472,0.2375338276  
C,2.0614334091,3.0230041166,-0.4522631433  
C,3.2821364834,2.3413611415,-0.2735484597  
C,-1.4212625945,-2.5254781969,-0.4449979617  
C,-3.0726750787,-1.1809018973,0.6534538512  
C,-4.0296949923,-1.8285011955,-0.120816942  
N,-3.7425461329,-2.7768092062,-1.0173655356



|                                             |                                             |
|---------------------------------------------|---------------------------------------------|
| C,-2.3864967356,-3.1103371212,-1.1599032937 | C,-2.4598818047,-3.1112984942,-1.1657817655 |
| H,-1.2543081865,1.1319658252,0.6415754516   | H,-1.2505481718,1.1056608052,0.5049841847   |
| H,0.2663907246,-1.4663725235,1.3435136193   | H,0.2745112981,-1.4785926794,1.2627286891   |
| H,-0.0869016823,2.9397076535,-0.1477616284  | H,-0.0674651161,2.9273204785,-0.2622379805  |
| H,2.1227025697,-0.6530120647,0.9235160012   | H,2.1399311383,-0.6205759909,0.9534666556   |
| H,4.2075728096,0.4653305754,0.2724630673    | H,4.2359782793,0.5105931092,0.3706779749    |
| H,2.0398290494,4.0293586181,-0.7998364502   | H,2.0674080857,4.0336439096,-0.8438271265   |
| H,-0.3524161083,-2.8743078096,-0.4927403806 | H,-0.395498607,-2.8373946875,-0.611893322   |
| H,-3.370414623,-0.3615084471,1.292906313    | H,-3.368712671,-0.4355762875,1.3839377249   |
| H,-5.031498635,-1.4783318639,-0.1725814373  | H,-5.0795878689,-1.572356351,-0.0086242629  |
| H,-2.1517676695,-3.9046591609,-1.8582571362 | H,-2.2424866869,-3.8874955432,-1.8944555917 |
| C,4.5512641329,2.9667289075,-0.6742026046   | C,4.5786237964,2.9966741644,-0.6085146017   |
| H,4.3986804798,3.9540963188,-1.1004287535   | H,4.4391988405,3.992027083,-1.0279352311    |
| H,5.1801559369,3.0577237457,0.2130629588    | H,5.193426713,3.070941787,0.294994291       |
| H,5.0911681763,2.3458650807,-1.3894889594   | H,5.1364060207,2.377961245,-1.3184691264    |
| Br,-1.1370730889,-0.4848114564,3.1629953748 | Br,-1.0645513844,-0.4165156742,3.0796703219 |
